# Supplementary material for: Practical Synthesis from Streptomycin and Regioselective Partial Deprotections of (−)-(1R,2S,3R,4R,5S,6S)-1,3-Di(deamino)-1,3-diazido-2,5,6-tri-O-benzylstreptamine
Source: PubMed Central journal article supplement (PMC10949228; doi:10.1021/acs.joc.3c02922), 2024-03-01

Supporting Information

for

**Practical Synthesis from Streptomycin and Regioselective Partial Deprotections of (-)-1*R*,2*S*,3*R*,4*R*,5*S*,6*S*-1,3-Di(deamino)-1,3-diazido-2,5,6-tri-*O*-benzylstreptamine**

Niteshlal Kasdekar,<sup>a</sup> Michael R Spieker<sup>a,b</sup> and David Crich<sup>a,c,d,\*</sup>

- a) Department of Pharmaceutical and Biomedical Sciences, University of Georgia, 250 West Green Street, Athens, GA 30602, USA
- b) Department of Biochemistry and Molecular Biology, University of Georgia, 120 East Green Street, Athens, GA 30602, USA
- c) Department of Chemistry, University of Georgia, 302 East Campus Road, Athens, GA 30602, USA
- d) Complex Carbohydrate Research Center, University of Georgia, 315 Riverbend Road, Athens, GA 30602, USA

Email: David.Crich@uga.edu

## Table of contents

| Compound                                                                                                                                                                                                 | Spectral Charts |
|----------------------------------------------------------------------------------------------------------------------------------------------------------------------------------------------------------|-----------------|
| 1,3-Bis(deamino)-1,3-diazido-dihydrostreptomycin <b>(11)</b>                                                                                                                                             | S3-S6           |
| <i>N'</i> -Methyl-1,3-bis(deamino)-1,3-diazido-dihydrostreptomycin <b>(12)</b>                                                                                                                           | S7-S11          |
| 1,3-Bis(deamino)-1,3-diazido-2,5,6-tri- <i>O</i> -benzyl-4- <i>O</i> -(3',6'-di- <i>O</i> -benzyl-2'- <i>O</i> -(2''- <i>N</i> -benzyl-3'',4'',6''-tri- <i>O</i> -benzyl-dihydrostreptomycin <b>(13)</b> | S12-S15         |
| 1,3-Di(deamino)-1,3-diazido-2,5,6-tri- <i>O</i> -benzylstreptamine <b>(14)</b>                                                                                                                           | S16-S19         |
| Methyl Streptobiosaminide <b>(15)</b>                                                                                                                                                                    | S20-S23         |
| 4- <i>O</i> -Acetyl-1,3-di(deamino)-1,3-diazido-2,5,6-tri- <i>O</i> -benzylstreptamine <b>(16)</b>                                                                                                       | S24-S27         |
| 1,3-Di(deamino)-1,3-diazido-2,6-di- <i>O</i> -benzylstreptamine <b>(17)</b>                                                                                                                              | S28-S31         |
| 4,5-Di- <i>O</i> -acetyl-1,3-di(deamino)-1,3-diazido-2,6-di- <i>O</i> -benzylstreptamine <b>(18)</b>                                                                                                     | S32-S35         |
| 1,3-Di(deamino)-1,3-diazido-5,6-di- <i>O</i> -benzylstreptamine <b>(19)</b>                                                                                                                              | S36-S39         |
| 1,3-Di(deamino)-1,3-diazido-2,5-di- <i>O</i> -benzylstreptamine <b>(20)</b>                                                                                                                              | S40-S43         |
| 2,4-Di- <i>O</i> -acetyl-1,3-di(deamino)-1,3-diazido-5,6-di- <i>O</i> -benzylstreptamine <b>(21)</b>                                                                                                     | S44-S47         |
| 4,6-Di- <i>O</i> -acetyl-1,3-di(deamino)-1,3-diazido-2,5-di- <i>O</i> -benzylstreptamine <b>(22)</b>                                                                                                     | S48-S51         |
| 1,3-Di(deamino)-1-azido-3- <i>N</i> -tert-butylcarboxy-2,5,6-tri- <i>O</i> -benzyl-3,4-oxazolidino-streptamine <b>(23)</b>                                                                               | S52-S55         |

### Spectral Charts

$^1\text{H}$  NMR (900 MHz,  $\text{CD}_3\text{OD}$ ) spectrum of 1,3-bis(deamino)-1,3-diazo-dihydrostreptomycin (**11**)

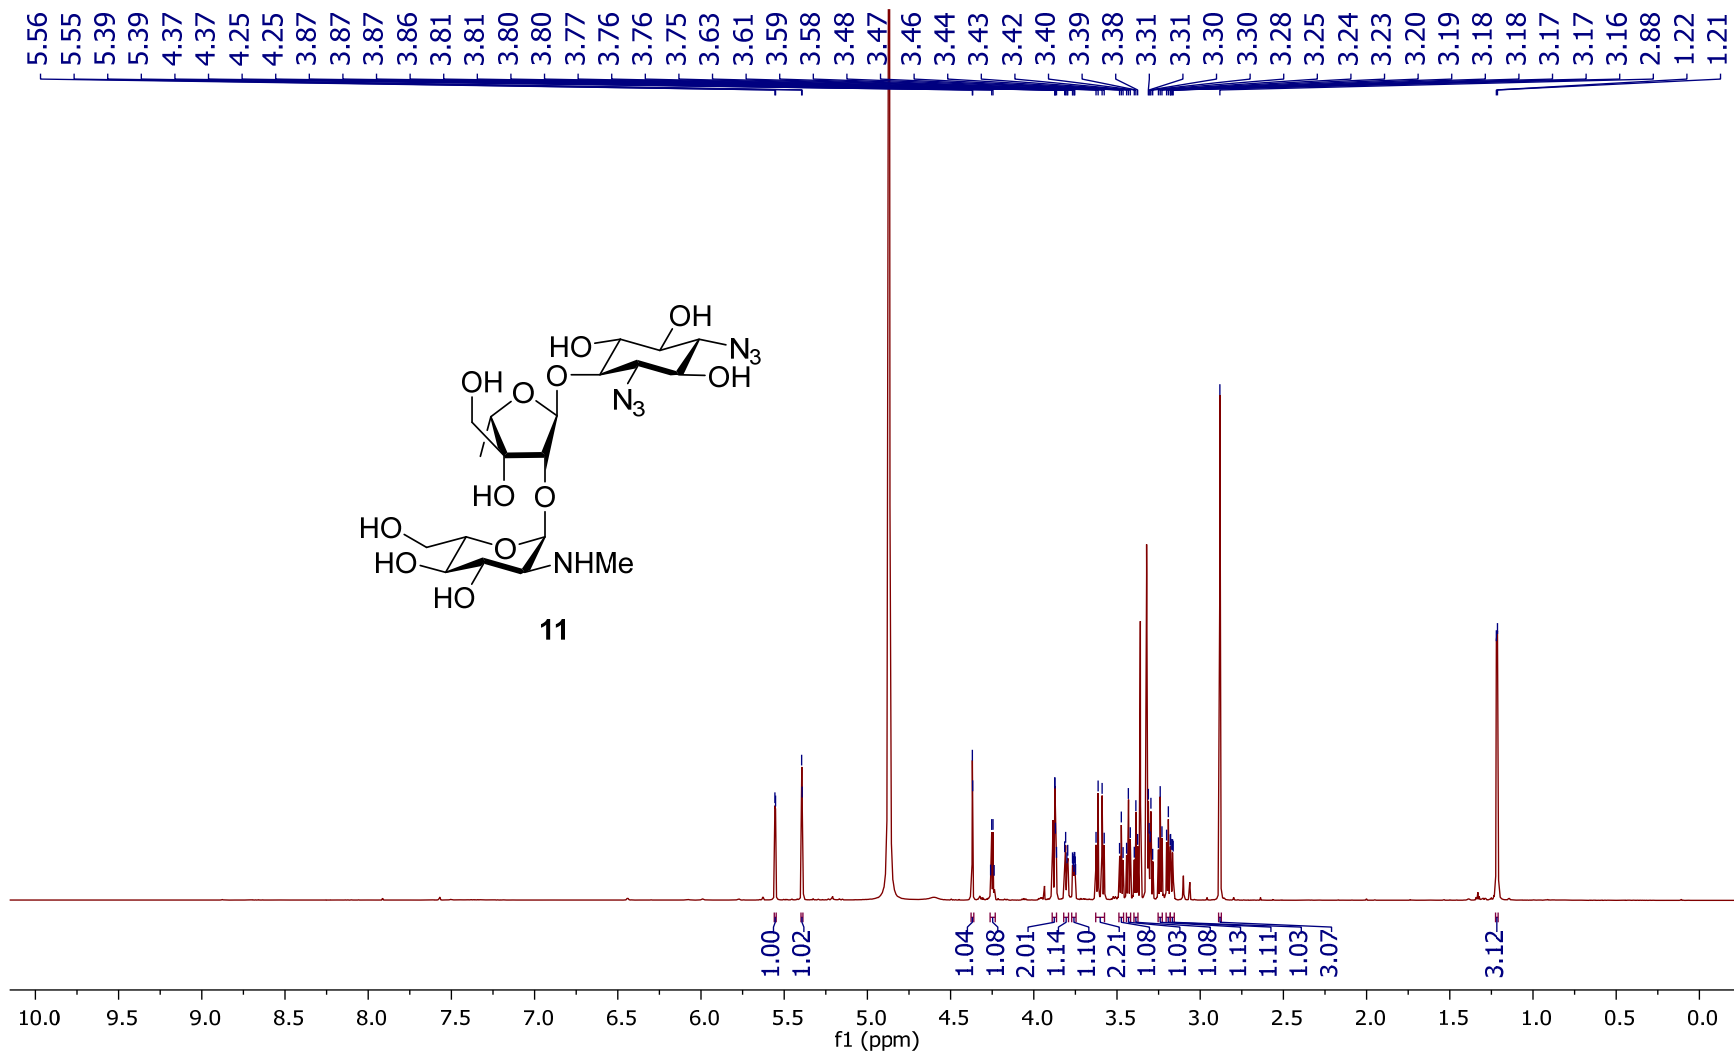

$^{13}\text{C}\{^1\text{H}\}$  NMR (226 MHz,  $\text{CD}_3\text{OD}$ ) spectrum of 1,3-bis(deamino)-1,3-diazido-dihydrostreptomycin (**11**)

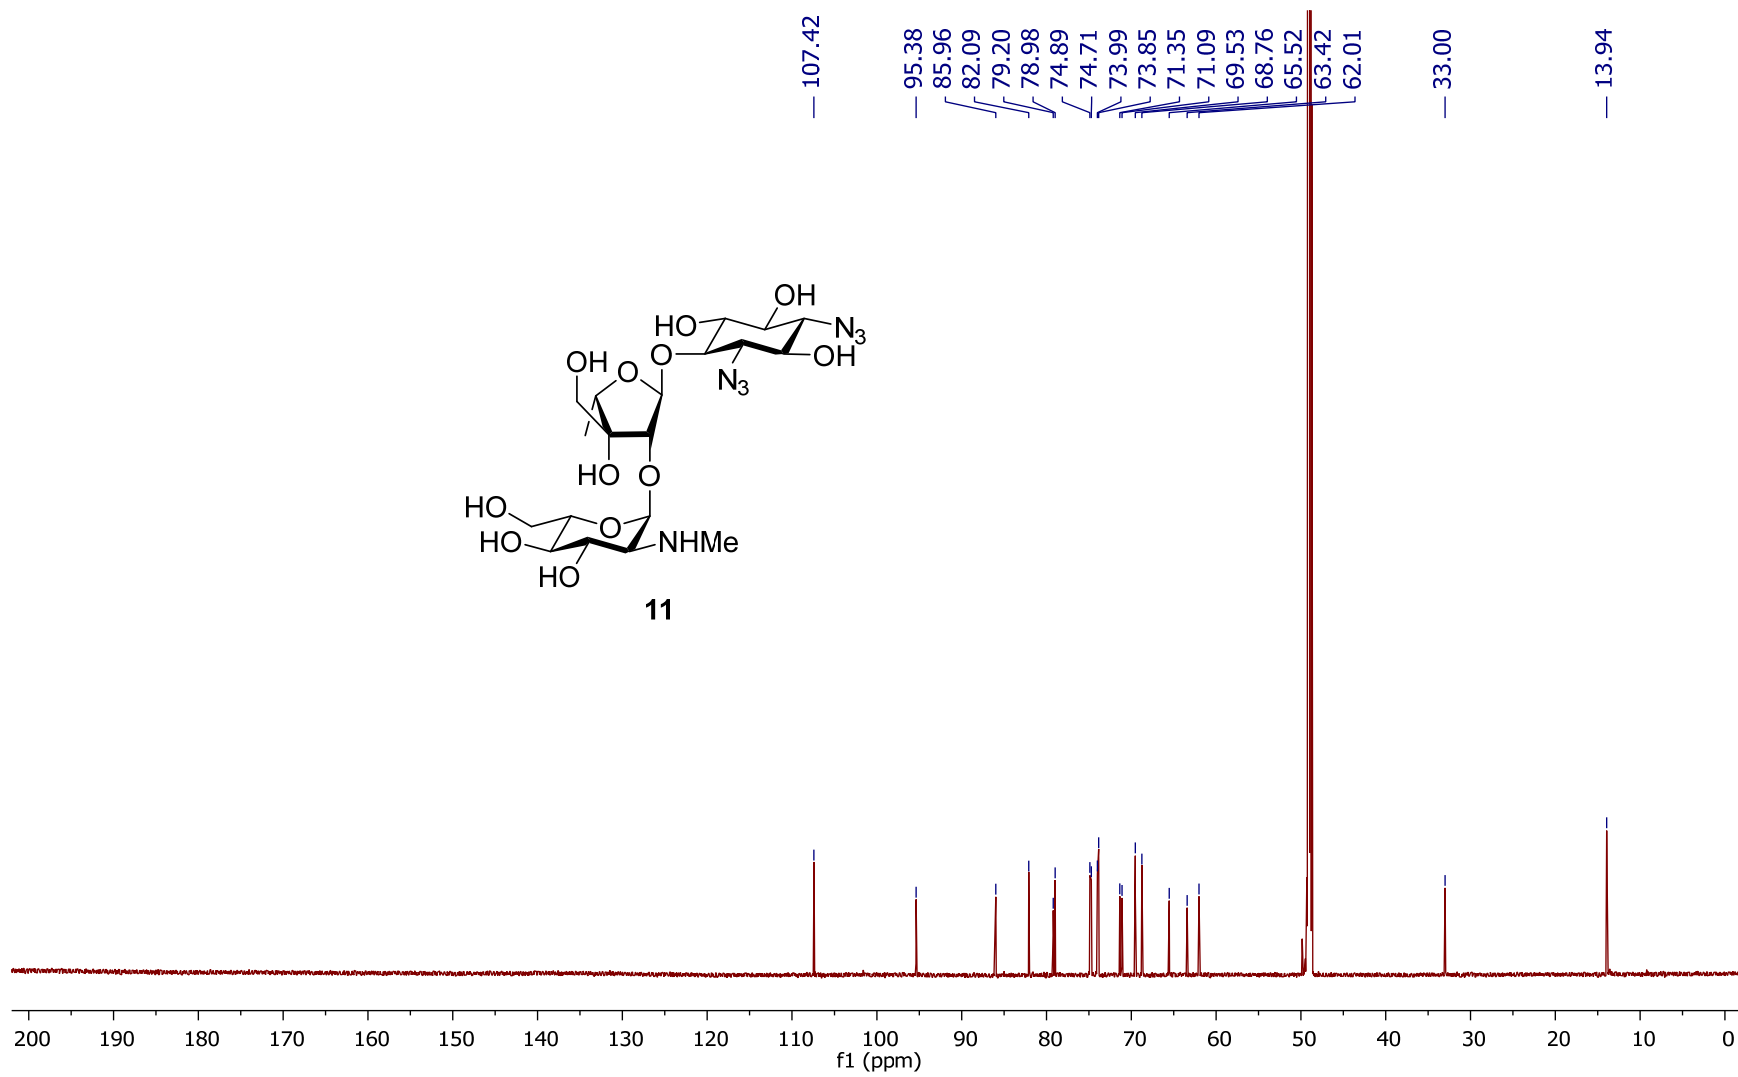

COSY NMR (900 MHz, CD<sub>3</sub>OD) spectrum 1,3-bis(deamino)-1,3-diazido-dihydrostreptomycin (**11**)

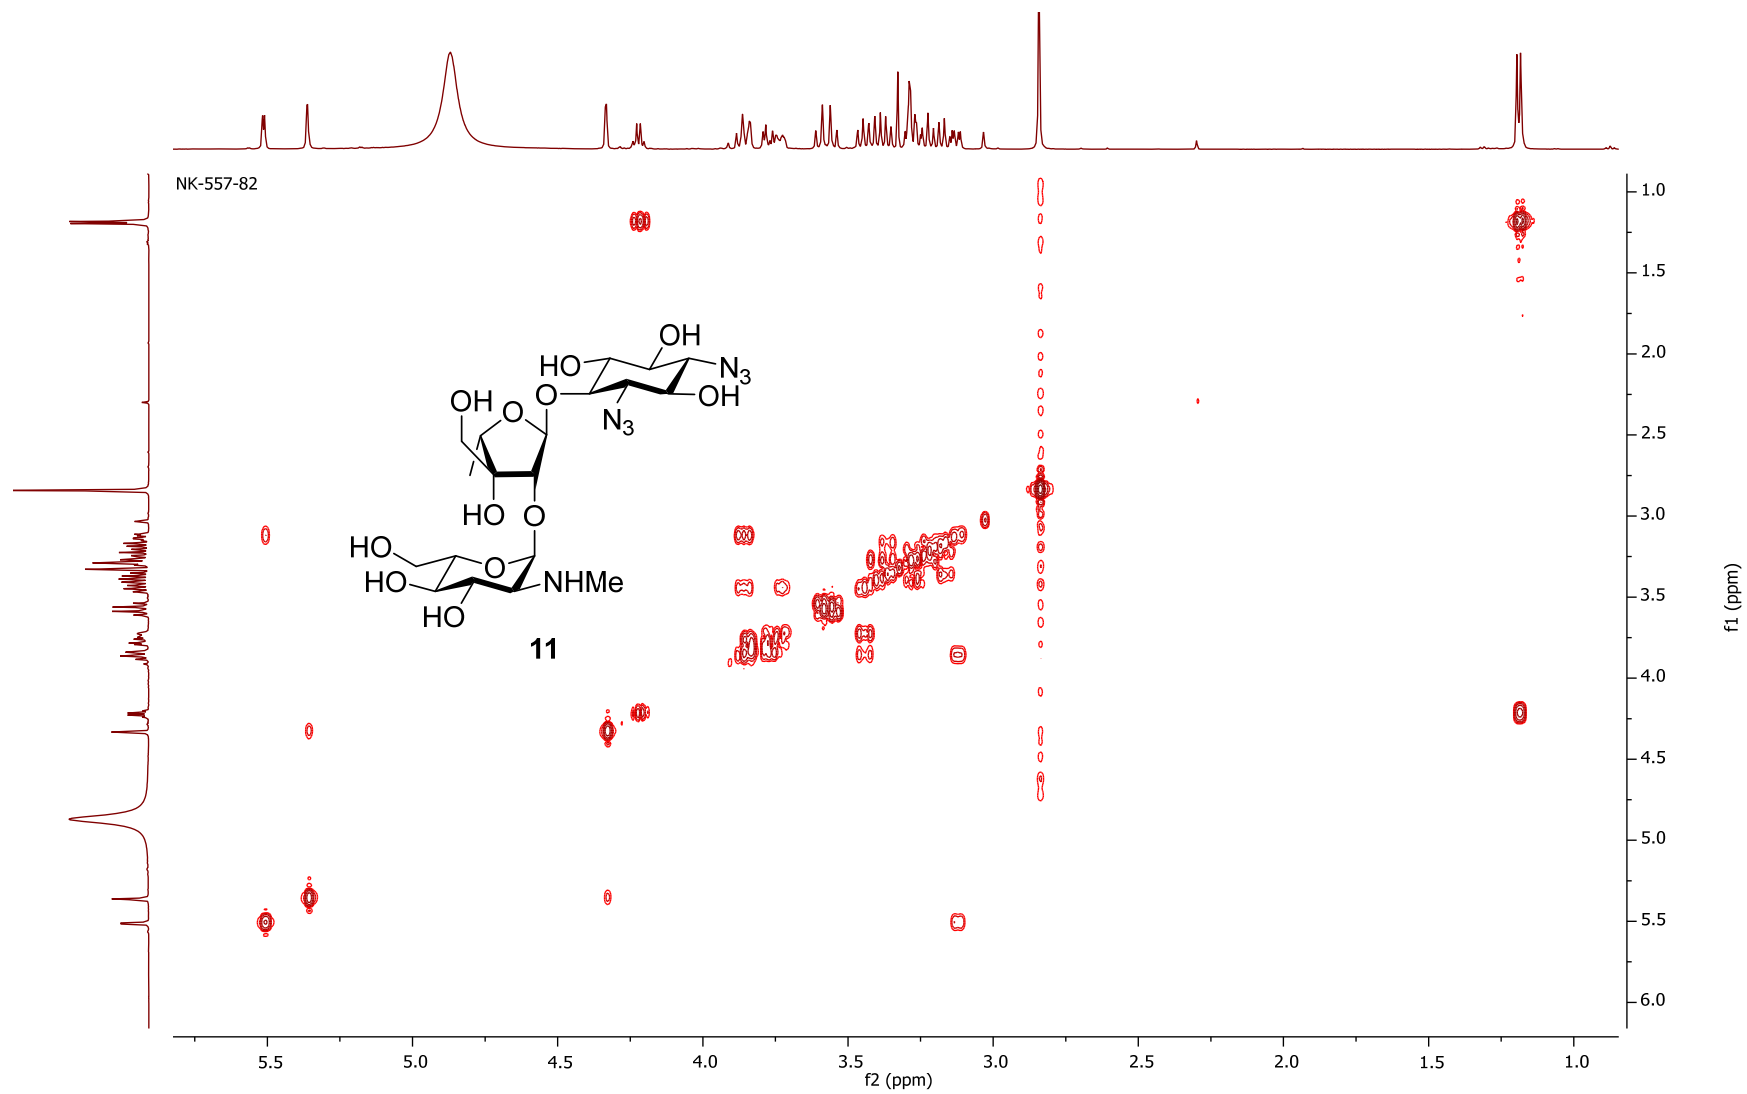

HSQC NMR (900 MHz, CD<sub>3</sub>OD) spectrum of 1,3-bis(deamino)-1,3-diazido-dihydrostreptomycin (**11**)

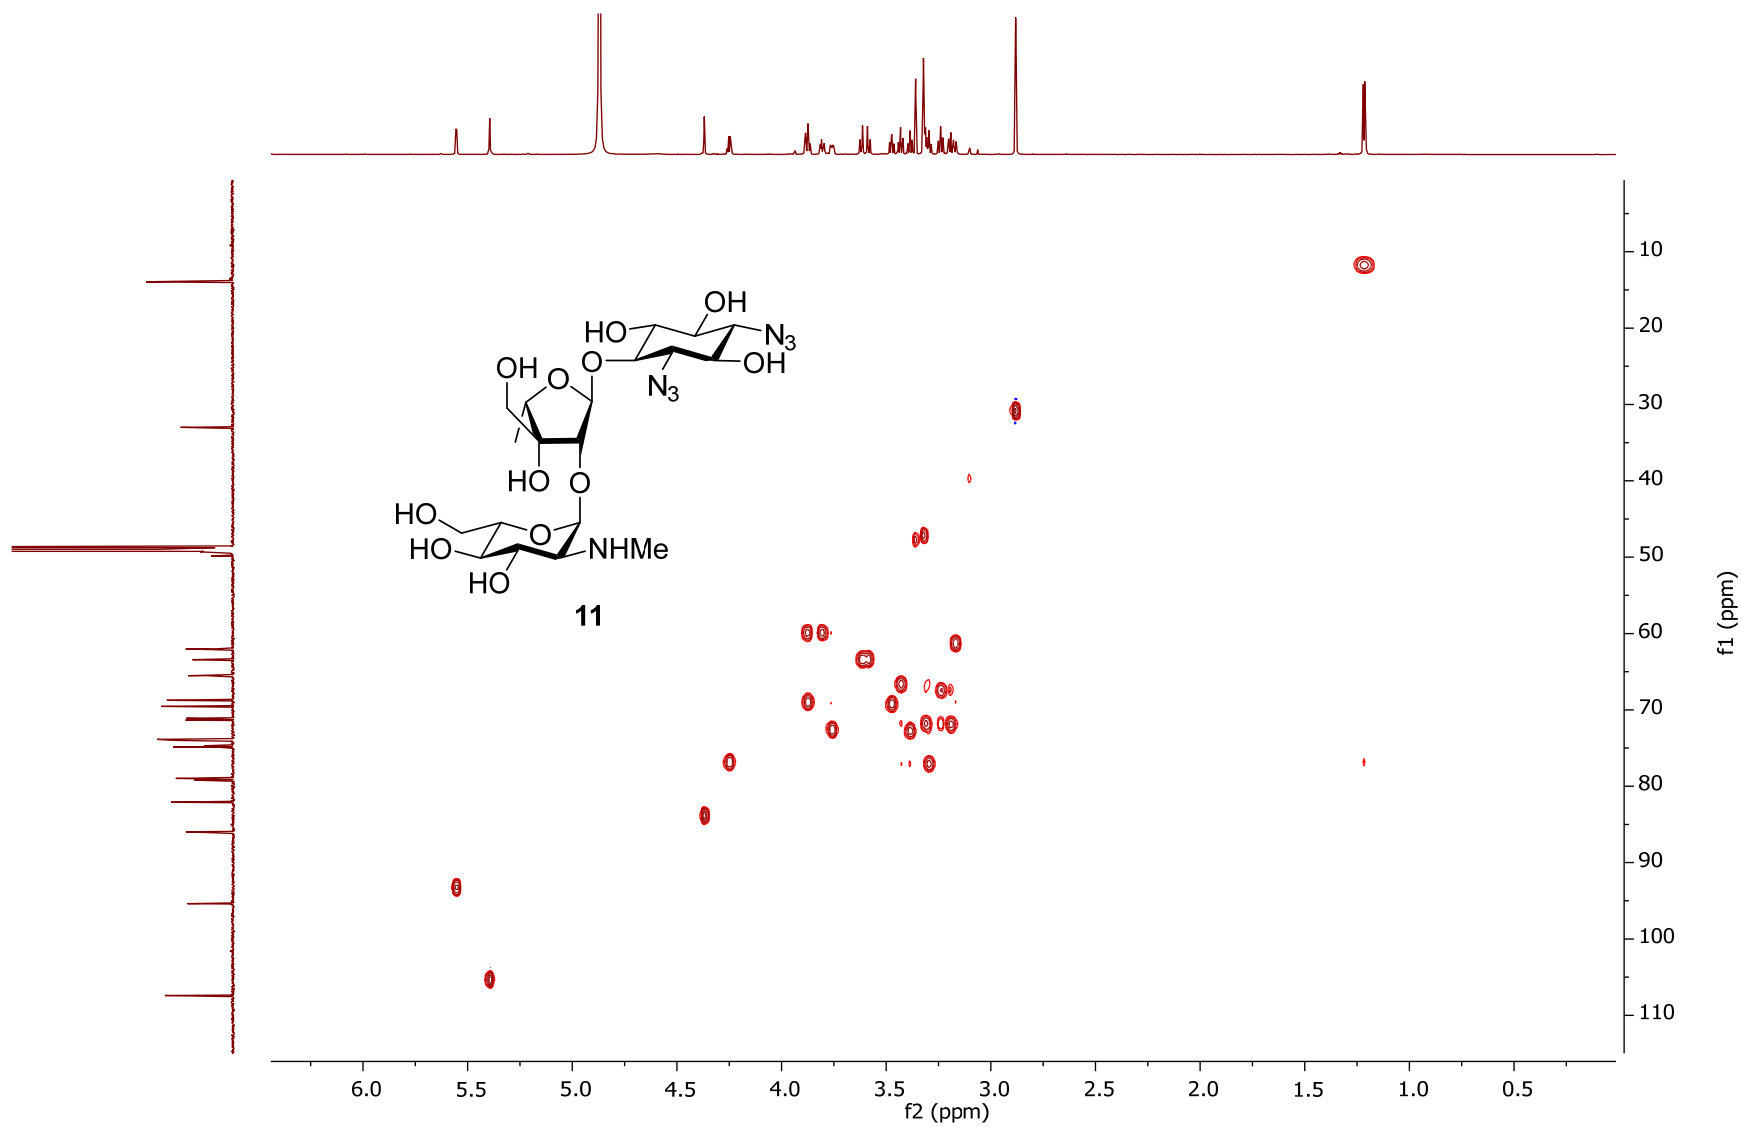

$^1\text{H}$  NMR (900 MHz,  $\text{CD}_3\text{OD}$ ) spectrum of *N'*-methyl-1,3-bis(deamino)-1,3-diazo-dihydrostreptomycin (**12**)

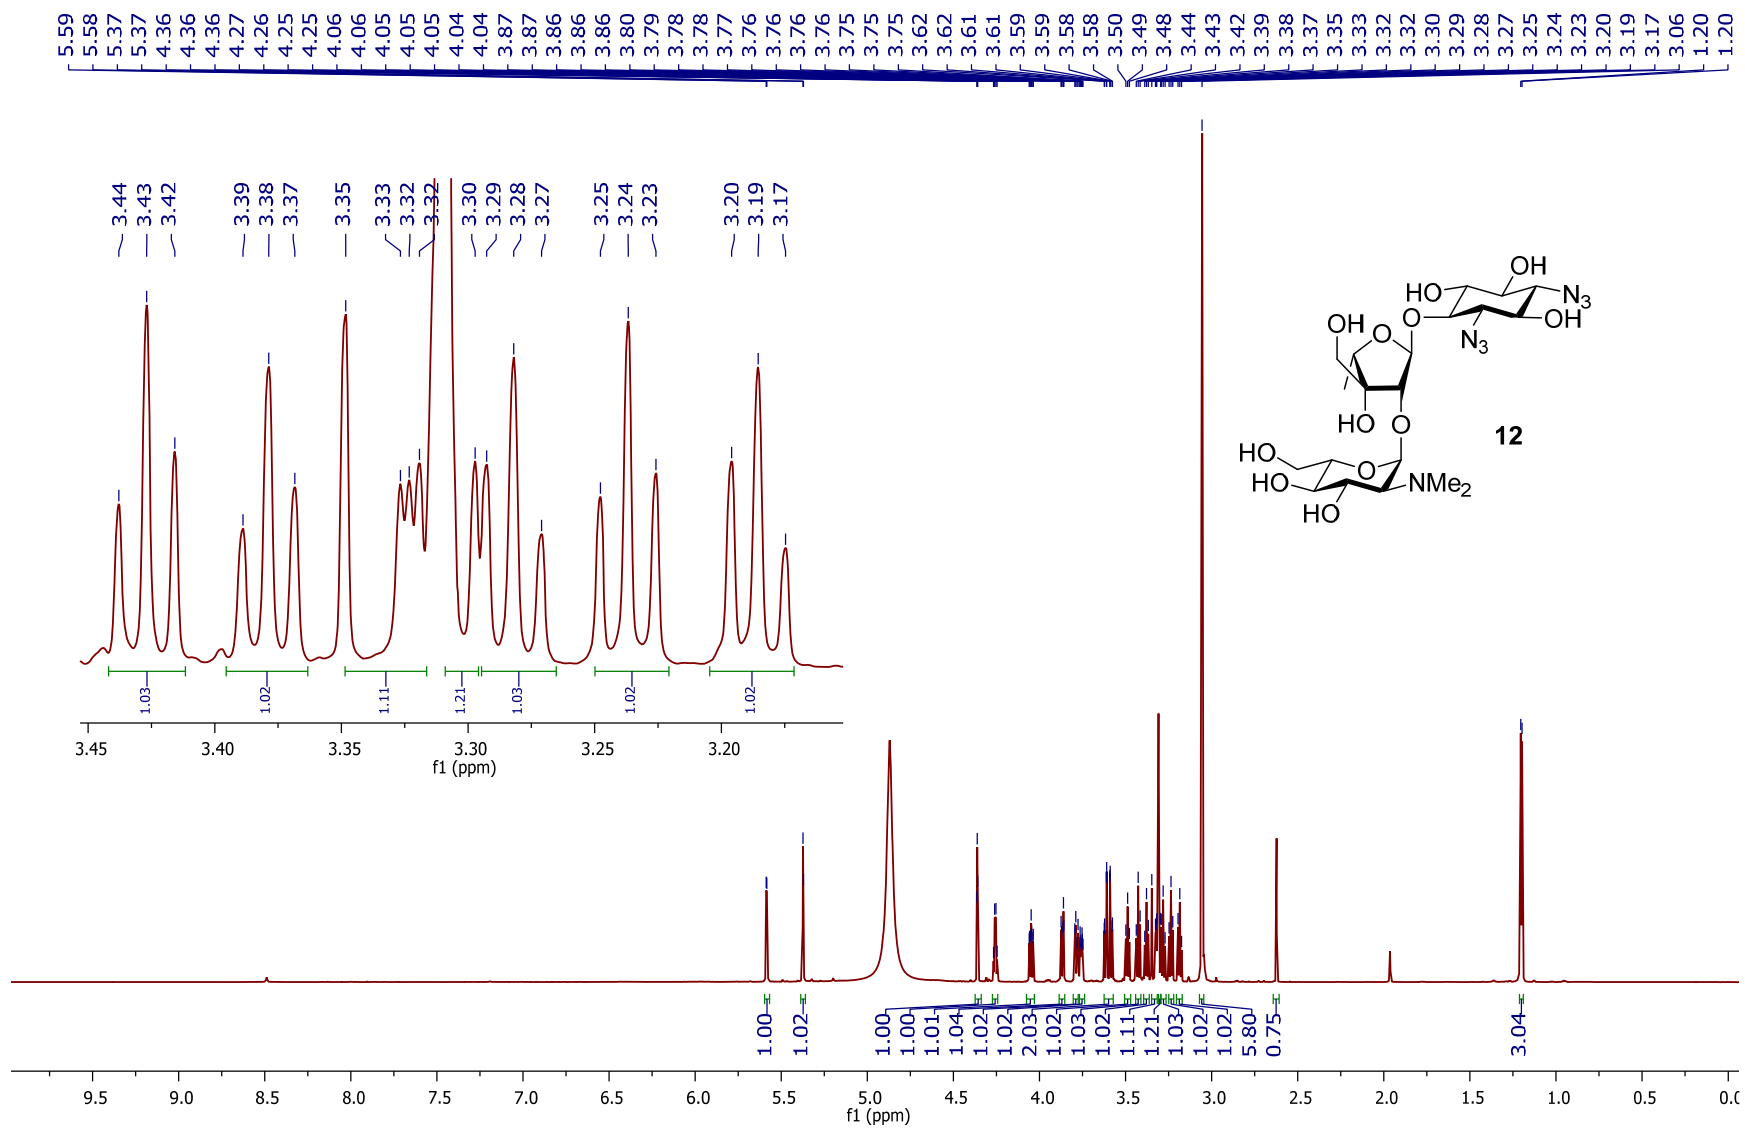

$^{13}\text{C}\{^1\text{H}\}$  NMR (226 MHz,  $\text{CD}_3\text{OD}$ ) spectrum of *N*'-methyl-1,3-bis(deamino)-1,3-diazido-dihydrostreptomycin (**12**)

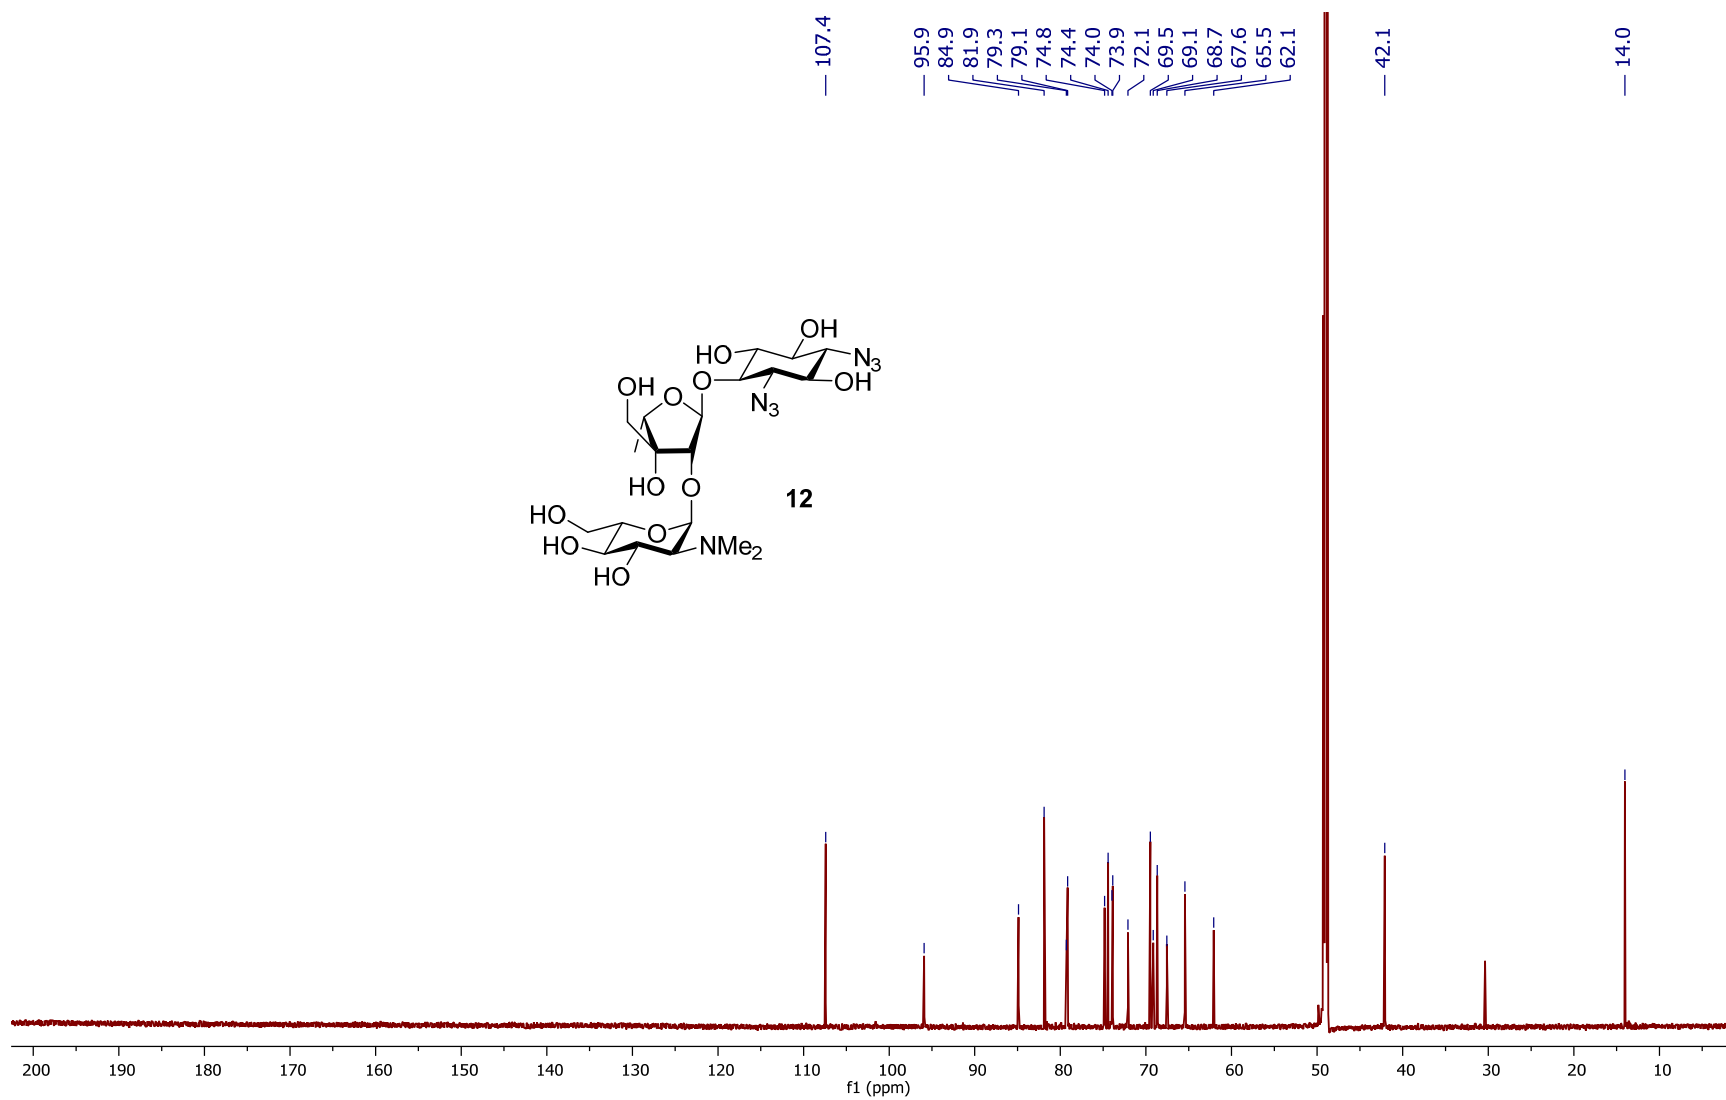



COSY NMR (900 MHz, CD<sub>3</sub>OD) spectrum of *N'*-methyl-1,3-bis(deamino)-1,3-diazo-dihydrostreptomycin (**12**)

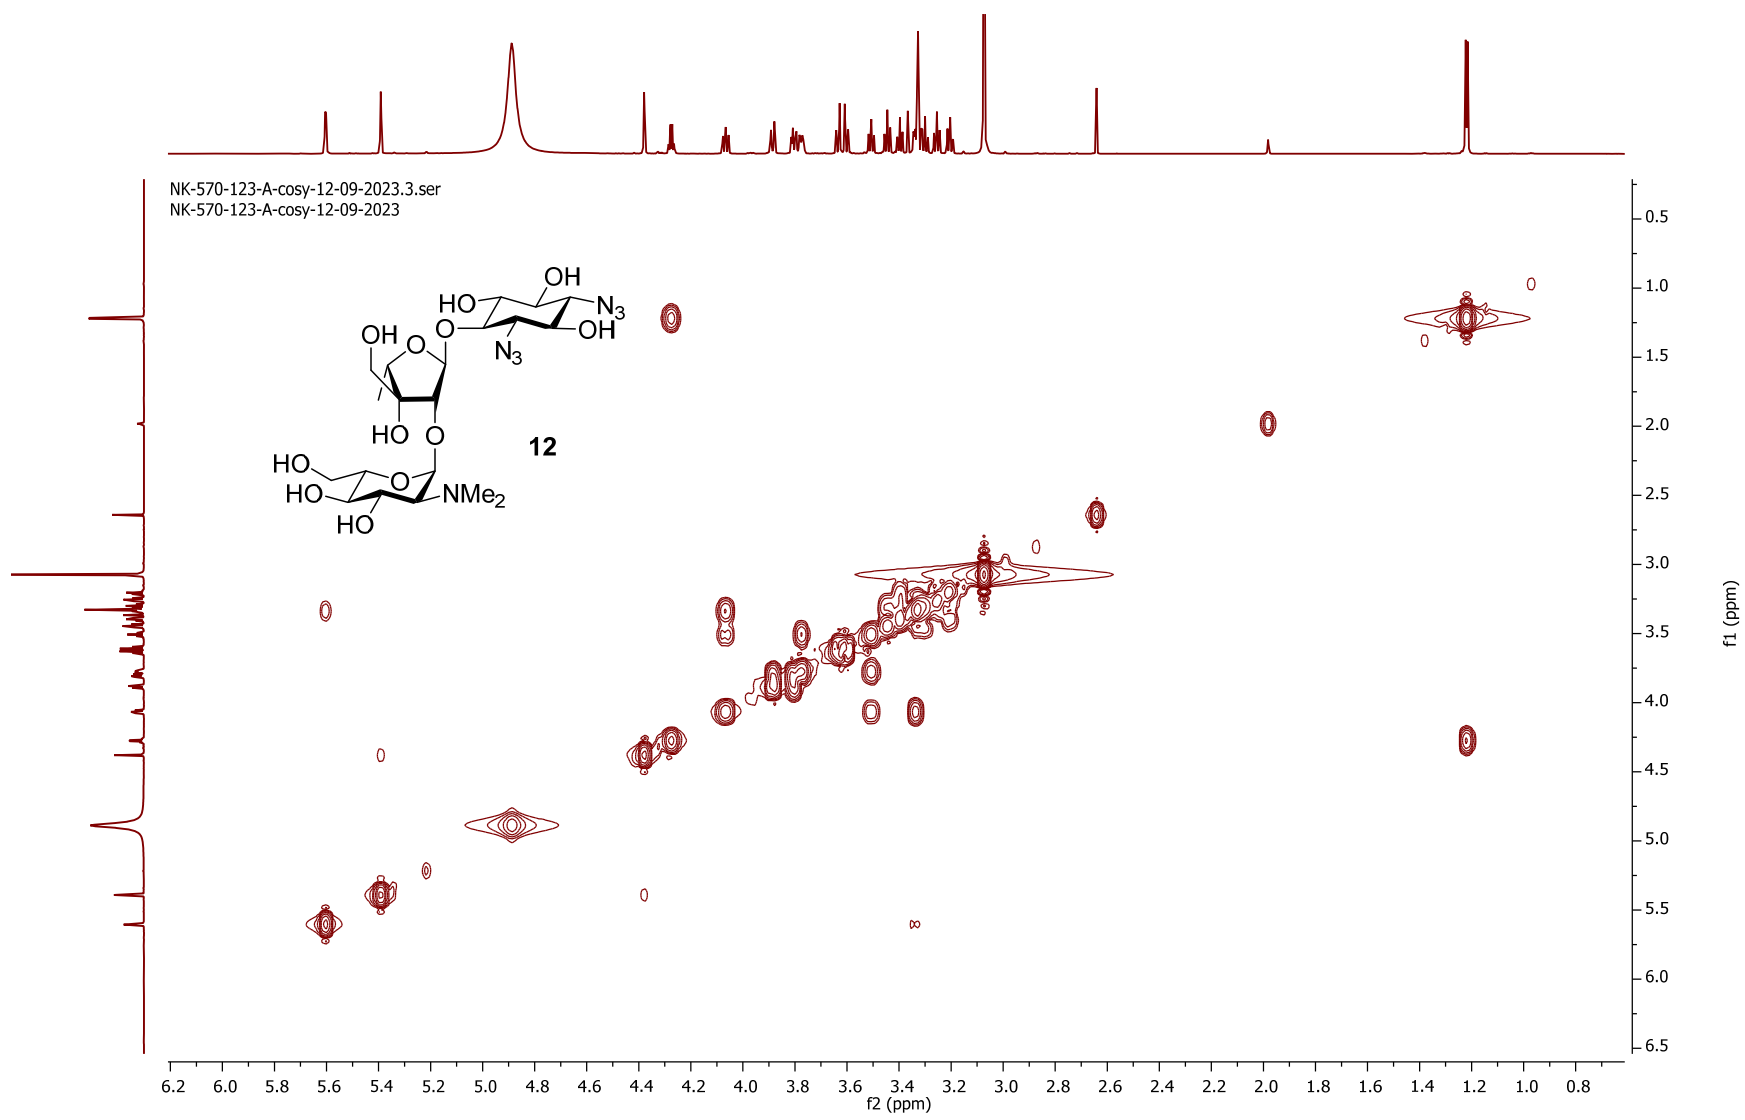

HSQC NMR (900 MHz, CD<sub>3</sub>OD) spectrum of *N*'-methyl-1,3-bis(deamino)-1,3-diazido-dihydrostreptomycin (**12**)

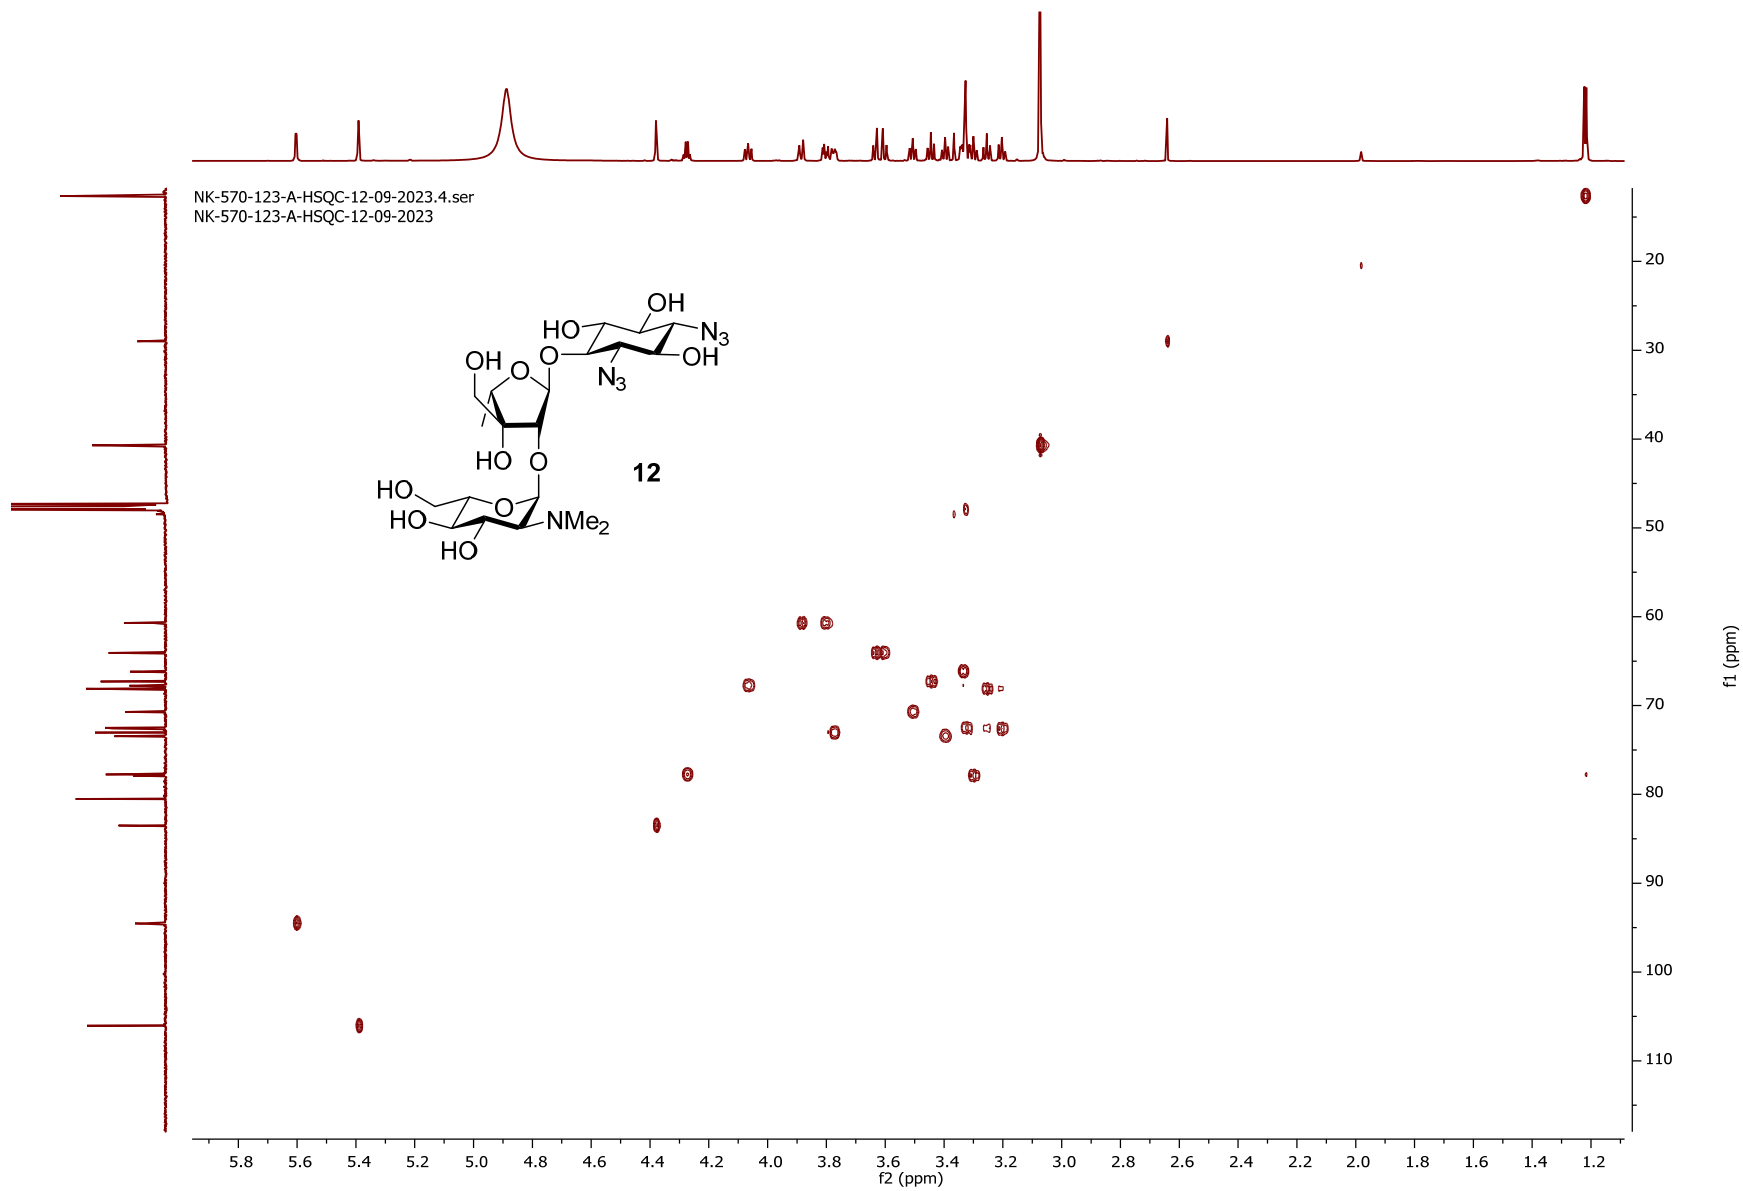

HMBC NMR (900 MHz, CD<sub>3</sub>OD) spectrum of *N*'-methyl-1,3-bis(deamino)-1,3-diazo-dihydrostreptomycin (**12**)

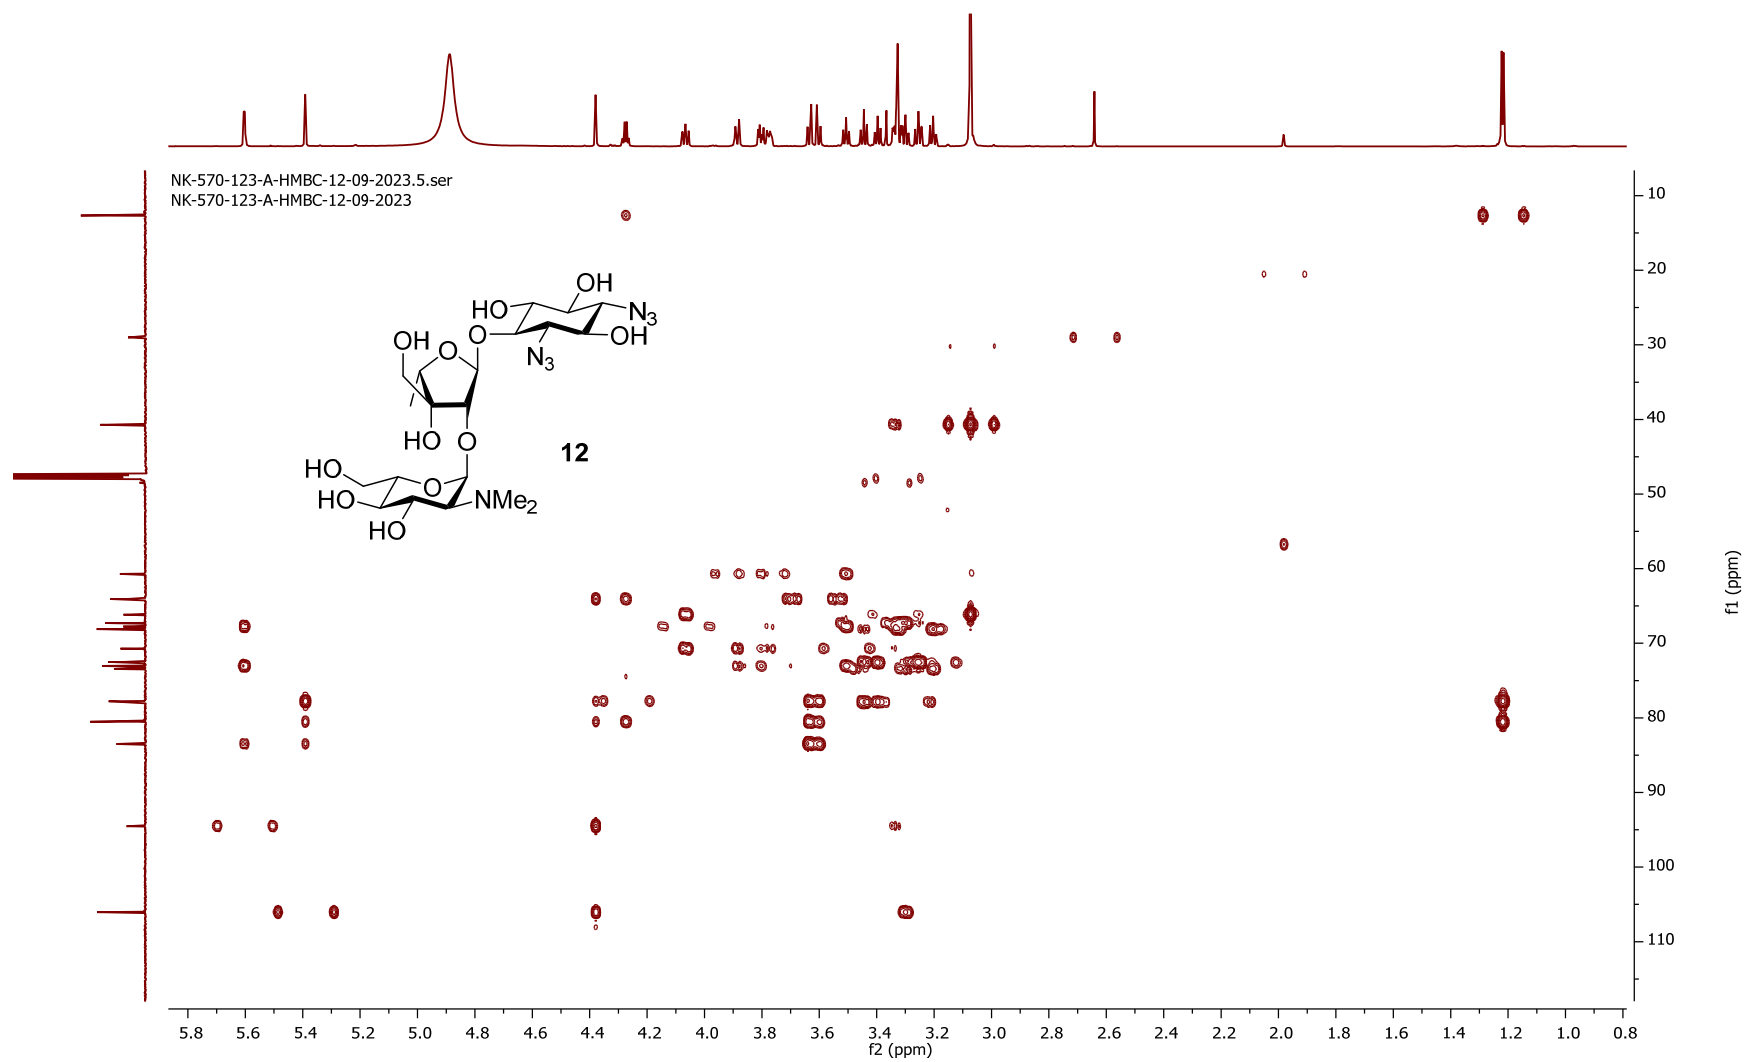

<sup>1</sup>H NMR (500 MHz, CDCl<sub>3</sub>) spectrum of 1,3-bis(deamino)-1,3-diazo-2,5,6-tri-O-benzyl-4-O-(3',6'-di-O-benzyl-2'-O-(2''-N-benzyl-3'',4'',6''-tri-O-benzyl-dihydrostreptomycin (**13**))

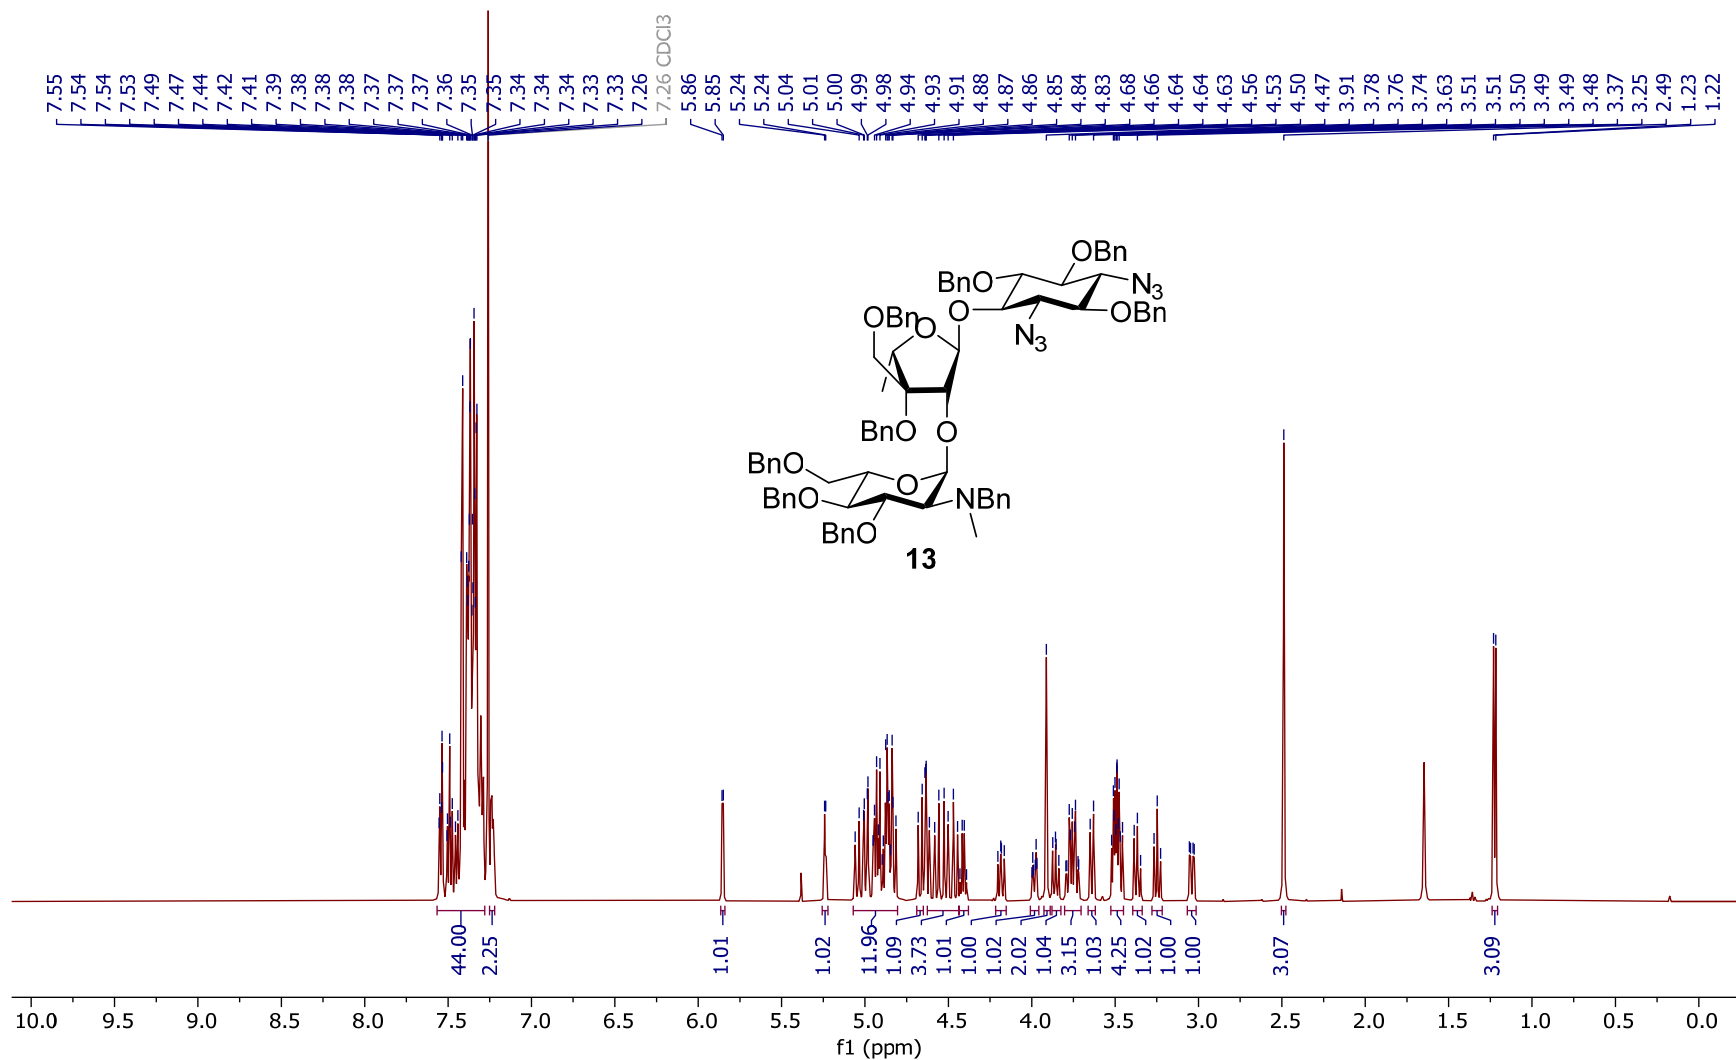

$^{13}\text{C}\{^1\text{H}\}$  NMR (126 MHz,  $\text{CDCl}_3$ ) spectrum of 1,3-bis(deamino)-1,3-diazido-2,5,6-tri-O-benzyl-4-O-(3',6'-di-O-benzyl-2'-O-(2''-N-benzyl-3'',4'',6''-tri-O-benzyl-dihydrostreptomycin (**13**))

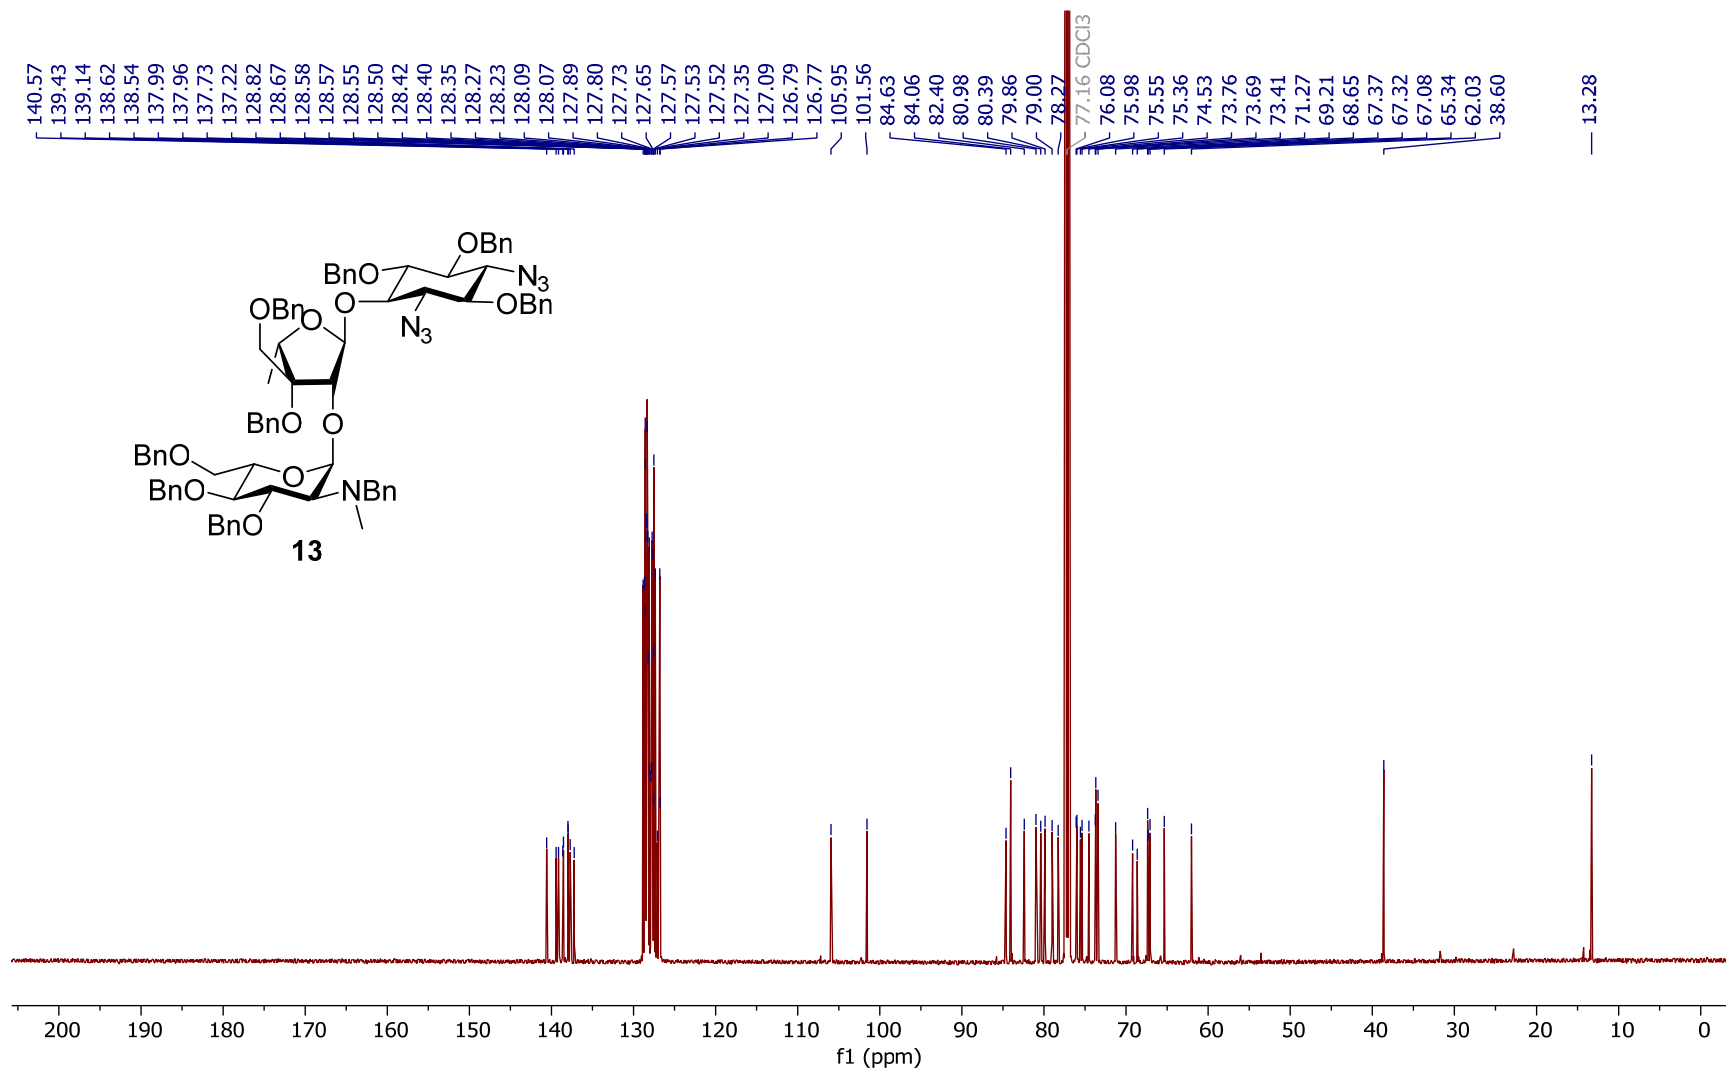

COSY NMR (500 MHz, CDCl<sub>3</sub>) spectrum of 1,3-bis(deamino)-1,3-diazo-2,5,6-tri-O-benzyl-4-O-(3',6'-di-O-benzyl-2'-O-(2''-N-benzyl-3'',4'',6''-tri-O-benzyl-dihydrostreptomycin (13)

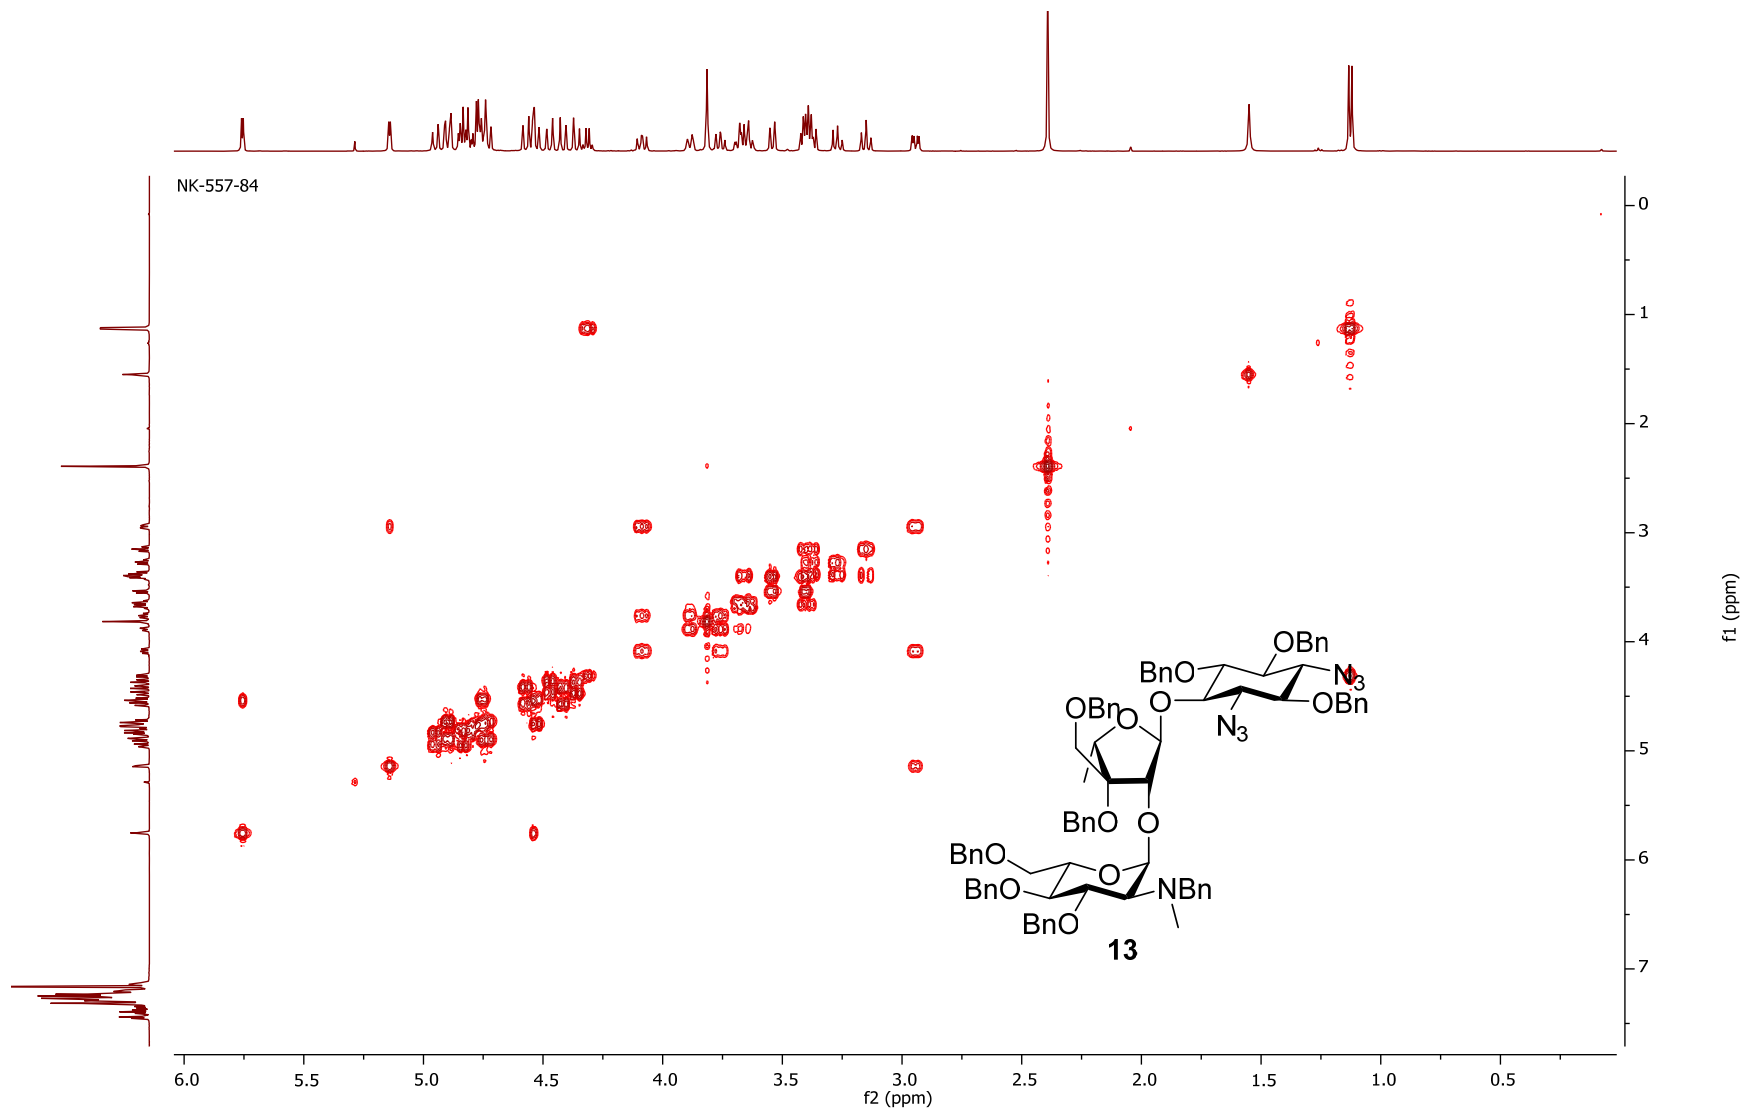

HSQC NMR (500 MHz, CDCl<sub>3</sub>) spectrum of 1,3-bis(deamino)-1,3-diazido-2,5,6-tri-O-benzyl-4-O-(3',6'-di-O-benzyl-2'-O-(2''-N-benzyl-3'',4'',6''-tri-O-benzyl-dihydrostreptomycin (13)

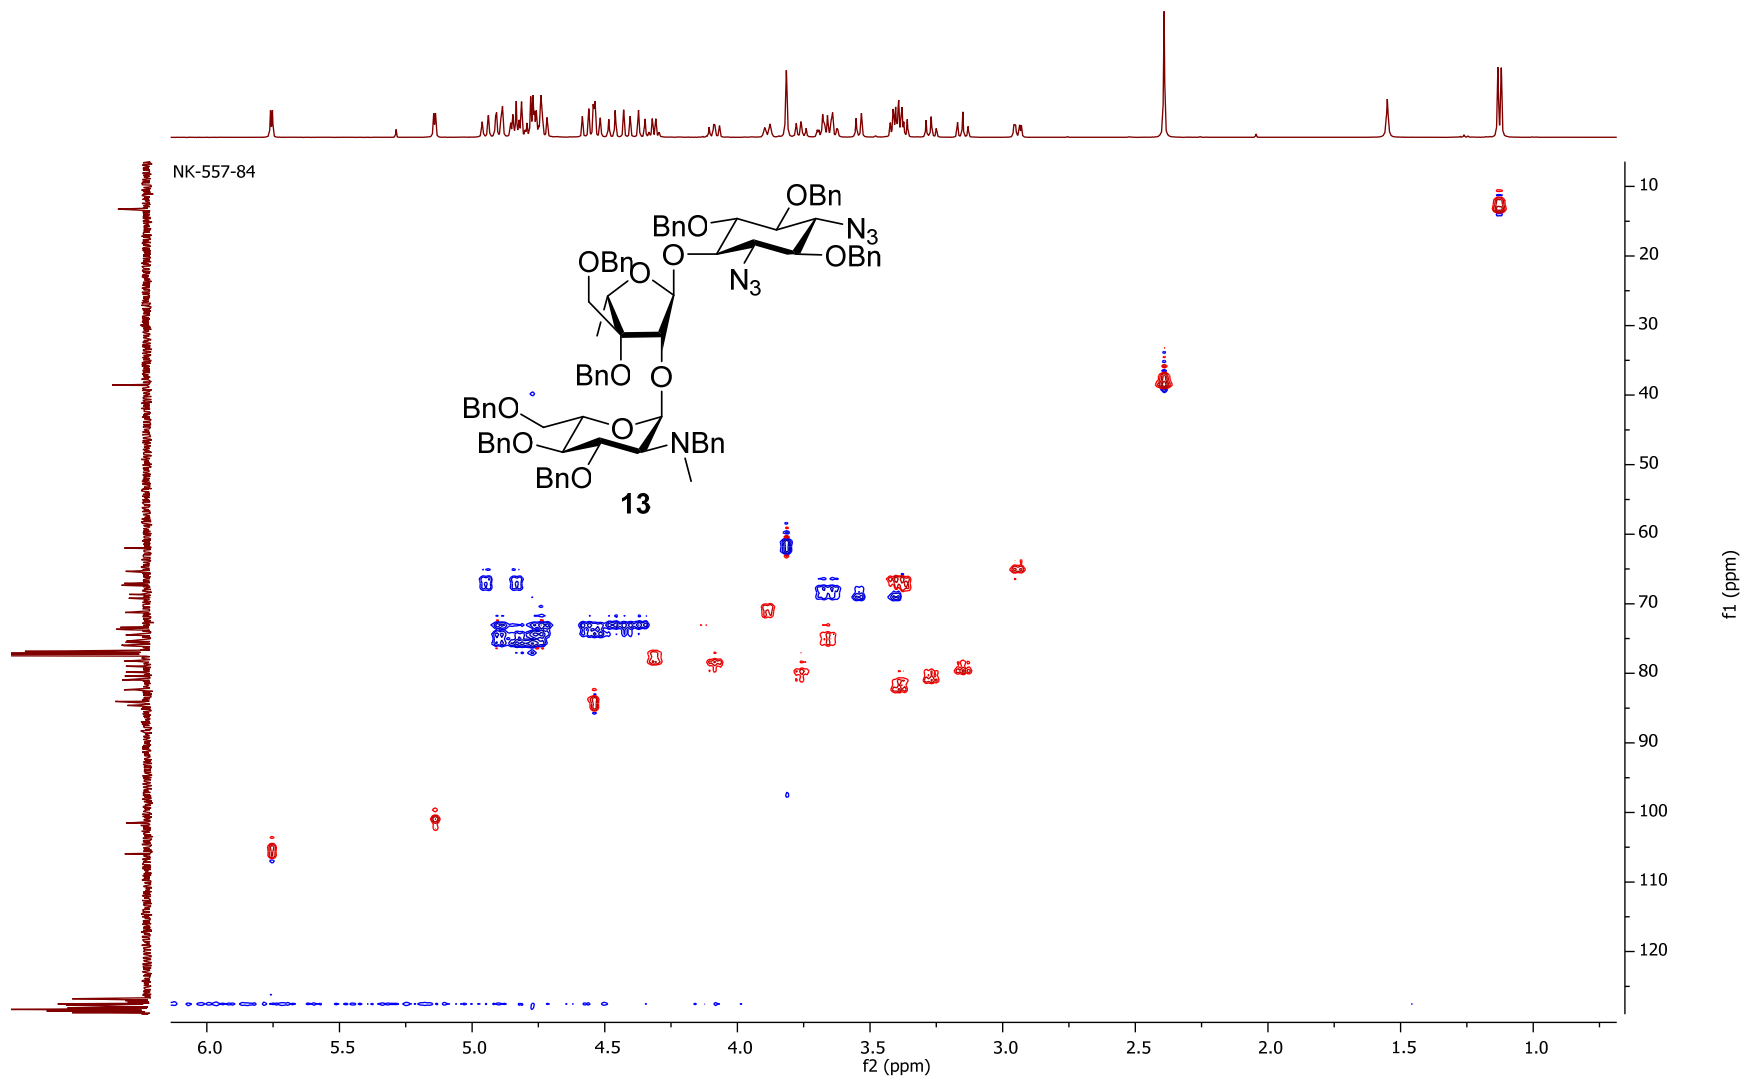

$^1\text{H}$  NMR (900 MHz,  $\text{CDCl}_3$ ) spectrum of 1,3-bis(deamino)-1,3-diazido-4-O-acetyl-2,5,6-tri-O-benzylstreptamine (**14**)

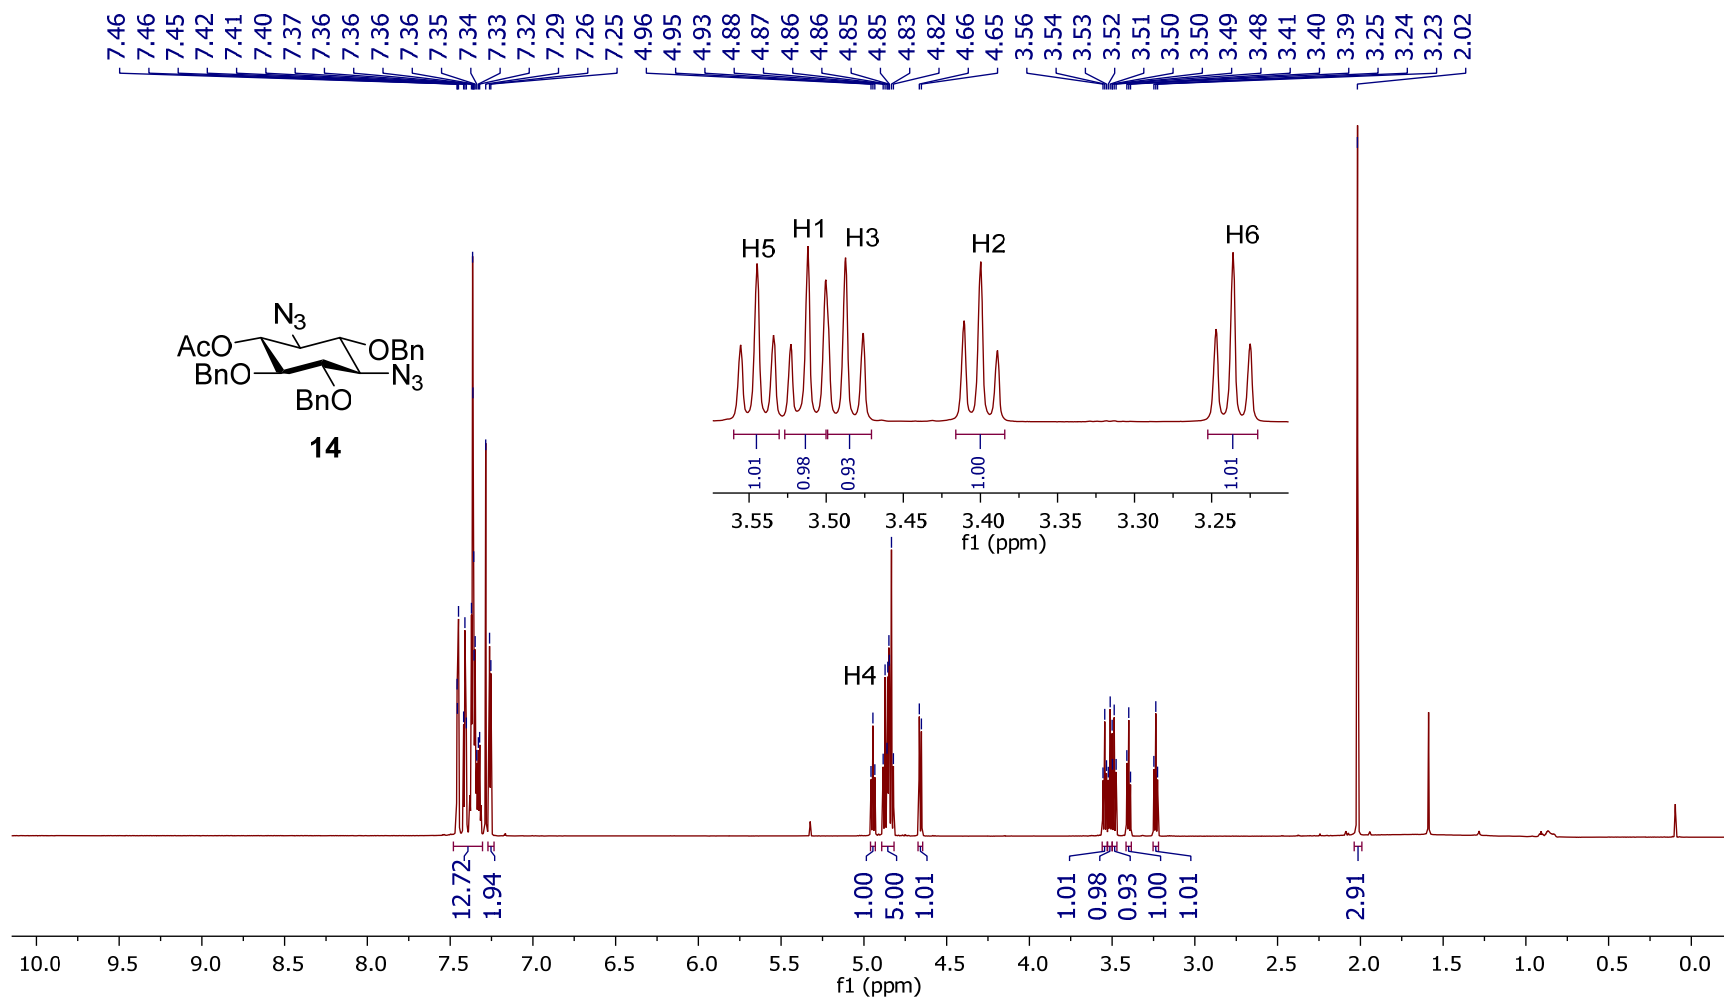



$^{13}\text{C}\{^1\text{H}\}$  NMR (226 MHz,  $\text{CDCl}_3$ ) spectrum of 4-O-acetyl-1,3-di(deamino)-1,3-diazido-2,5,6-tri-O-benzylstreptamine (**14**)

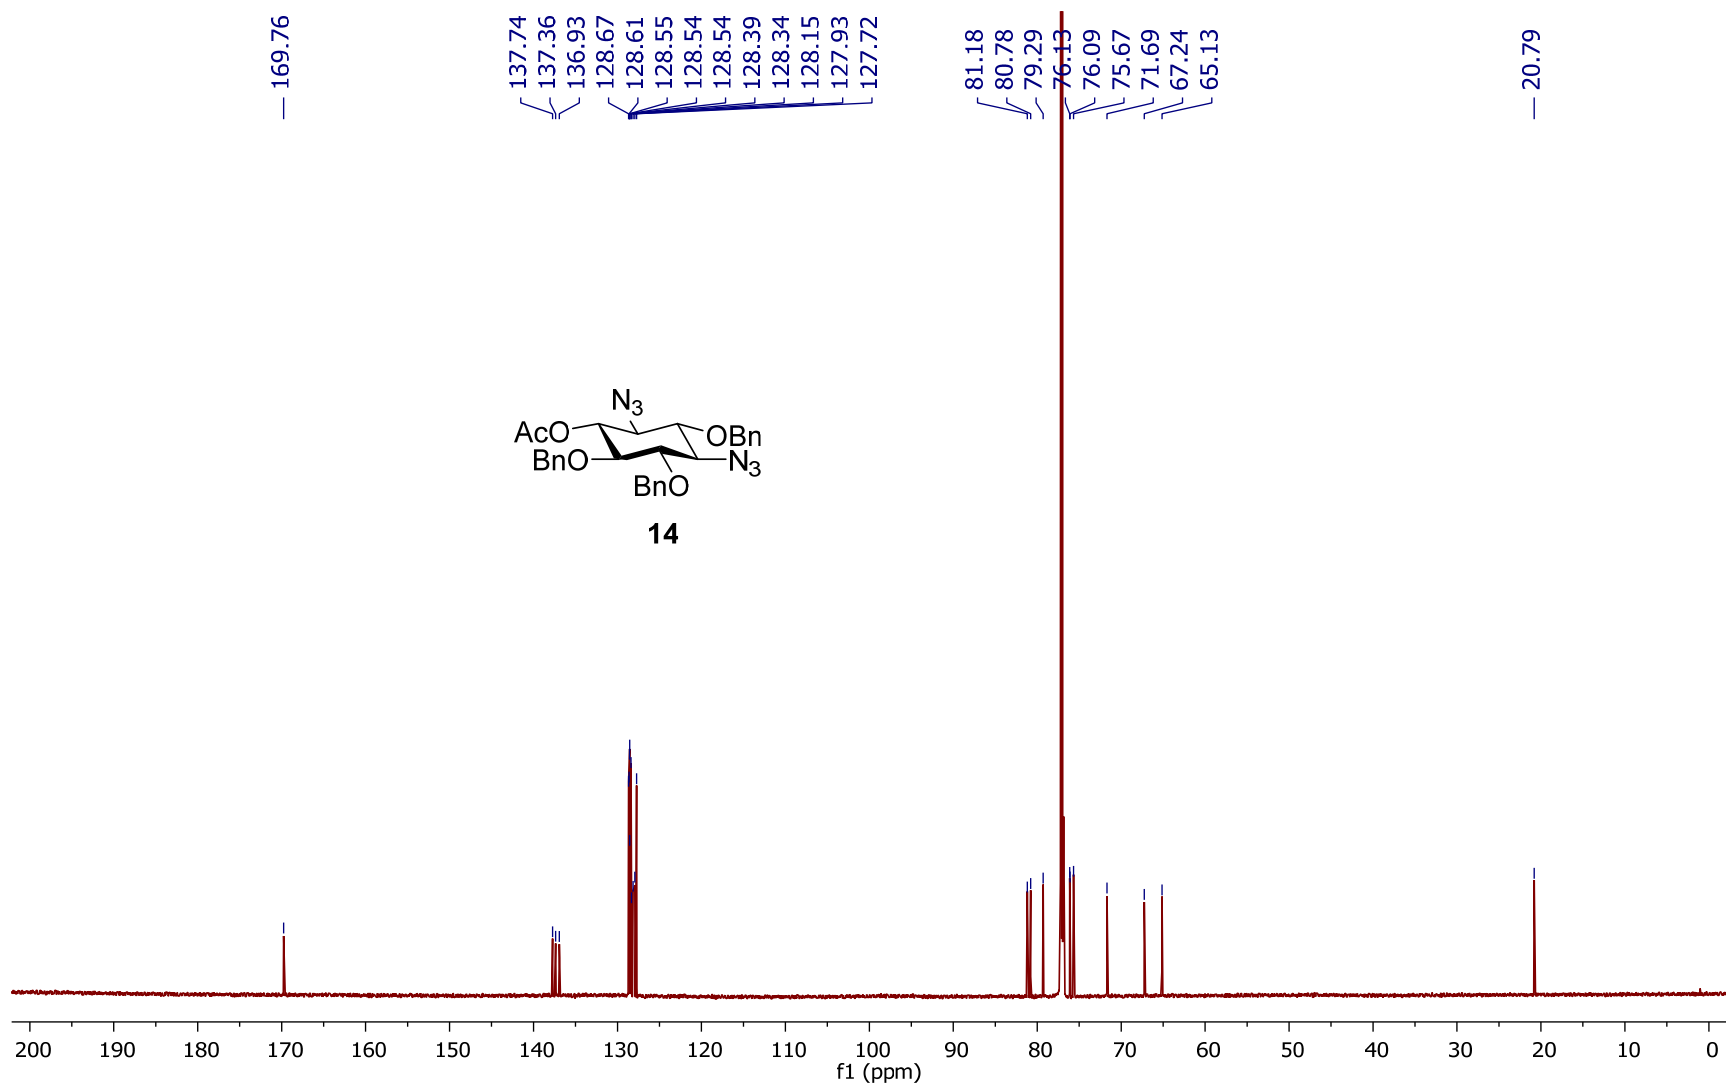

COSY NMR (900 MHz, CDCl<sub>3</sub>) spectrum of 4-O-acetyl-1,3-di(deamino)-1,3-diazido-2,5,6-tri-O-benzylstreptamine (**14**)

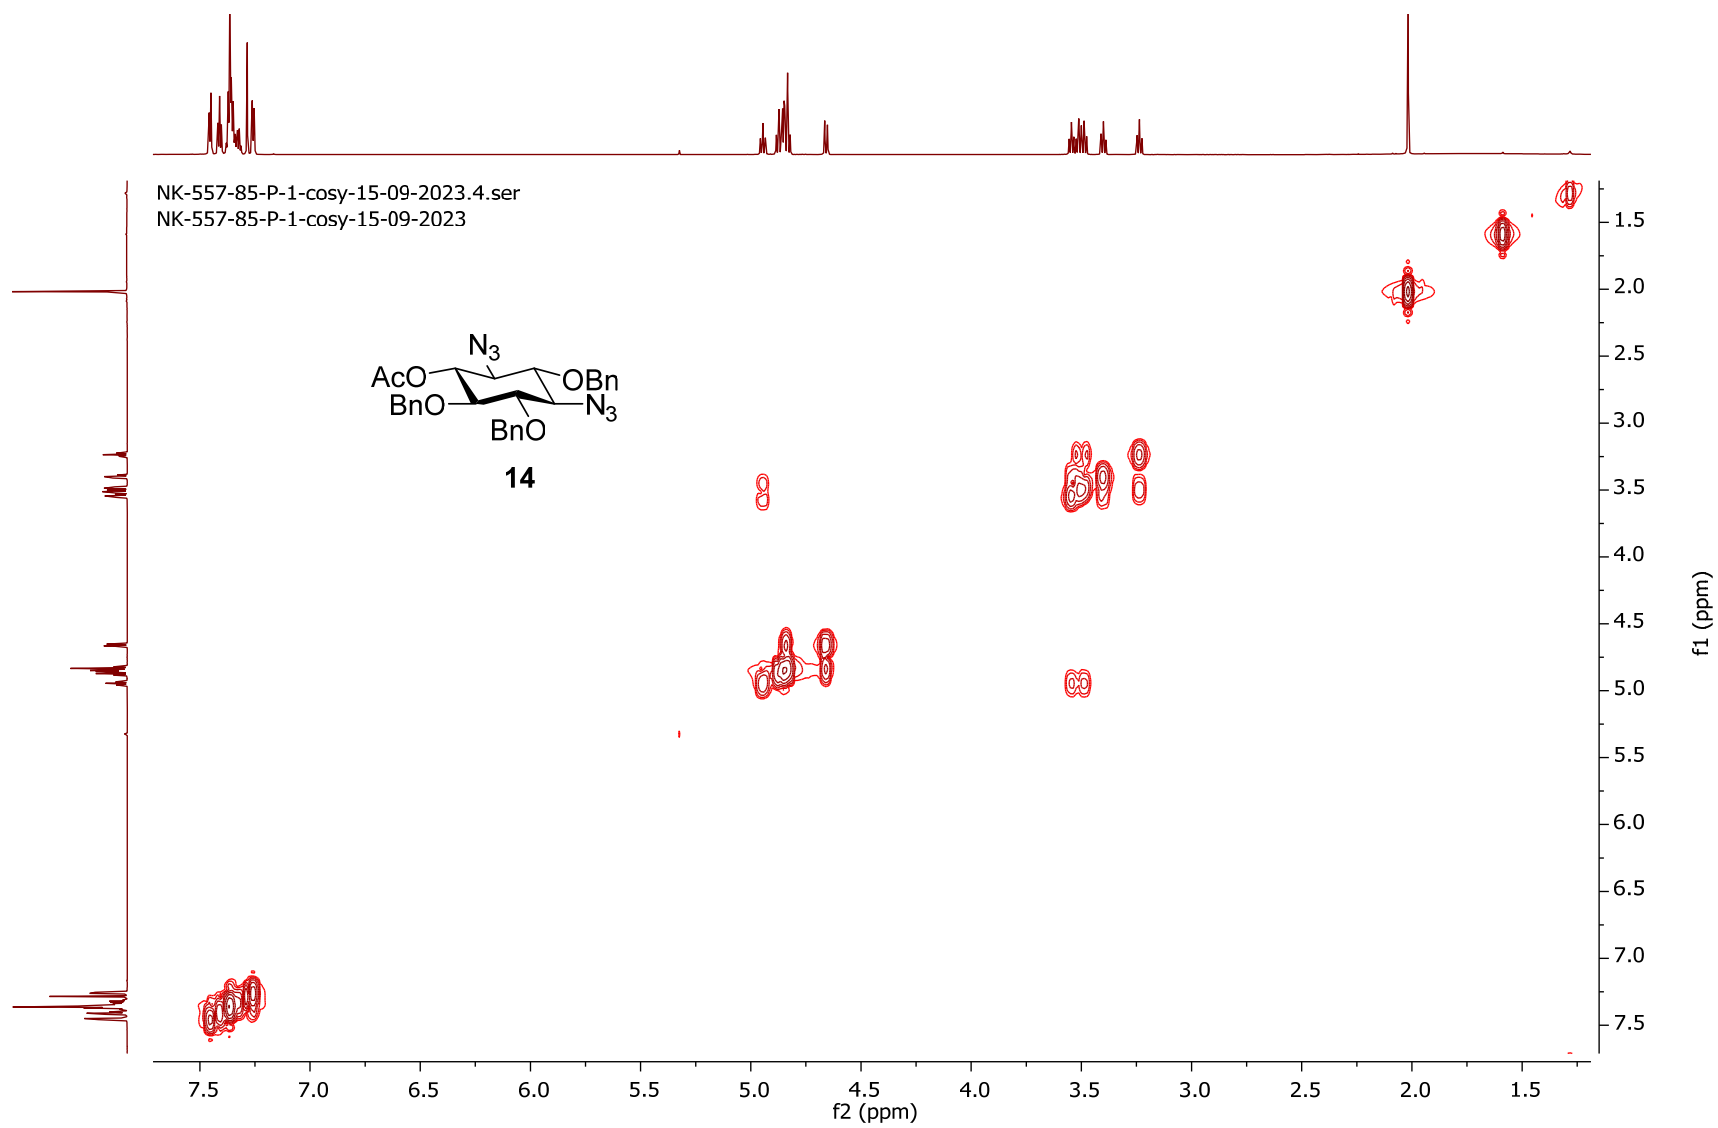

HSQC NMR (900 MHz, CDCl<sub>3</sub>) spectrum of 4-O-acetyl-1,3-di(deamino)-1,3-diazido-2,5,6-tri-O-benzylstreptamine (**14**)

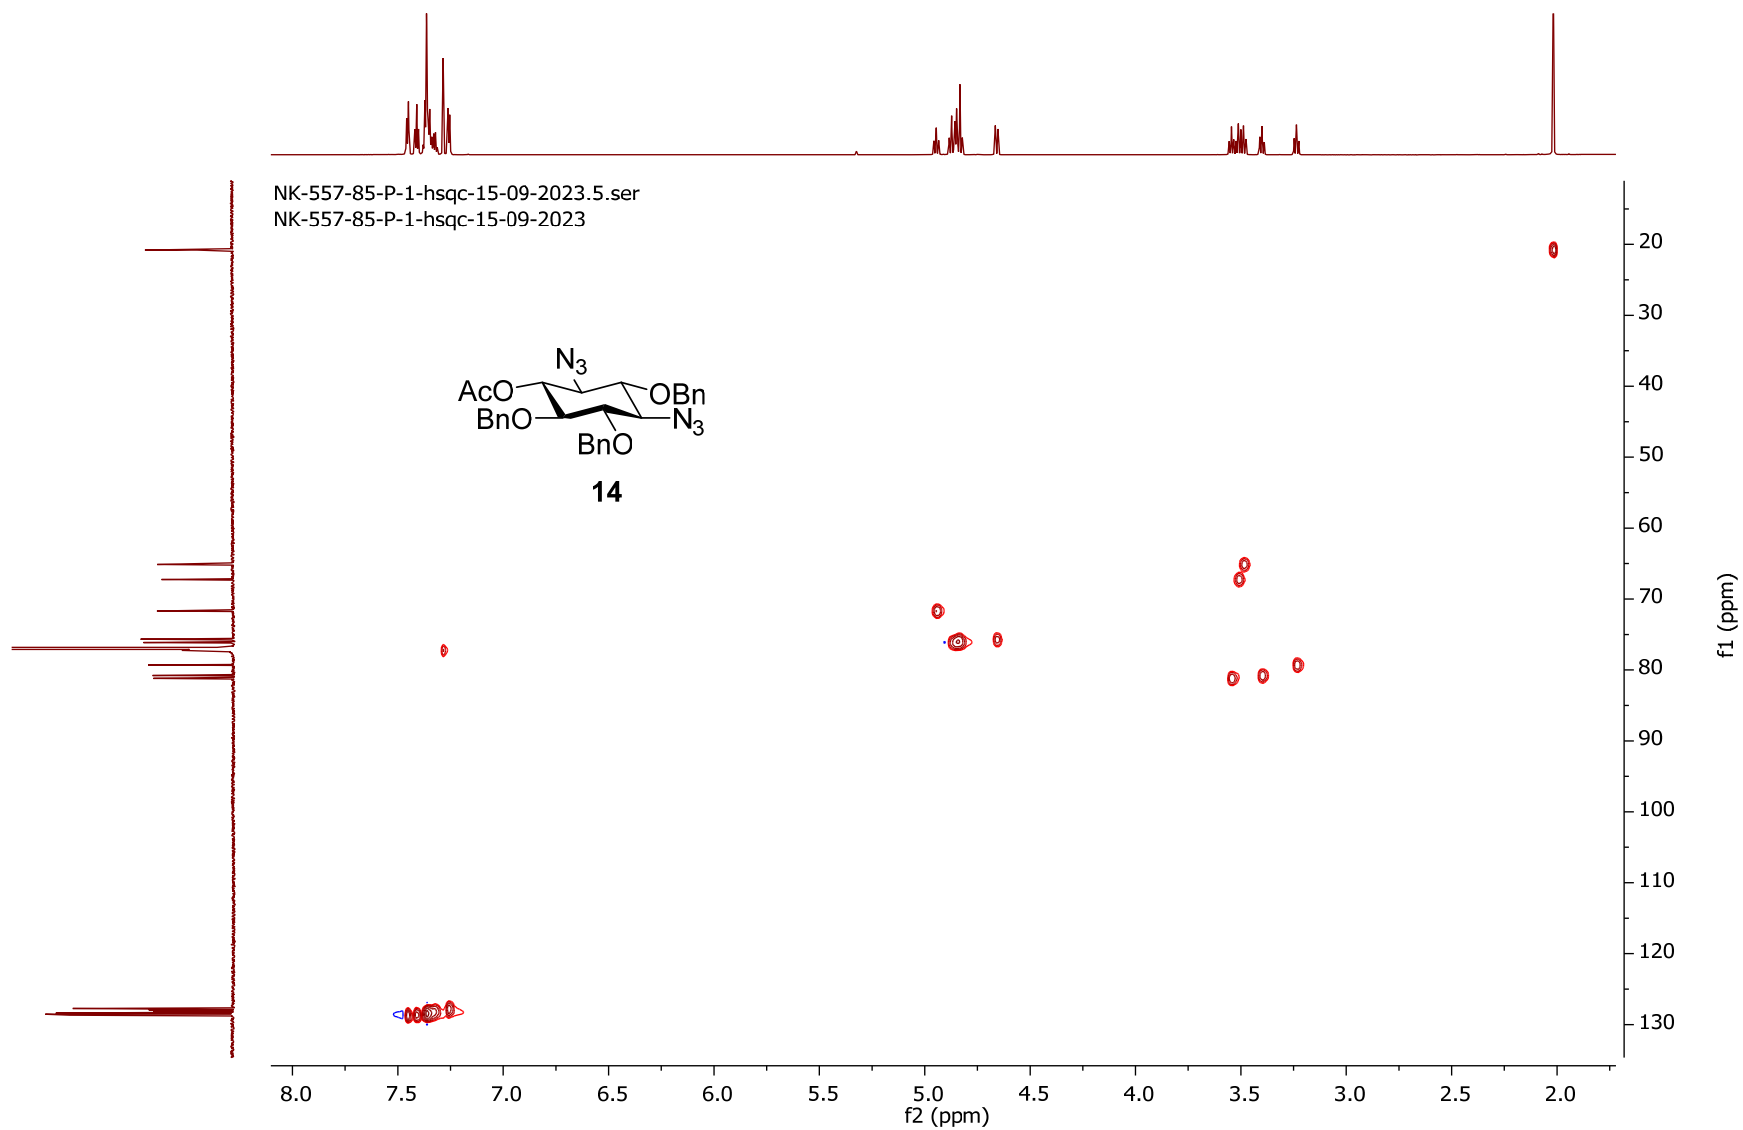

<sup>1</sup>H NMR (500 MHz, CDCl<sub>3</sub>) spectrum of Methyl 3',6'-di-O-benzyl-2-O-(2''-N-benzyl-3'',4'',6''-tri-O-benzyl)-β-streptobiosaminide (**15**)

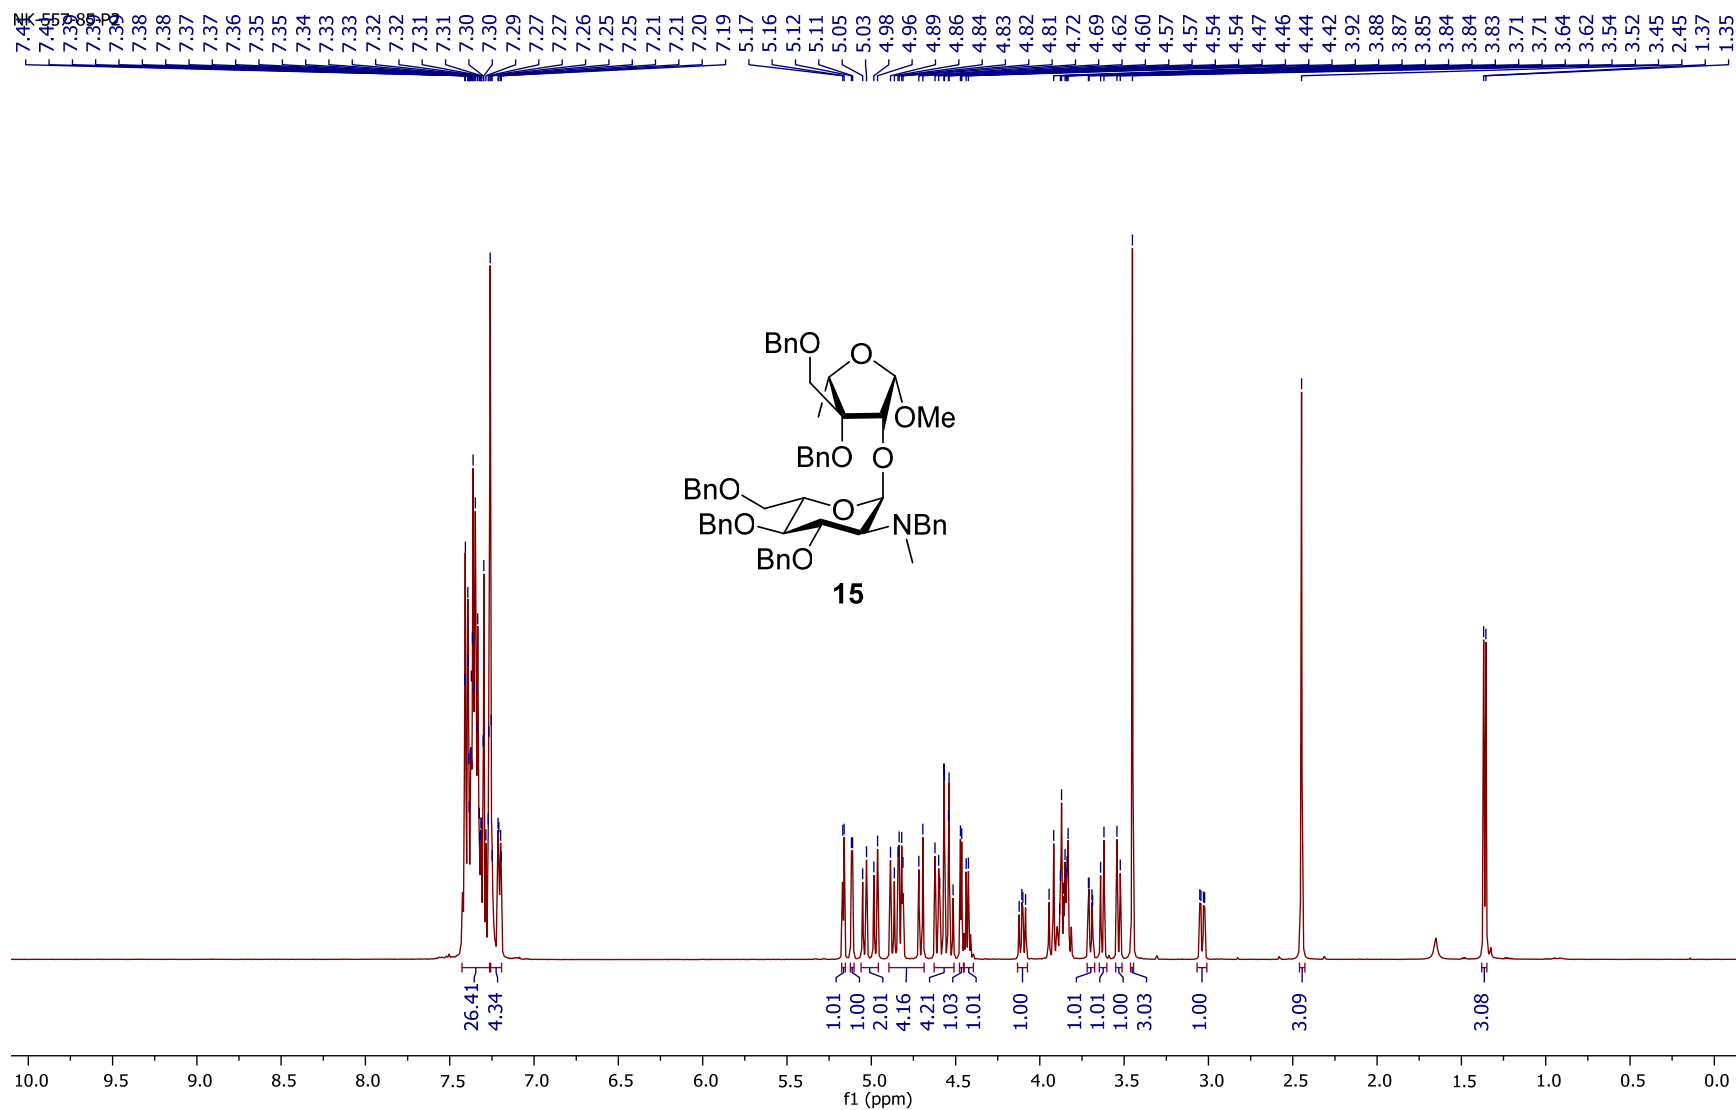

$^{13}\text{C}\{^1\text{H}\}$  NMR (126 MHz,  $\text{CDCl}_3$ ) spectrum of Methyl 3',6'-di-O-benzyl-2-O-(2''-N-benzyl-3'',4'',6''-tri-O-benzyl)- $\beta$ -streptobiosaminide (15)

NK-557-85-P2

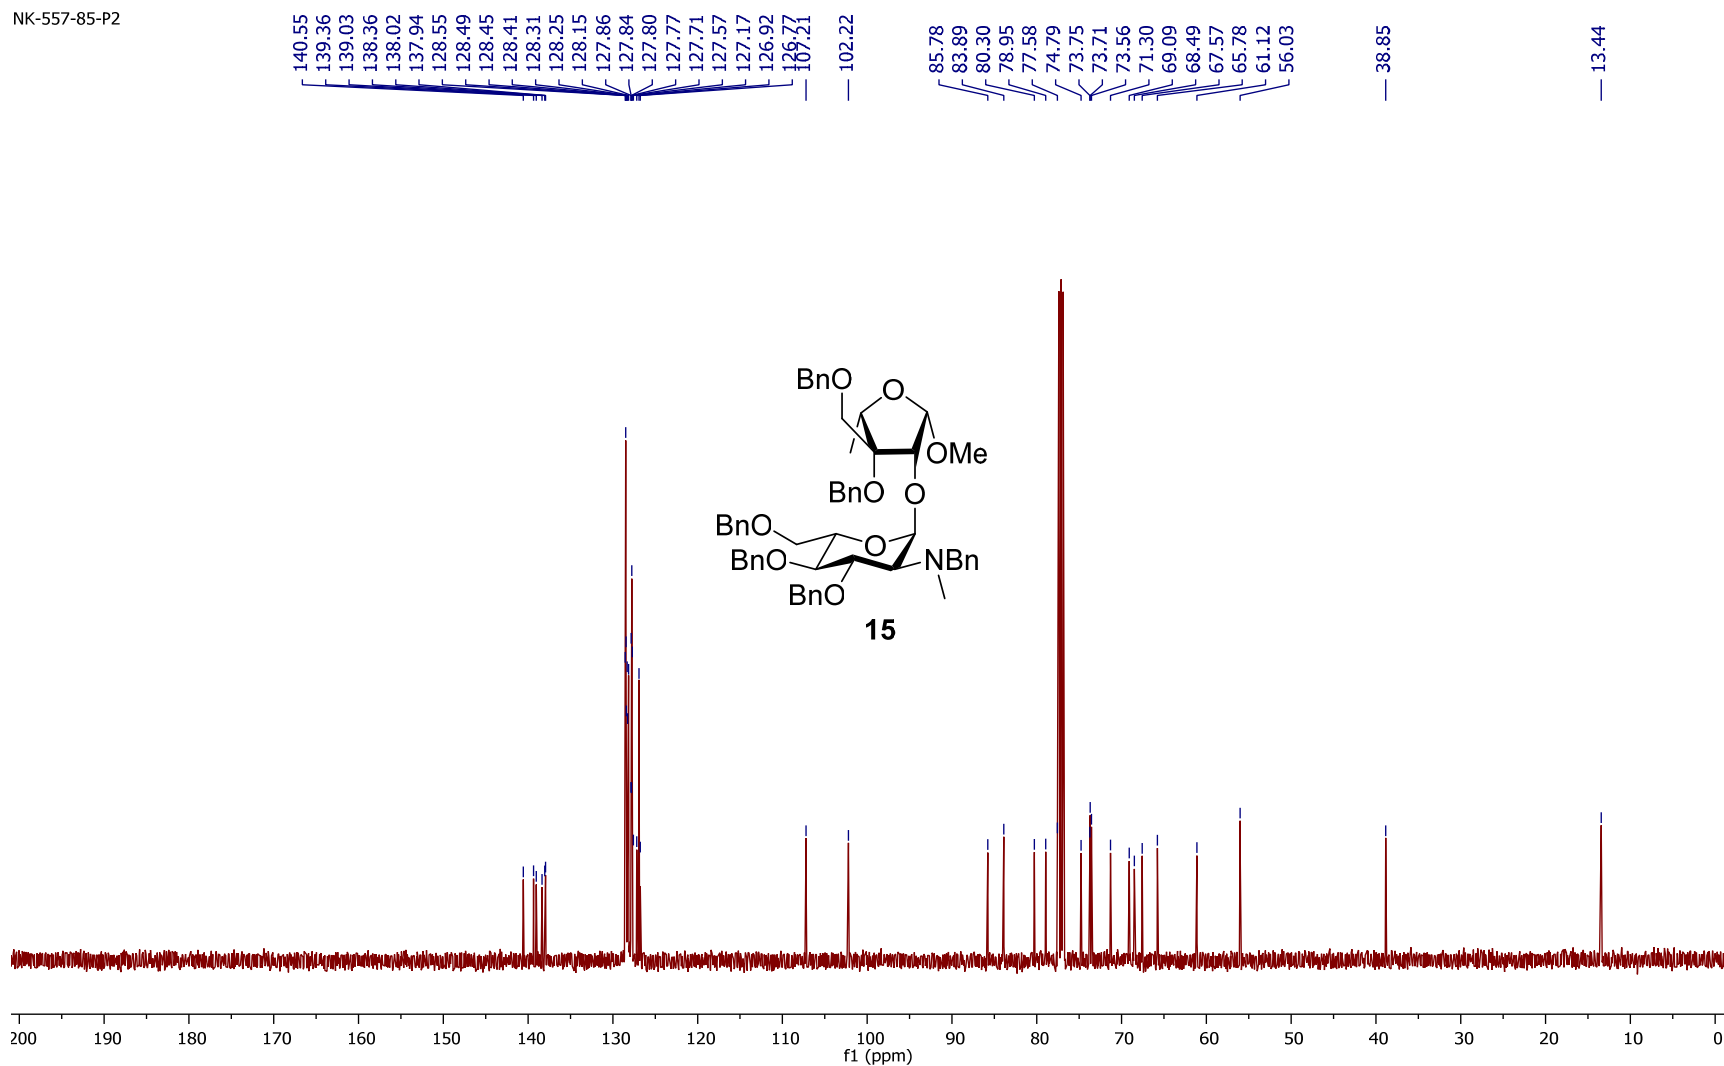

COSY NMR (500 MHz, CDCl<sub>3</sub>) spectrum of Methyl 3',6'-di-O-benzyl-2-O-(2''-N-benzyl-3'',4'',6''-tri-O-benzyl)-β-streptobiosaminide (15)

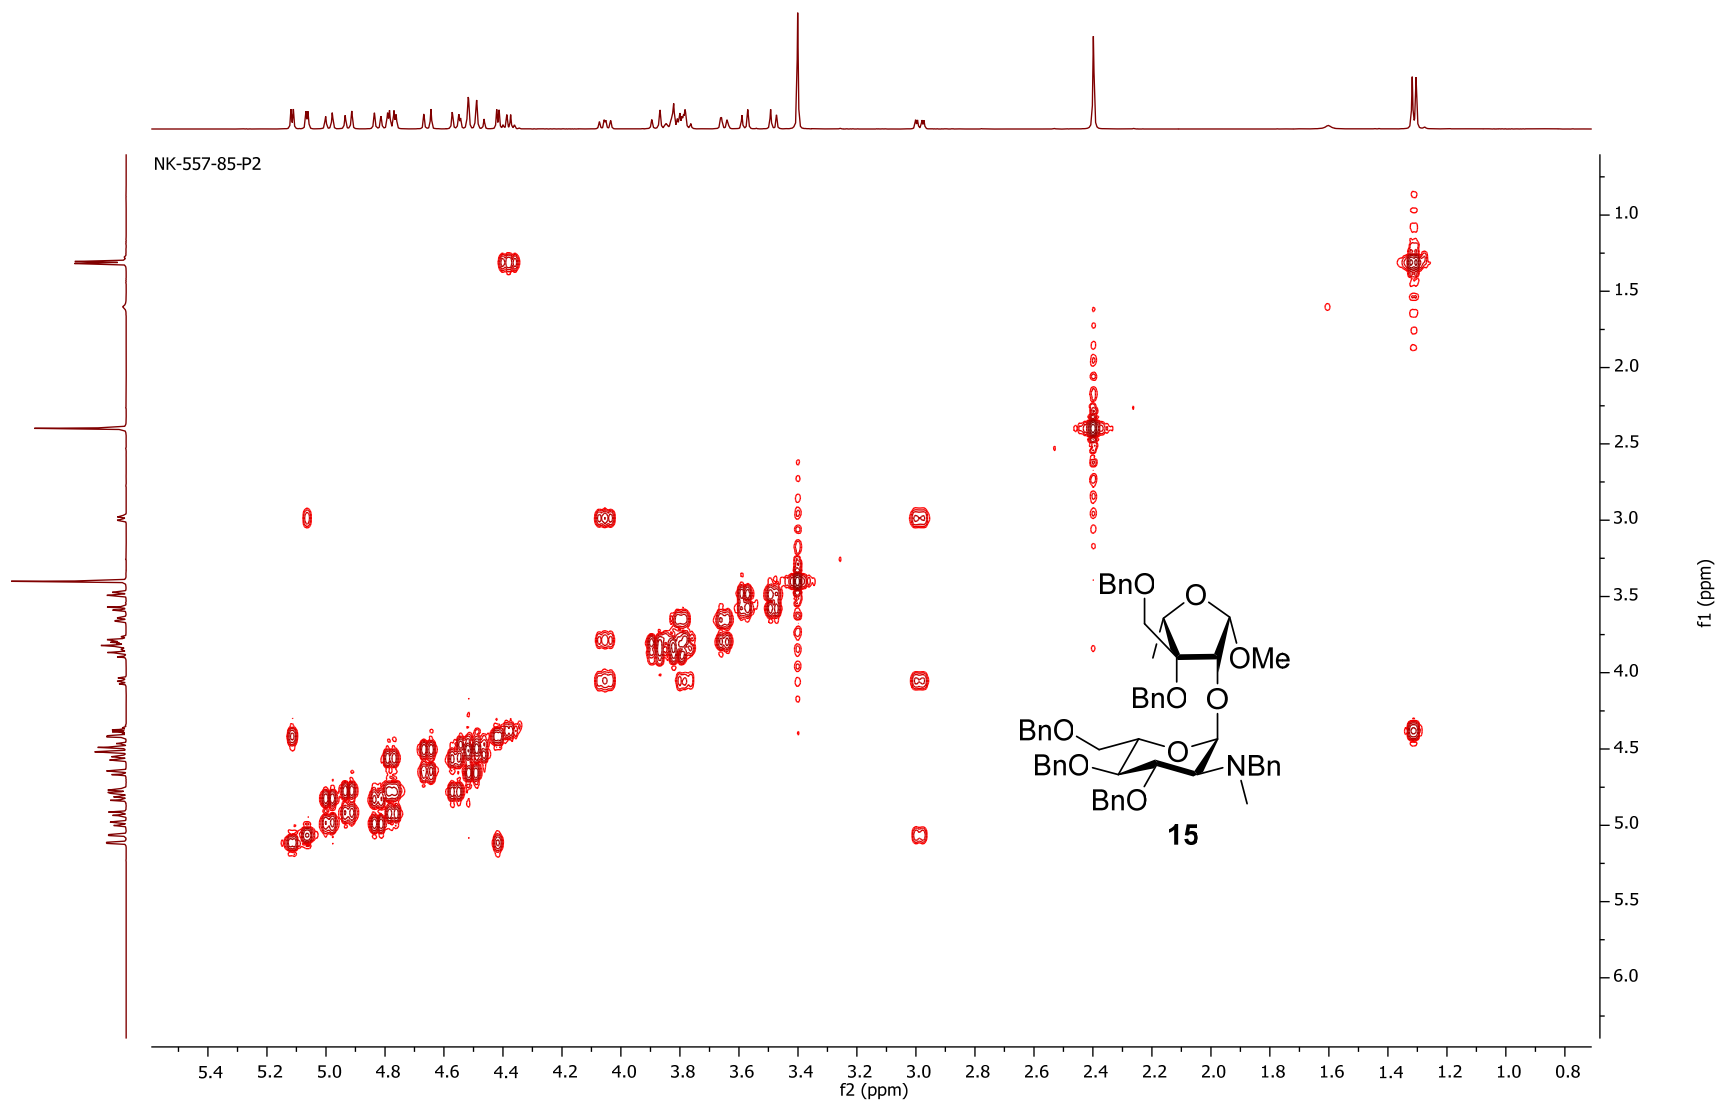



$^1\text{H}$  NMR (900 MHz,  $\text{CDCl}_3$ ) spectrum of 1,3-Di(deamino)-1,3-diazido-2,5,6-tri-O-benzyl streptamine (**16**)

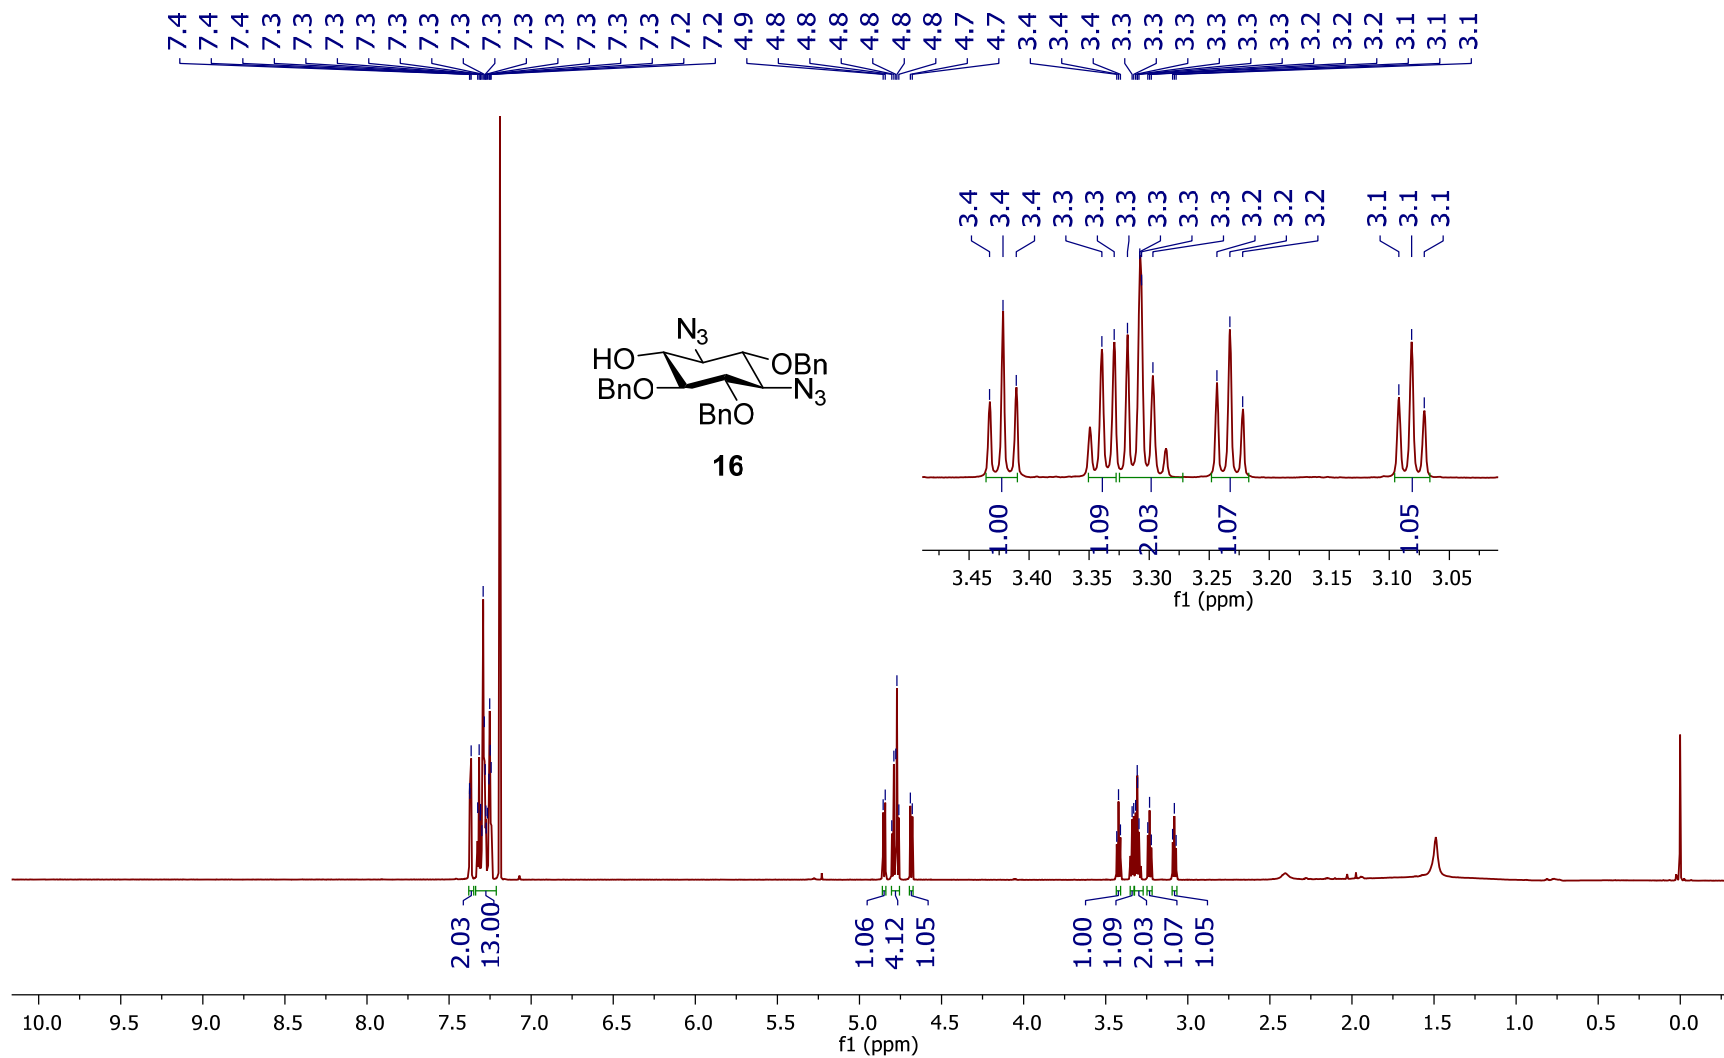



$^{13}\text{C}\{^1\text{H}\}$  NMR (226 MHz,  $\text{CDCl}_3$ ) spectrum of 1,3-Di(deamino)-1,3-diazido-2,5,6-tri-O-benzyl streptamine (**16**)

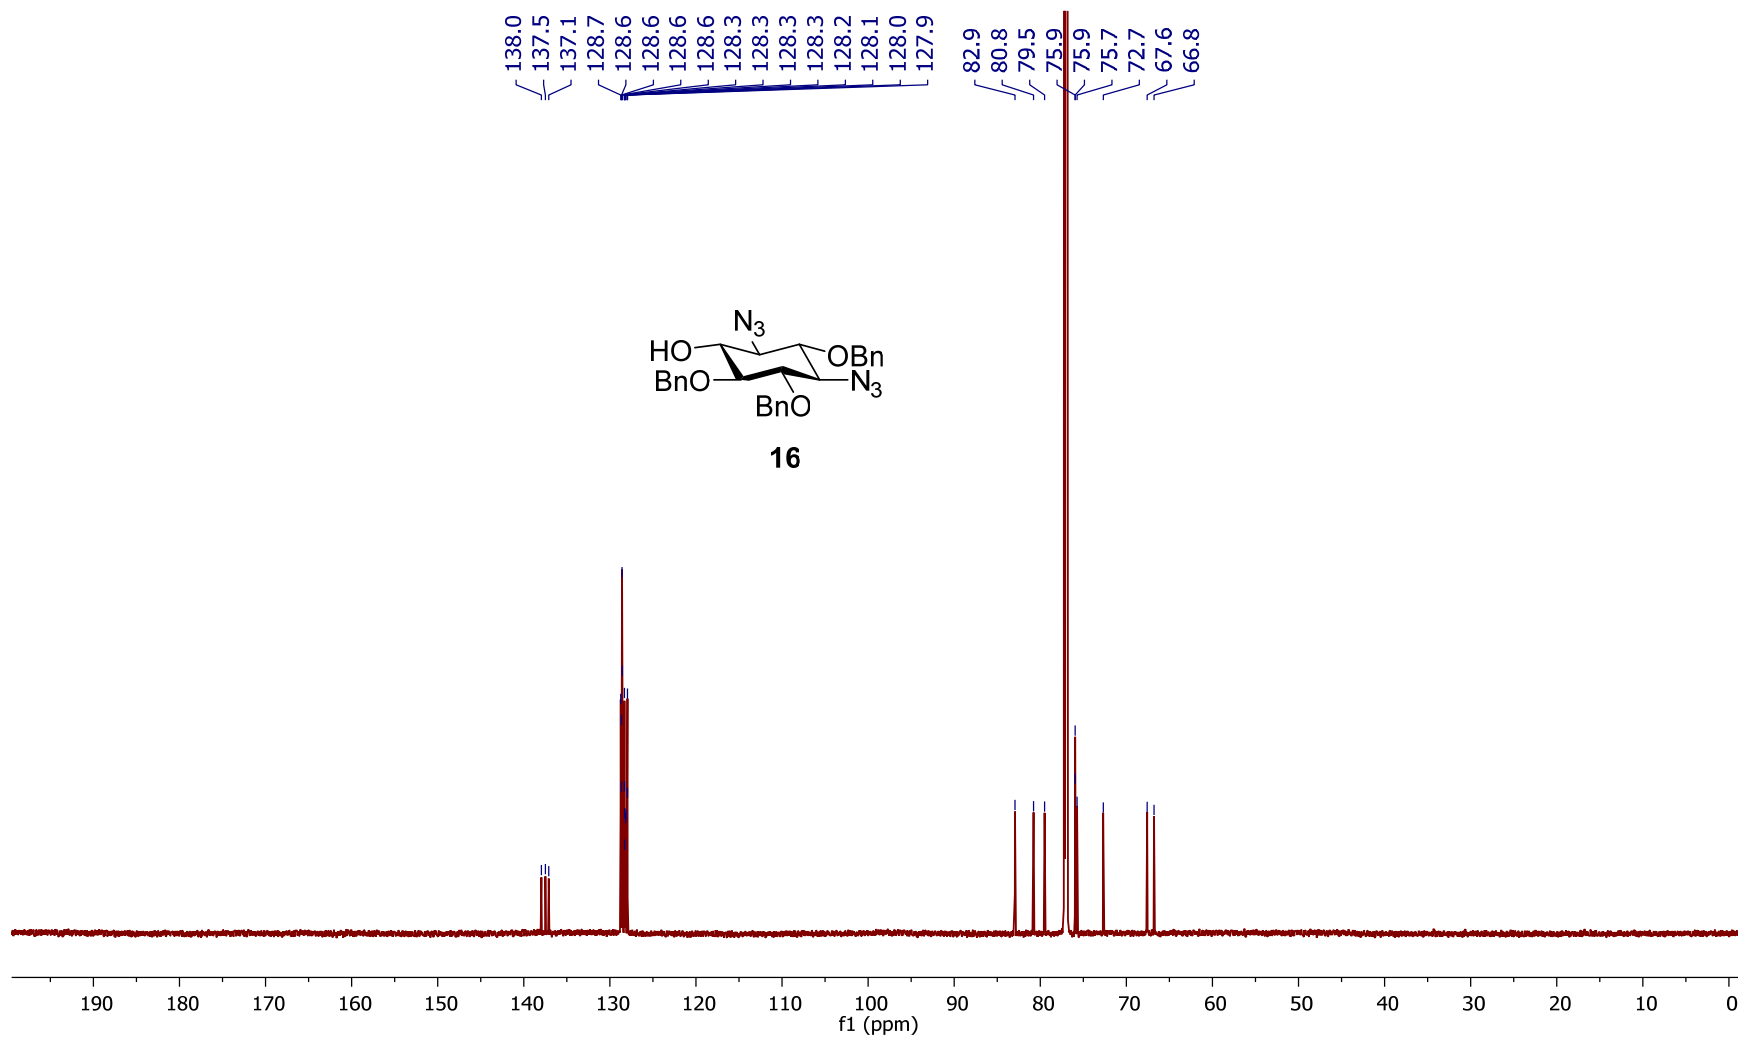

COSY NMR (900 MHz, CDCl<sub>3</sub>) spectrum of 1,3-Di(deamino)-1,3-diazido-2,5,6-tri-O-benzyl streptamine (**16**)

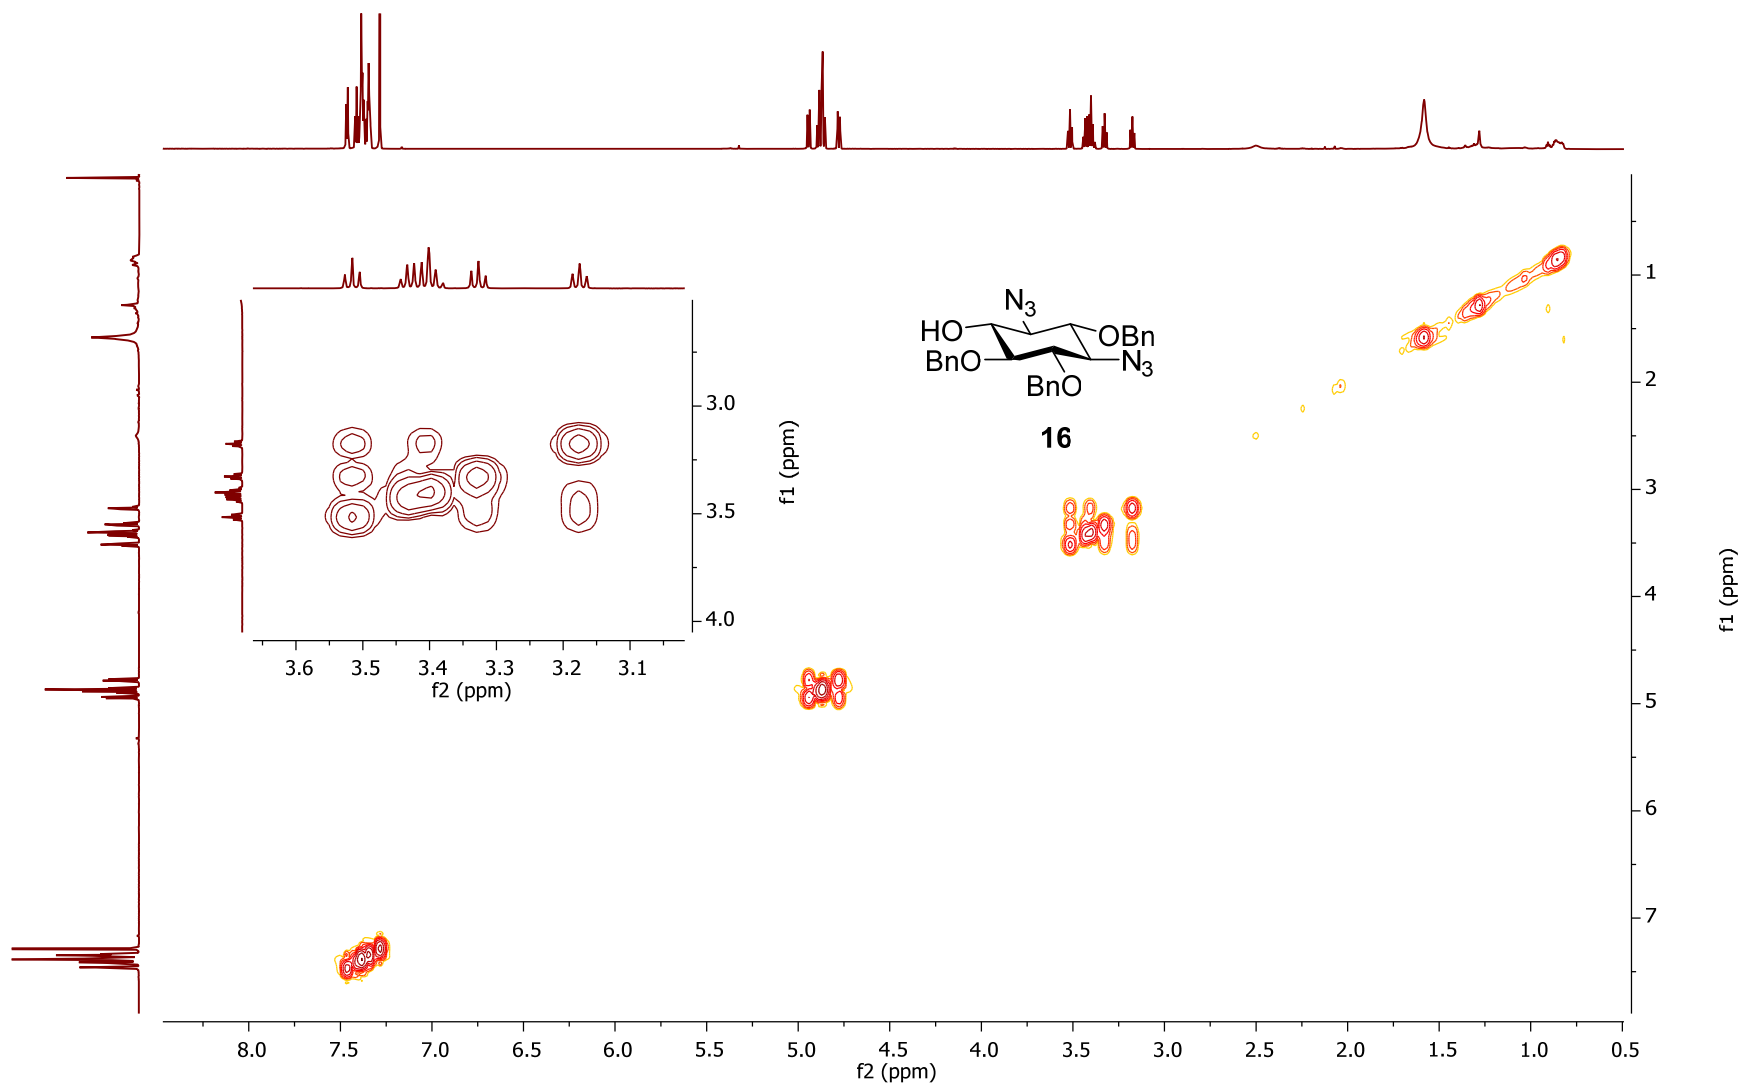

HSQC NMR (900 MHz, CDCl<sub>3</sub>) spectrum of 1,3-Di(deamino)-1,3-diazido-2,5,6-tri-O-benzyl streptamine (**16**)

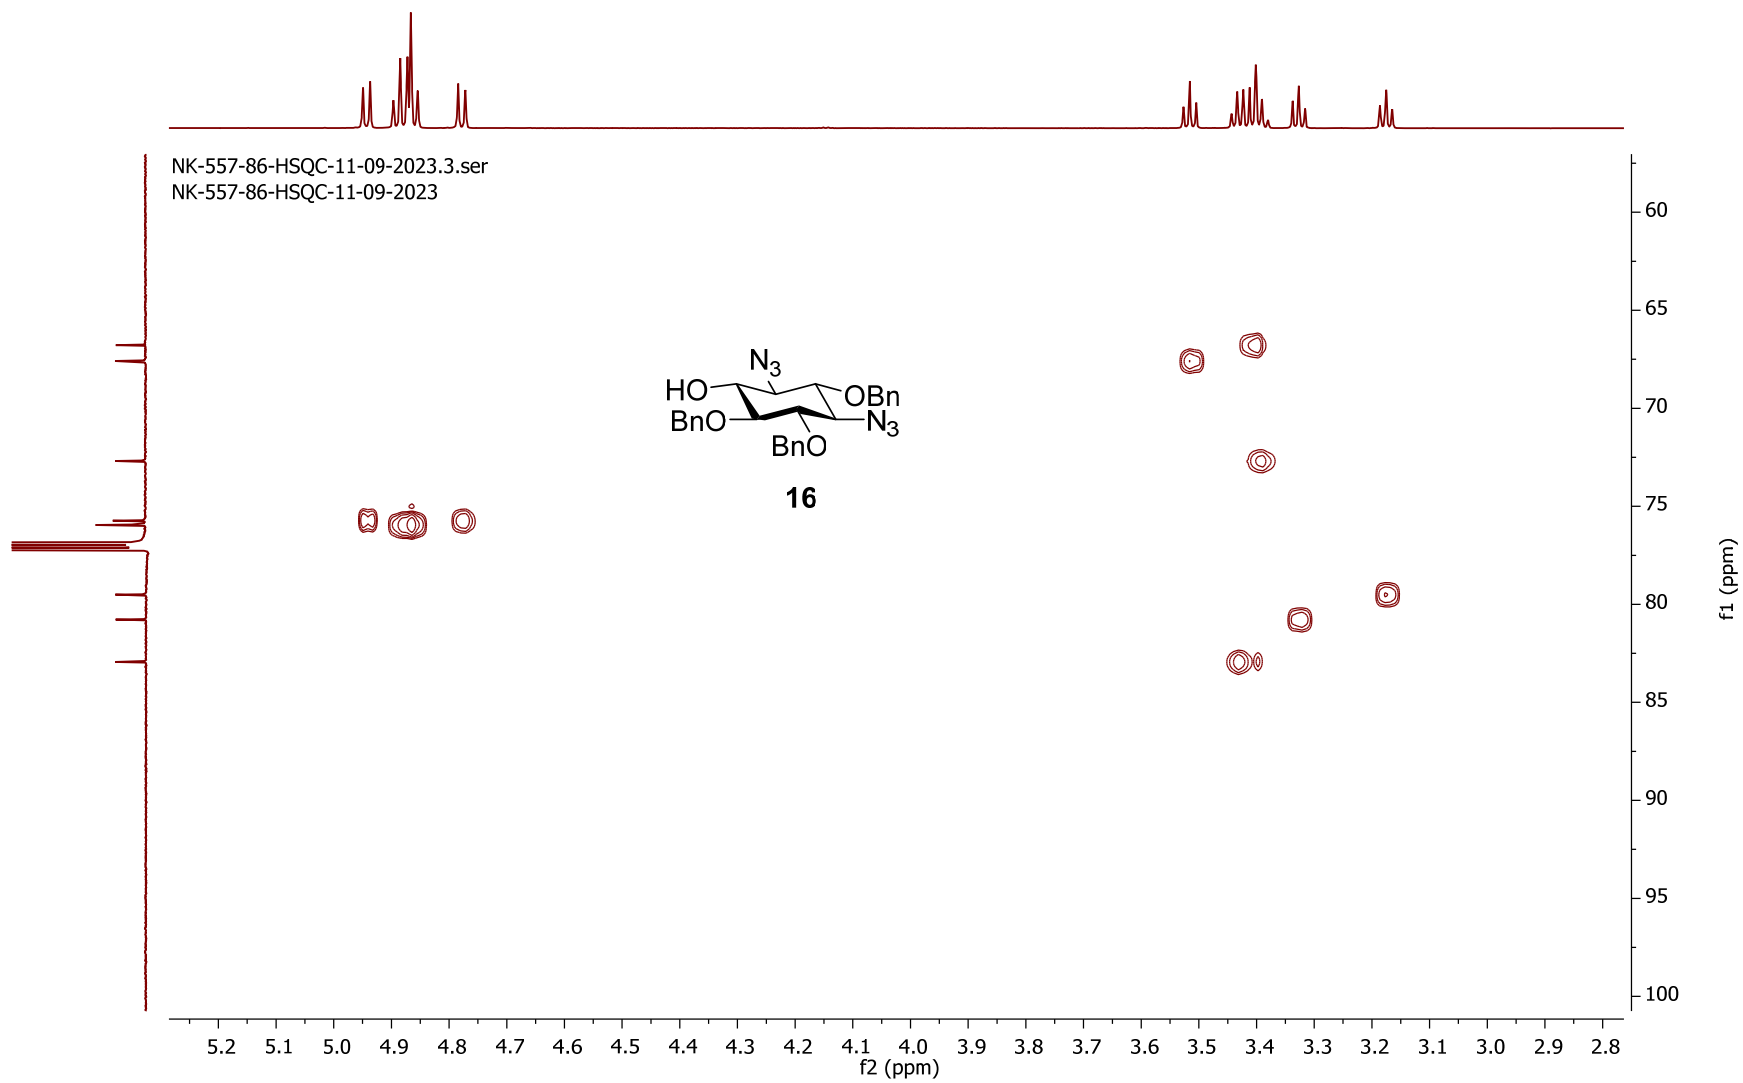

<sup>1</sup>H NMR Spectra (500 MHz, Benzene-d<sub>6</sub>) of 1,3-Di(deamino)-1,3-diazido-2,6-di-O-benzylstreptamine (**17**)

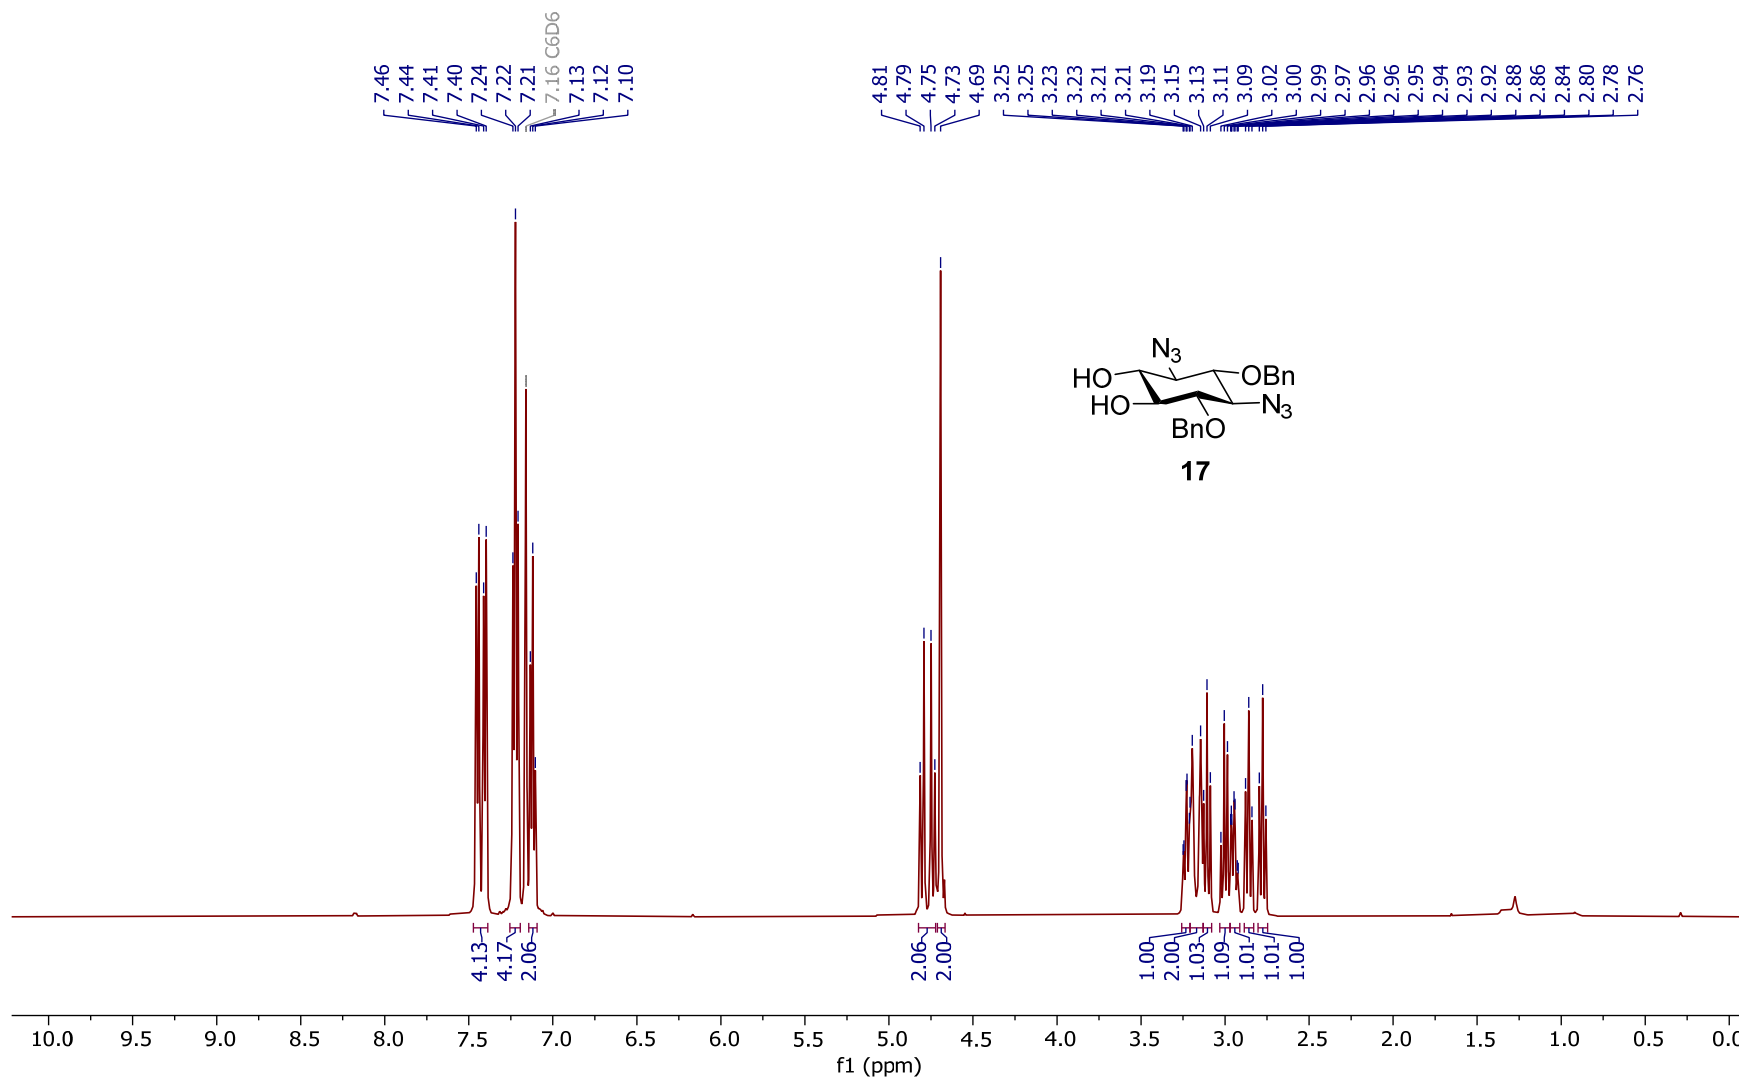

$^{13}\text{C}\{^1\text{H}\}$  NMR Spectra (126 MHz, Benzene- $d_6$ ) of 1,3-Di(deamino)-1,3-diazido-2,6-di-O-benzylstreptamine (**17**)

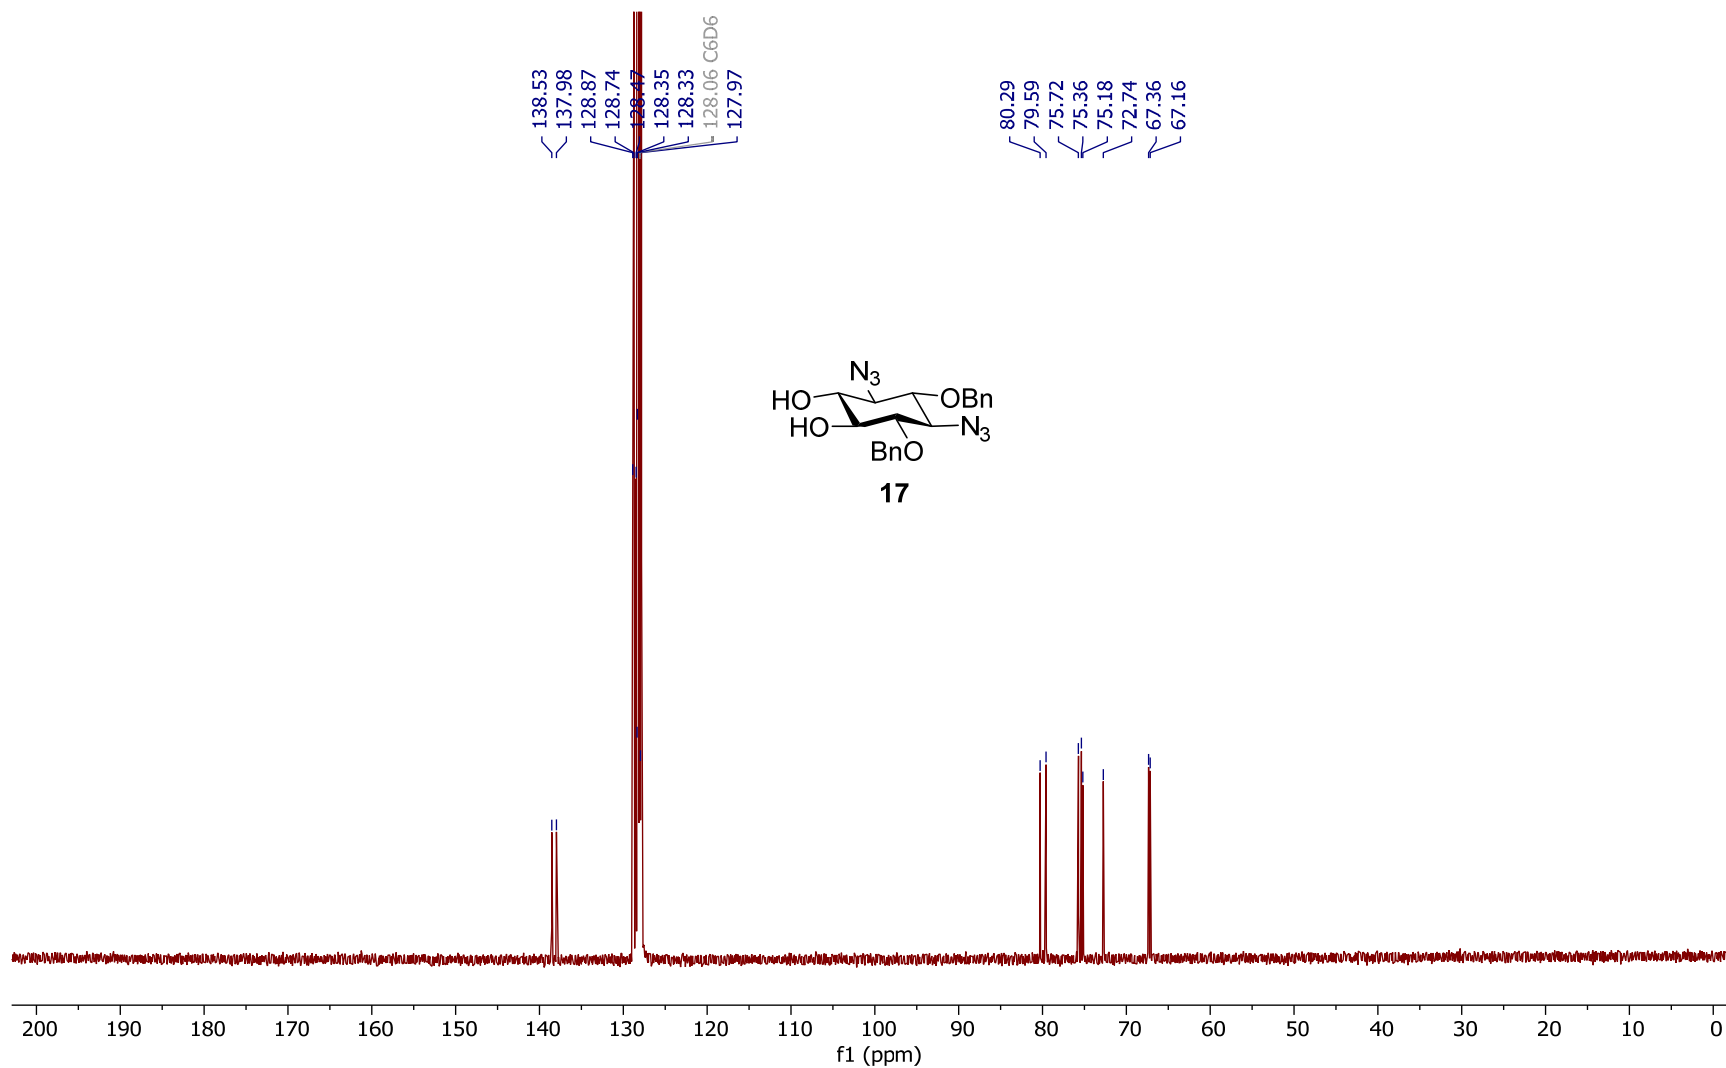

$^1\text{H}$ - $^1\text{H}$  COSY NMR Spectra (500 MHz, Benzene- $d_6$ ) of 1,3-Di(deamino)-1,3-diazido-2,6-di-O-benzylstreptamine (**17**)

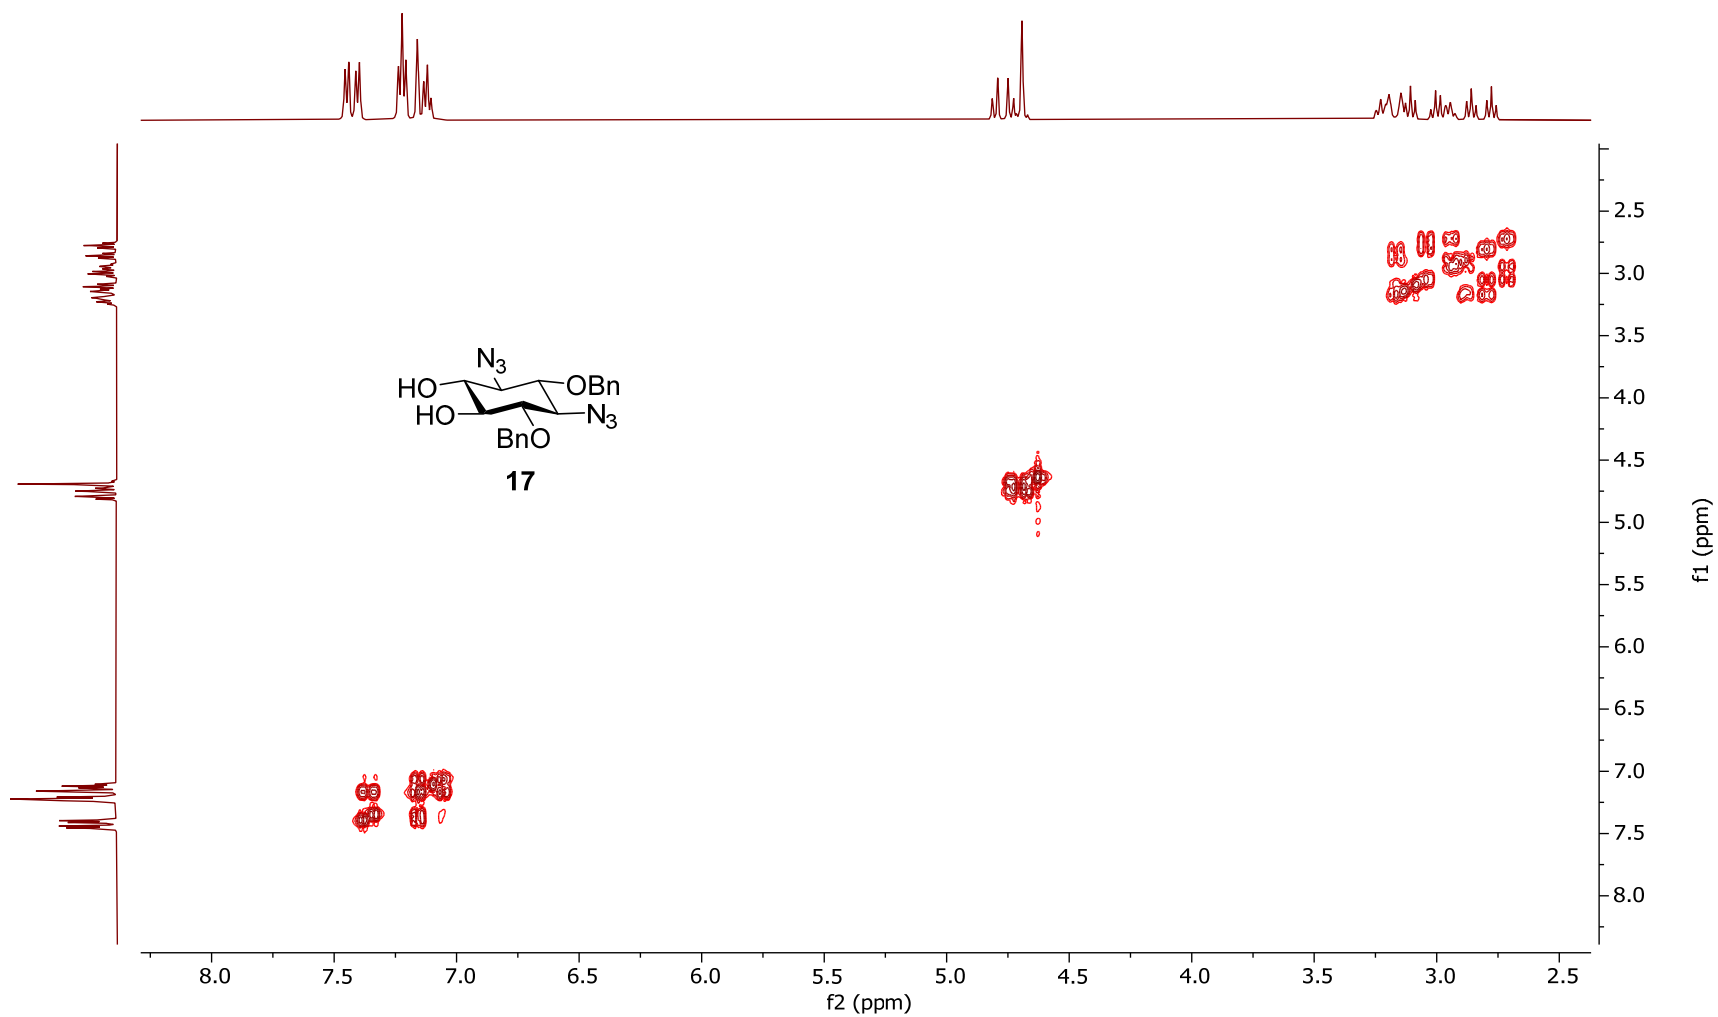

HSQC NMR Spectra (500 MHz, Benzene- $d_6$ ) of 1,3-Di(deamino)-1,3-diazido-2,6-di-O-benzylstreptamine (**17**)

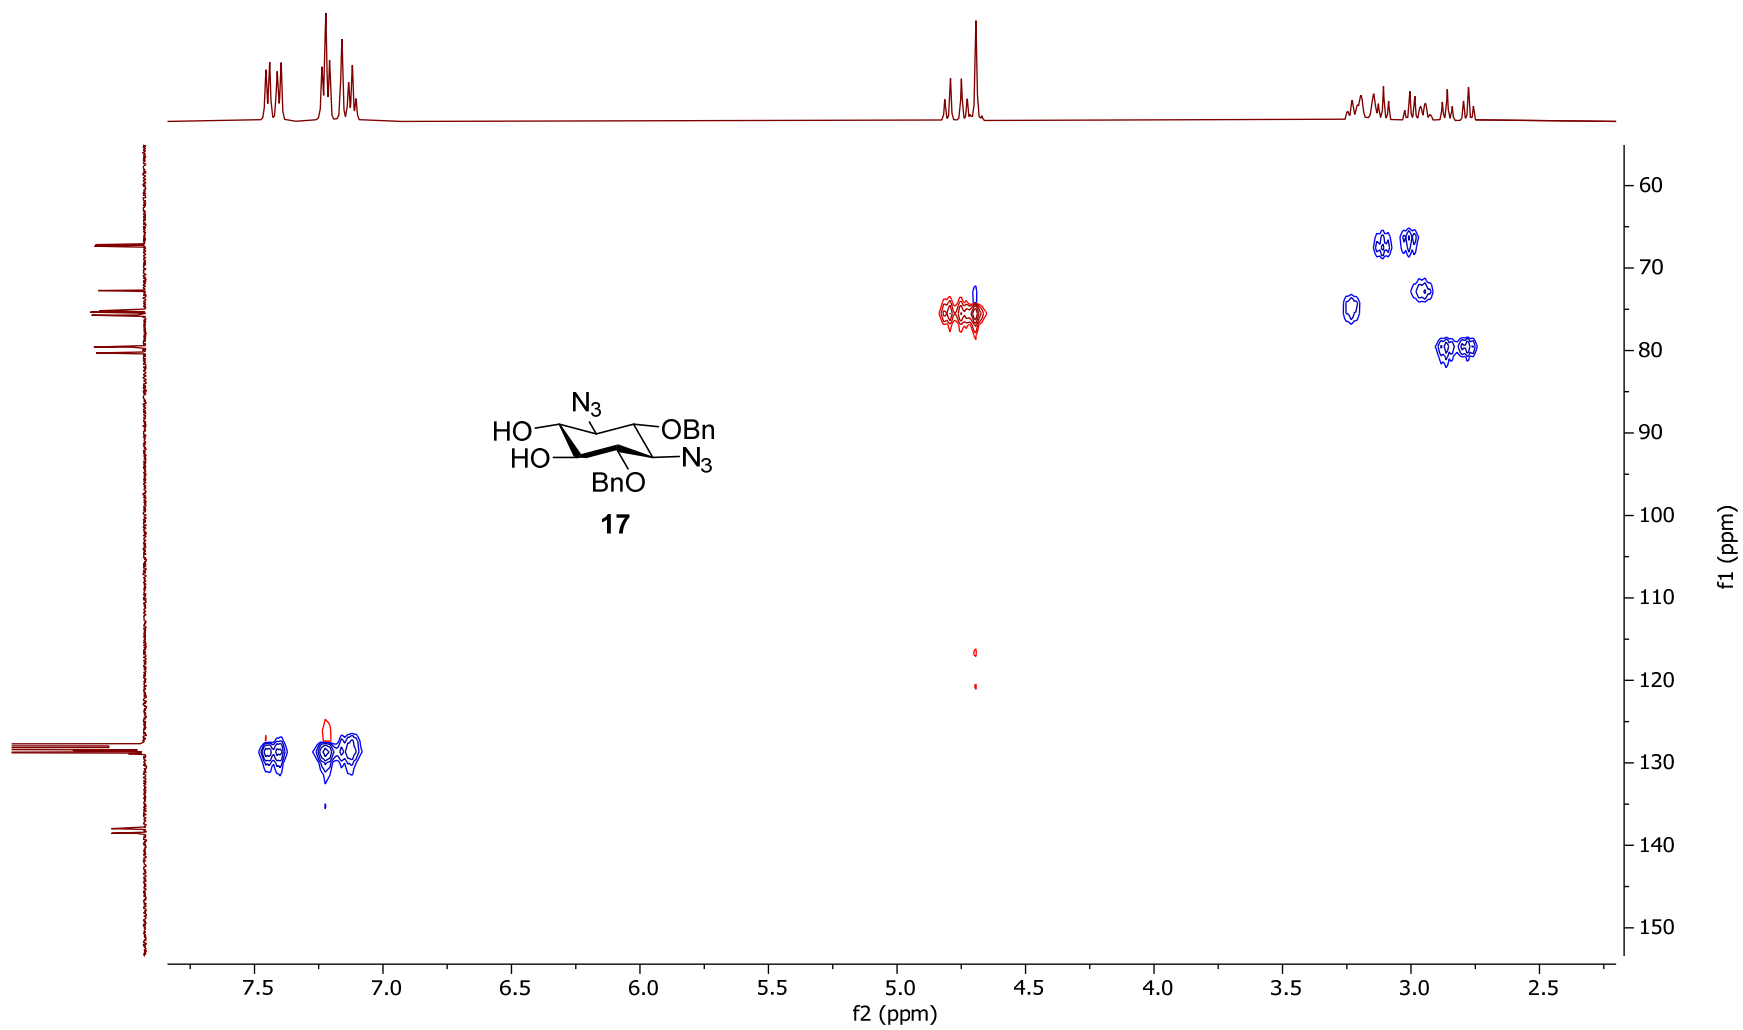

<sup>1</sup>H NMR Spectra (500 MHz, Benzene-d<sub>6</sub>) of 4,5-Di-O-acetyl-1,3-di(deamino)-1,3-diazido-2,6-di-O-benzylstreptamine (**18**)

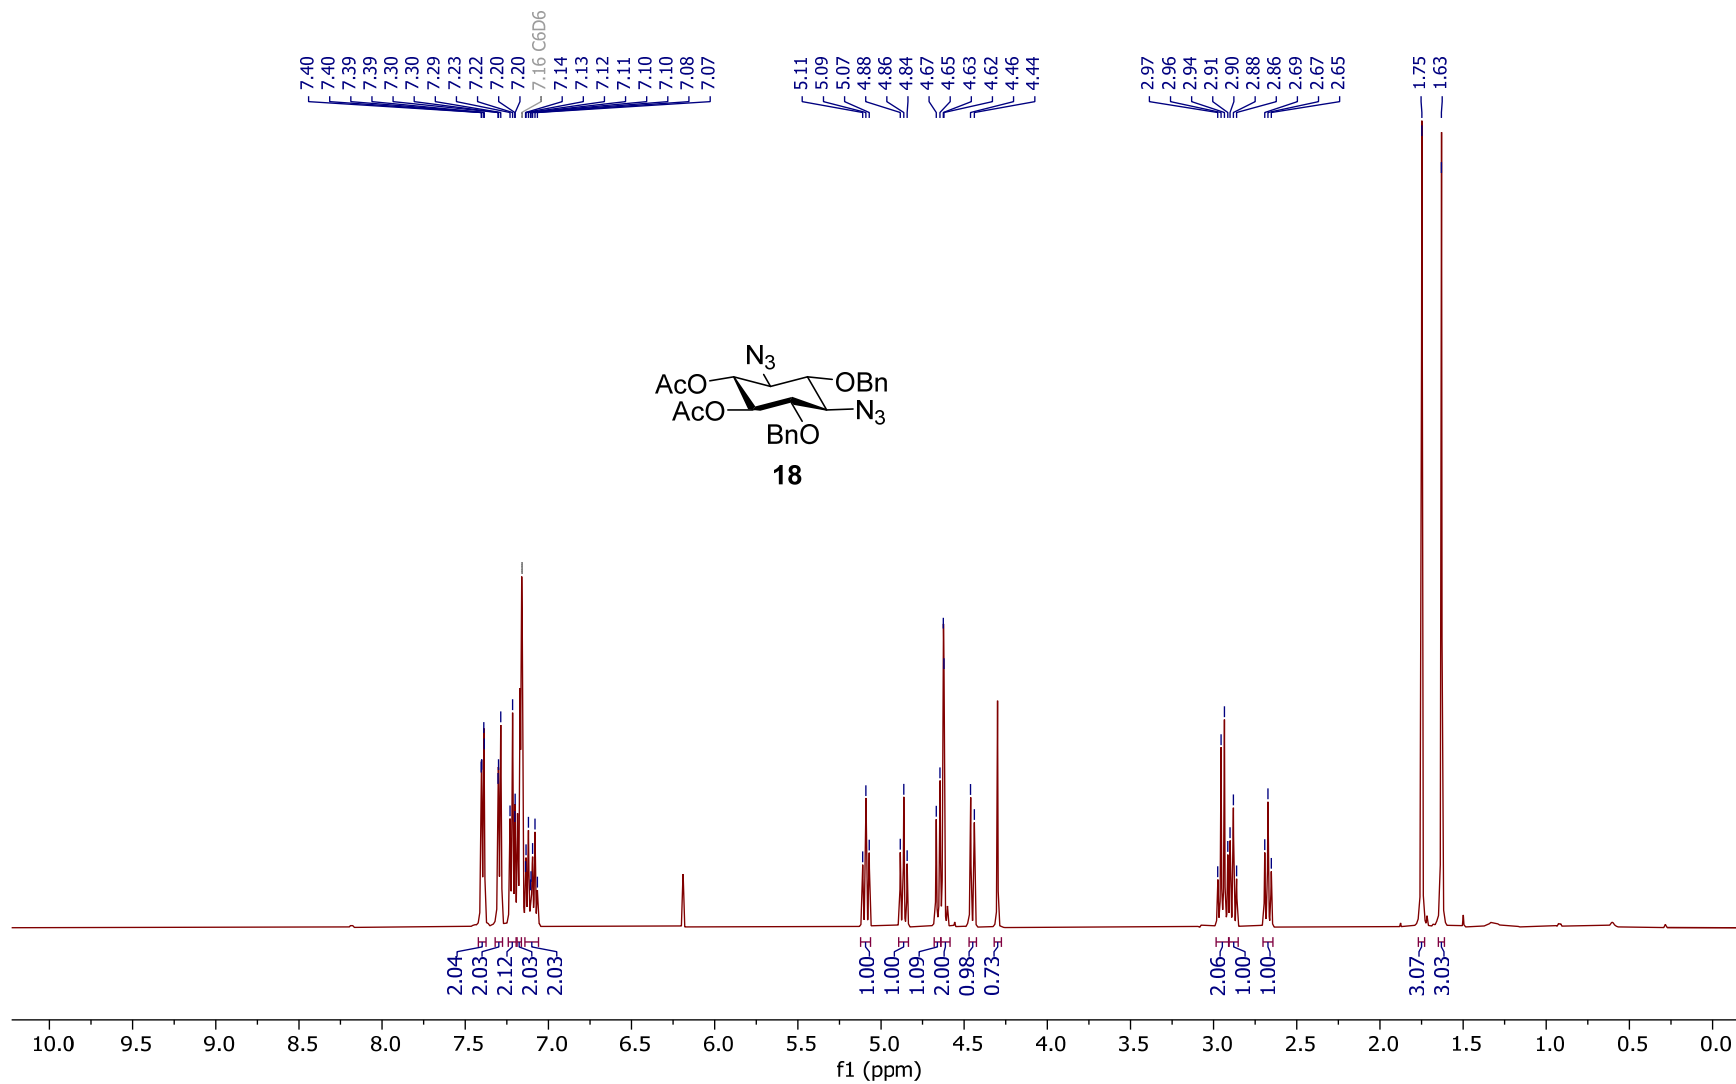



$^{13}\text{C}\{^1\text{H}\}$  NMR Spectra (126 MHz, Benzene- $d_6$ ) of 4,5-Di-O-acetyl-1,3-di(deamino)-1,3-diazido-2,6-di-O-benzylstreptamine (**18**)

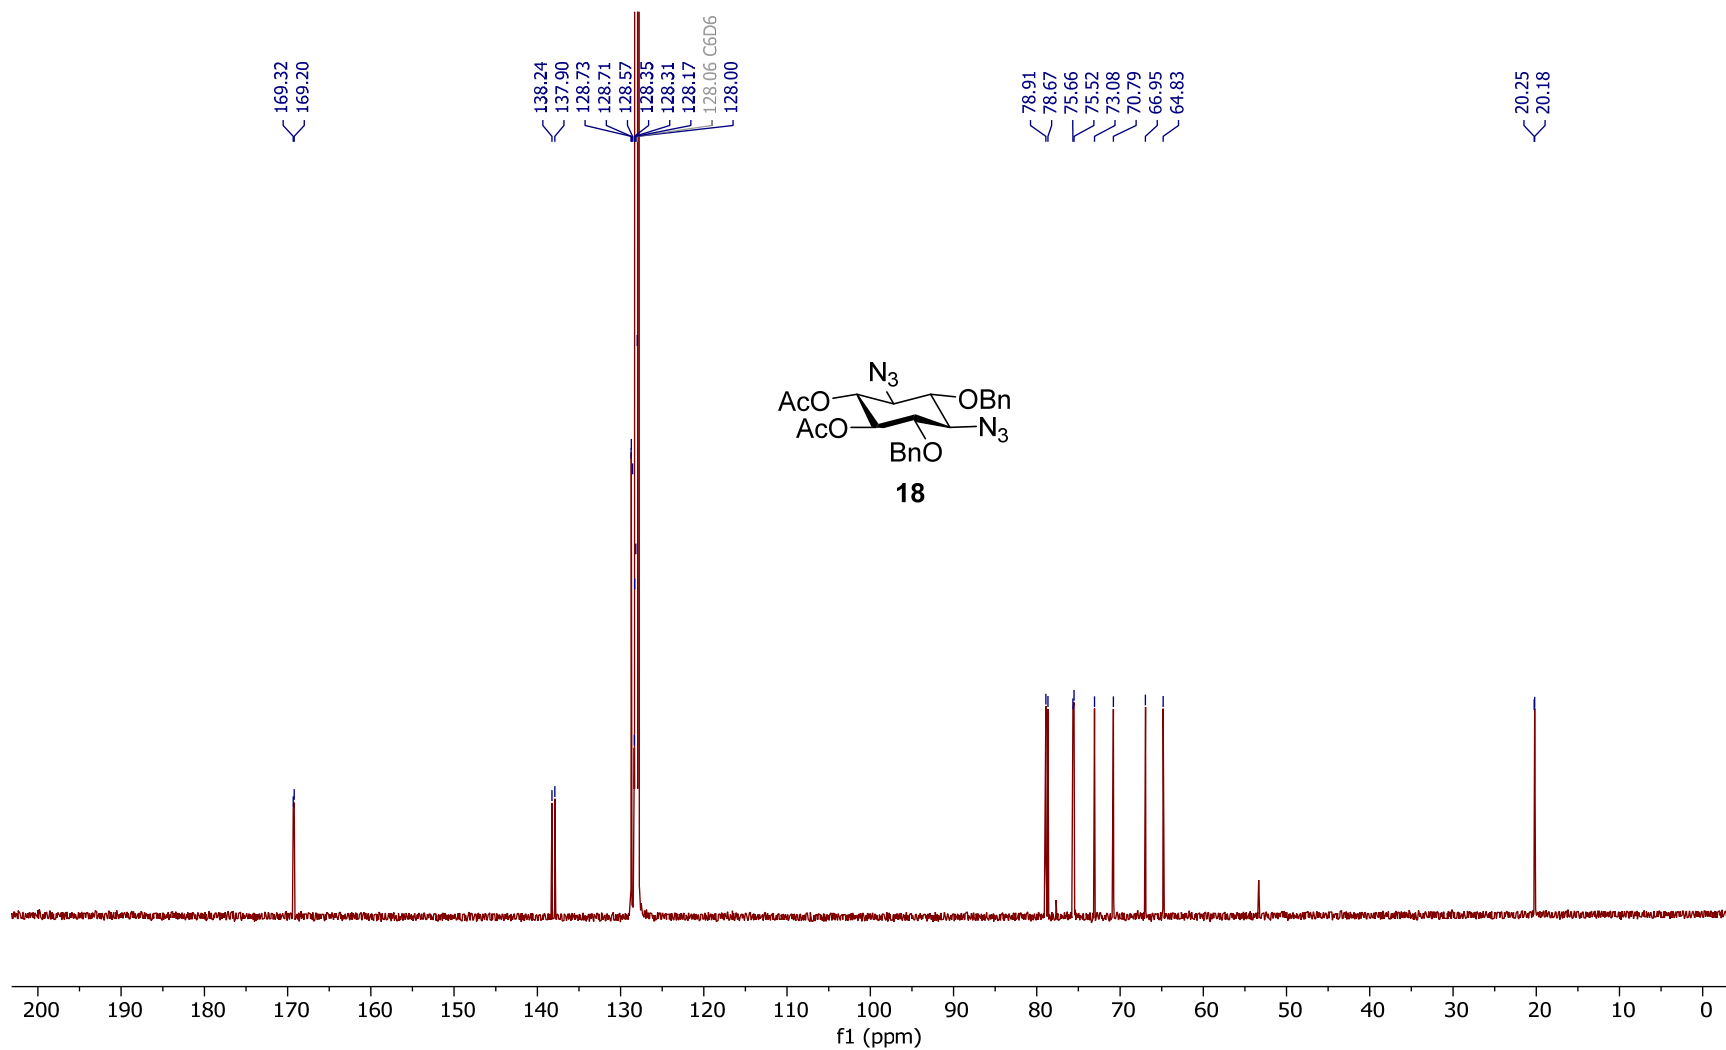

$^1\text{H}$ - $^1\text{H}$  COSY NMR Spectra (500 MHz, Benzene- $d_6$ ) of 4,5-Di-O-acetyl-1,3-di(deamino)-1,3-diazido-2,6-di-O-benzylstreptamine (**18**)

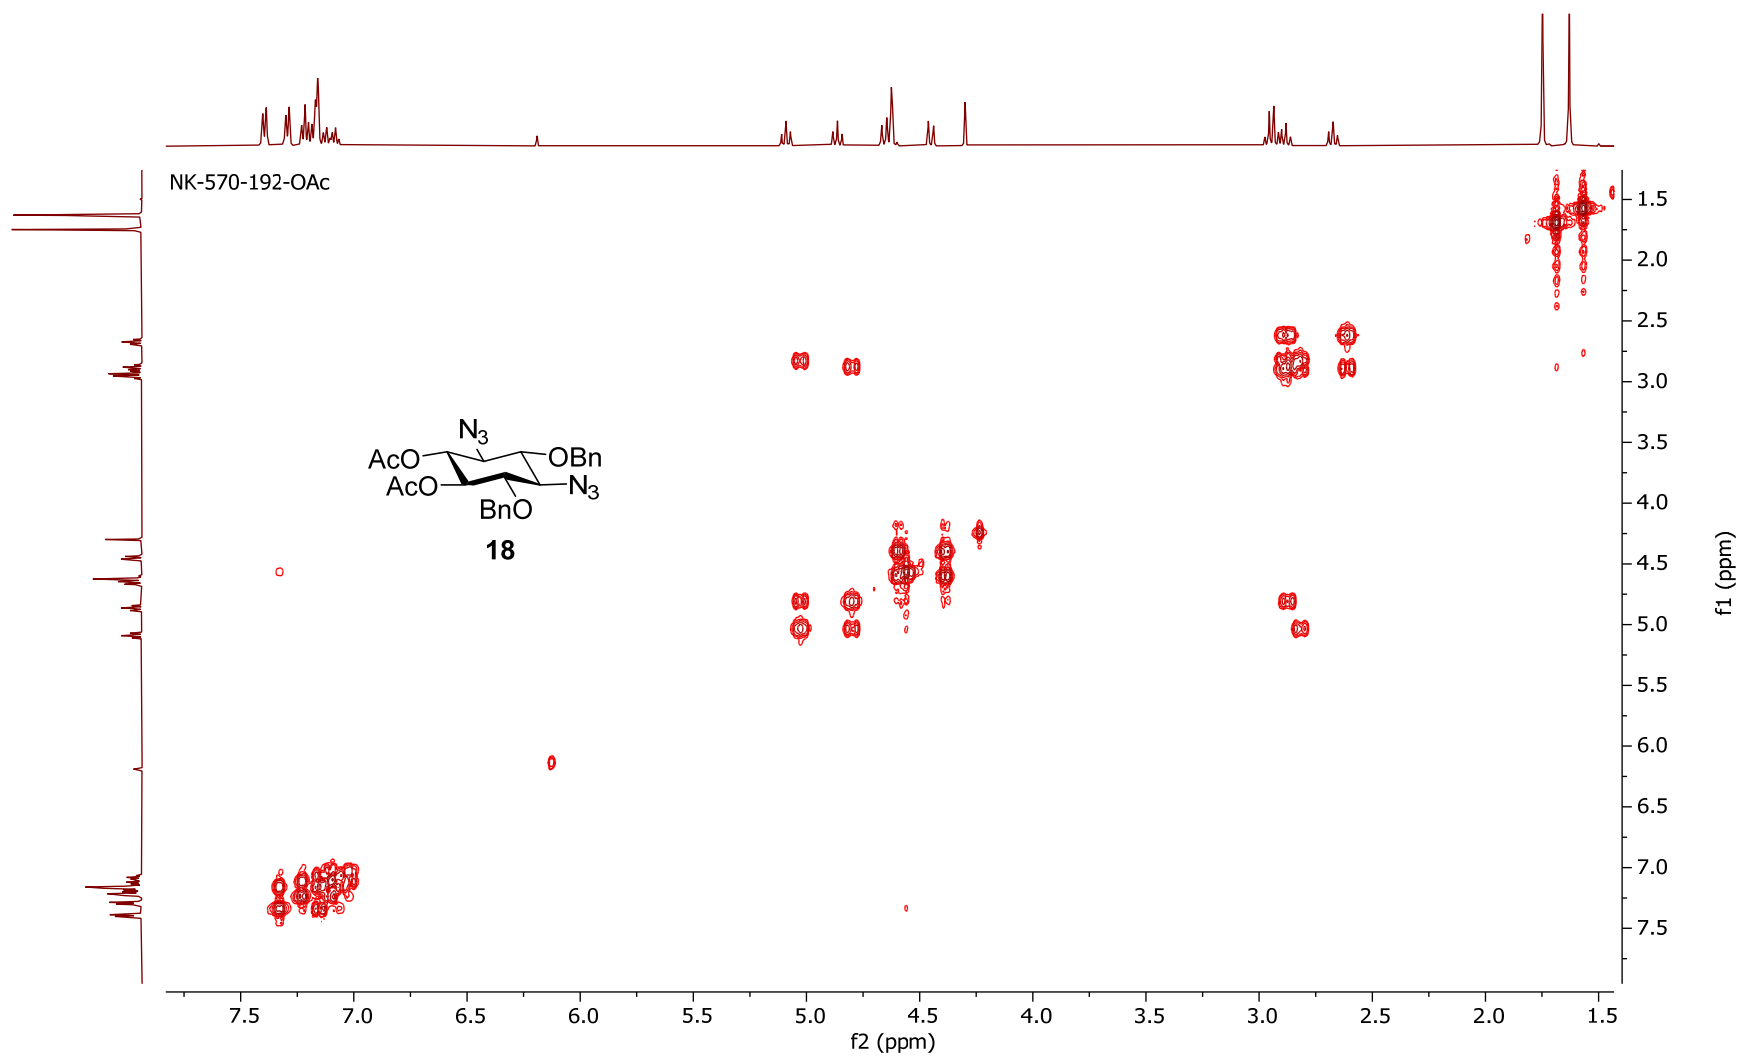

HSQC NMR Spectra (500 MHz, Benzene- $d_6$ ) of 4,5-Di-O-acetyl-1,3-di(deamino)-1,3-diazido-2,6-di-O-benzylstreptamine (**18**)

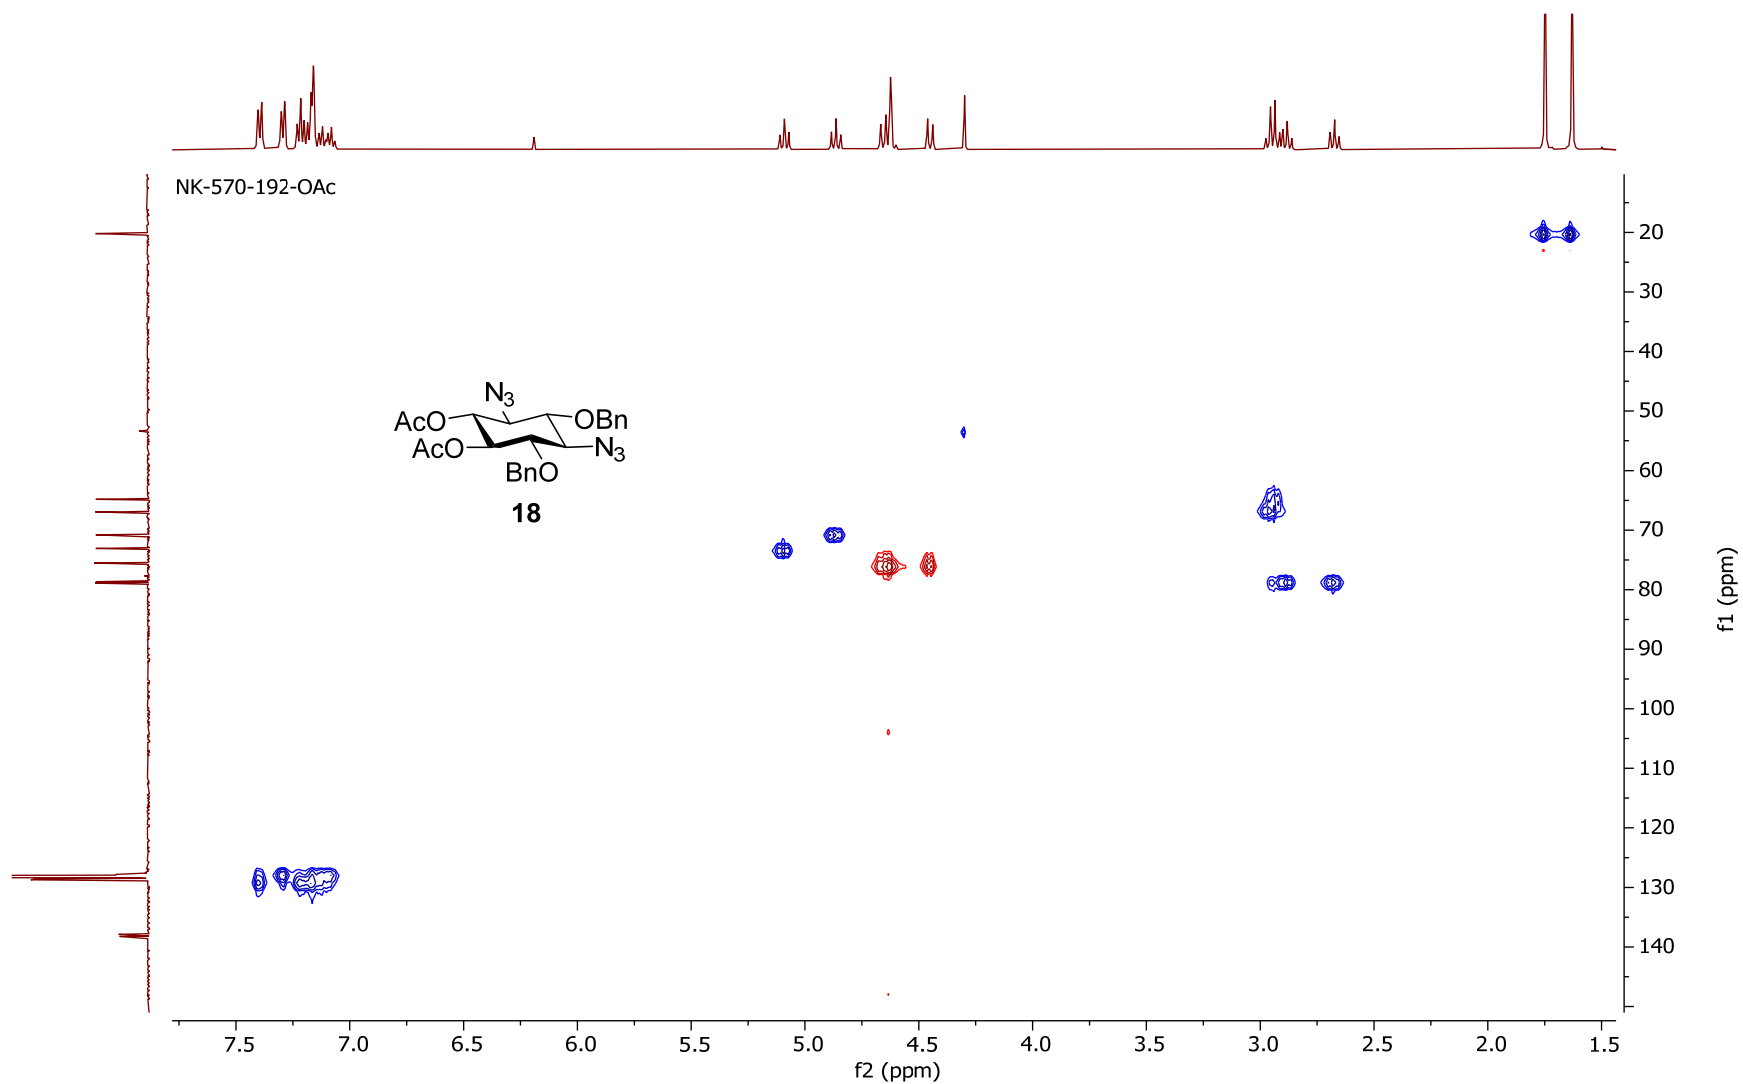

<sup>1</sup>H NMR Spectra (500 MHz, CDCl<sub>3</sub>) of 1,3-Di(deamino)-1,3-diazo-5,6-di-O-benzylstreptamine (**19**)

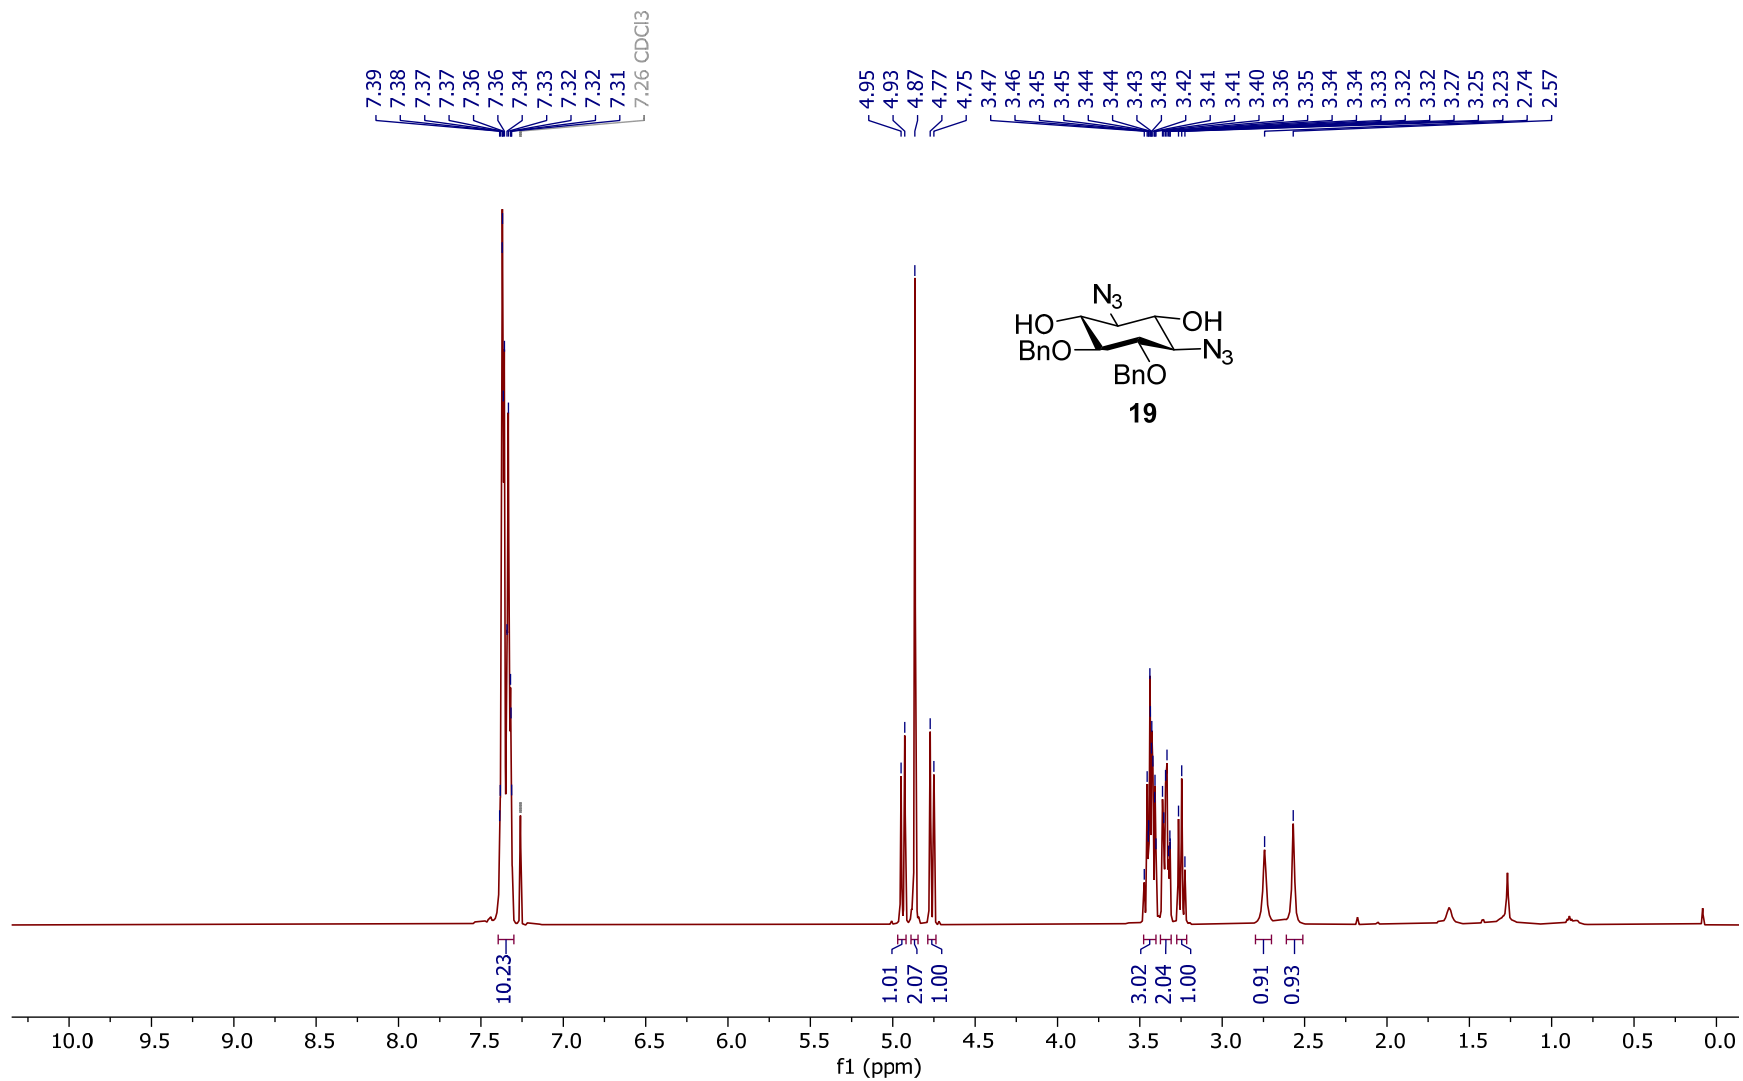

$^{13}\text{C}\{^1\text{H}\}$  NMR Spectra (126 MHz,  $\text{CDCl}_3$ ) of 1,3-Di(deamino)-1,3-diazo-5,6-di-O-benzylstreptamine (**19**)

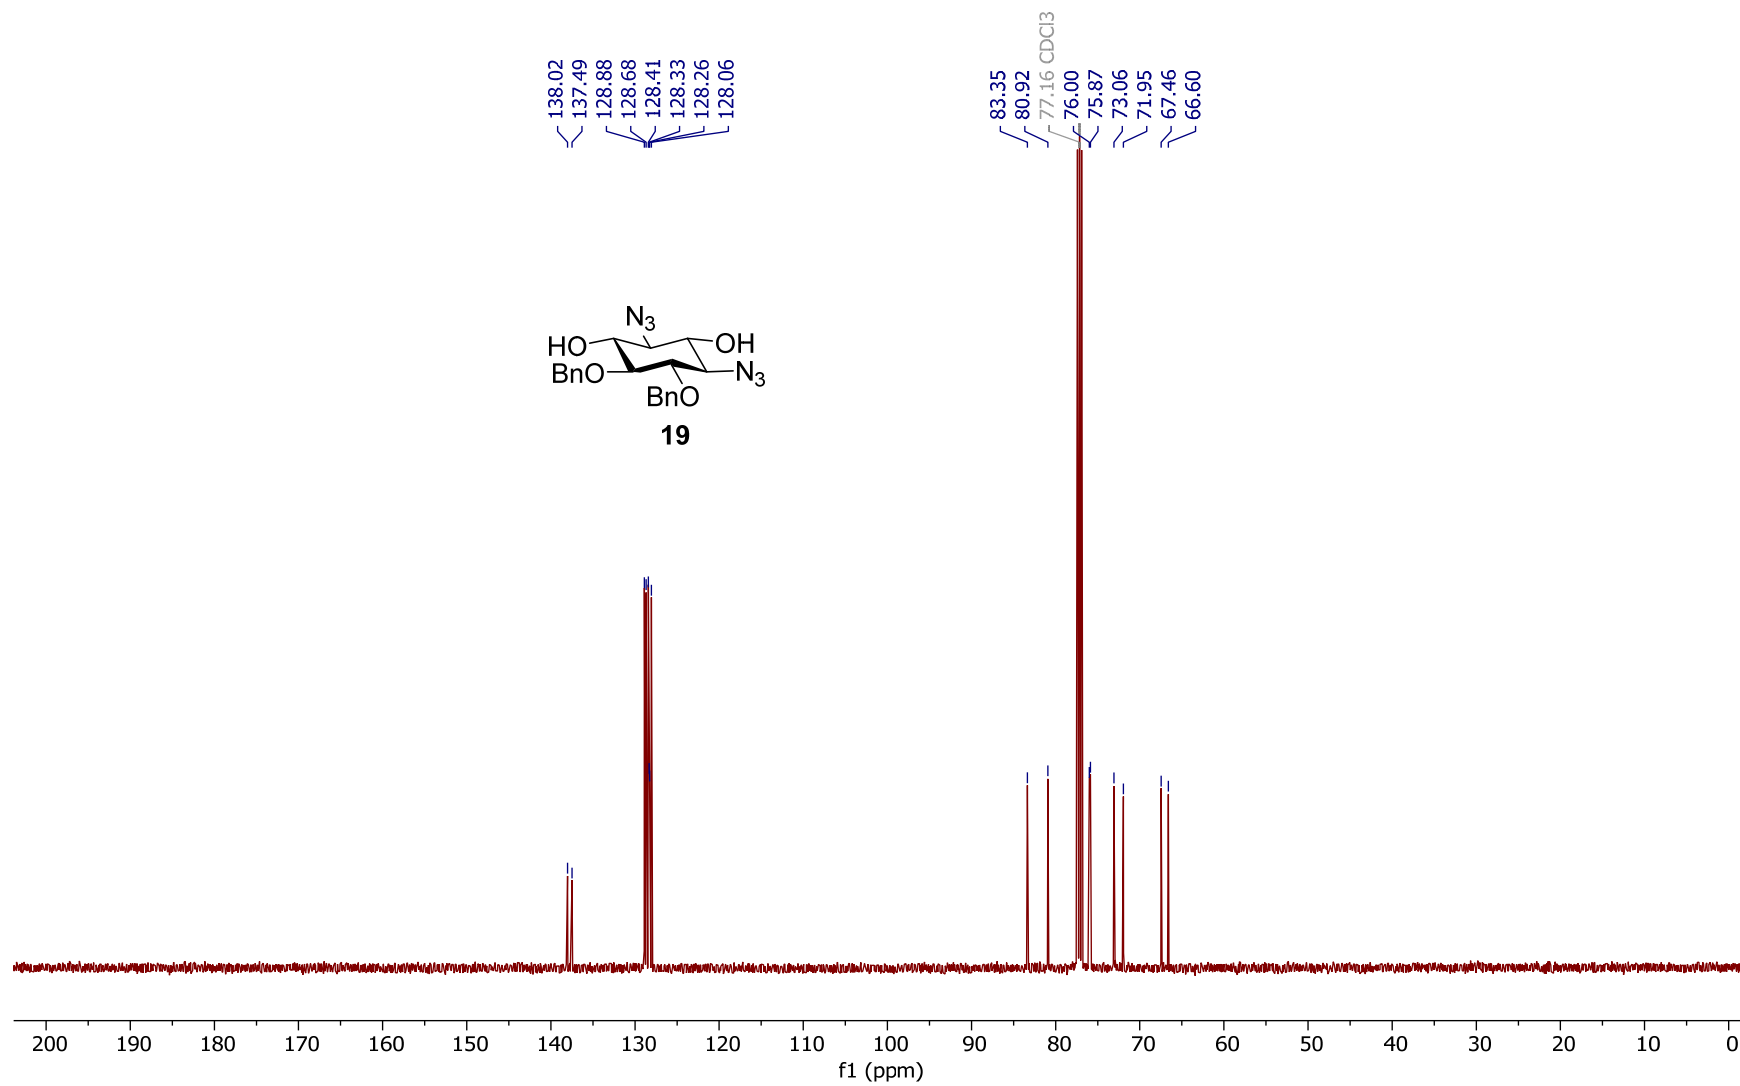

$^1\text{H}$ - $^1\text{H}$  COSY NMR Spectra (500 MHz,  $\text{CDCl}_3$ ) of 1,3-Di(deamino)-1,3-diazido-5,6-di-O-benzylstreptamine (**19**)

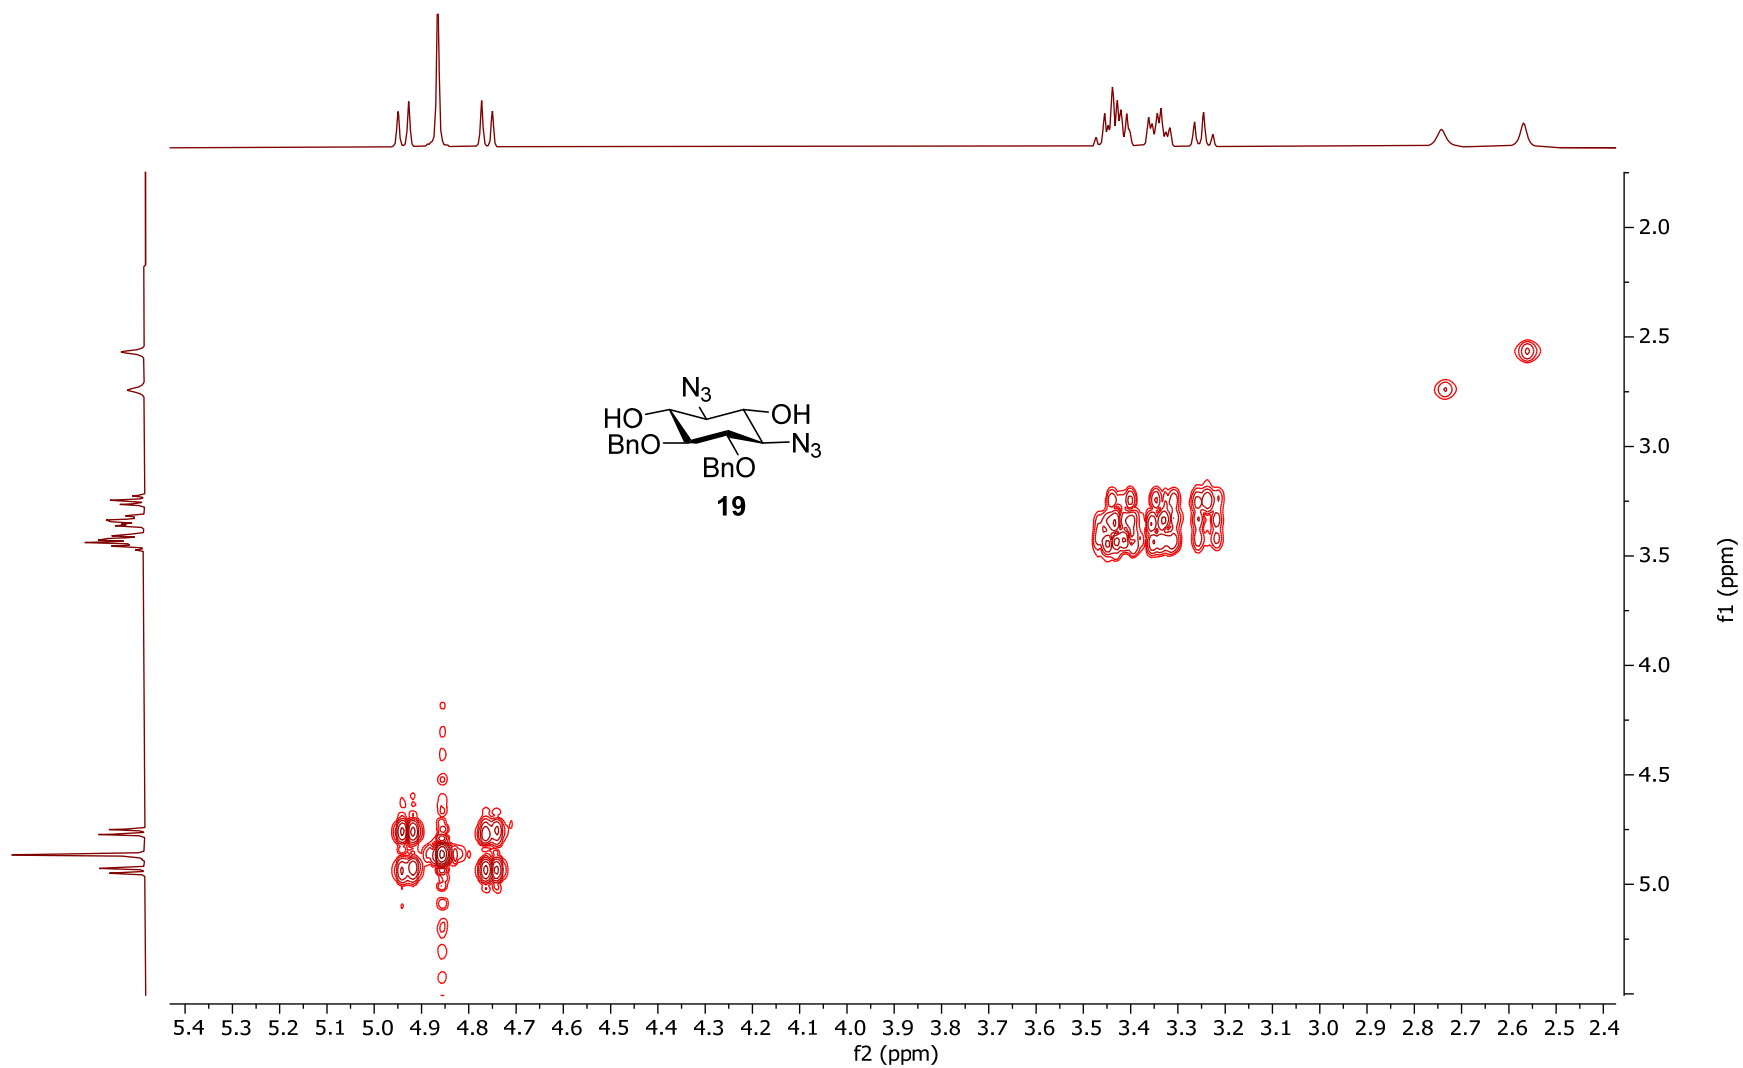

HSQC NMR Spectra (500 MHz, CDCl<sub>3</sub>) of 1,3-Di(deamino)-1,3-diazido-5,6-di-O-benzylstreptamine (**19**)

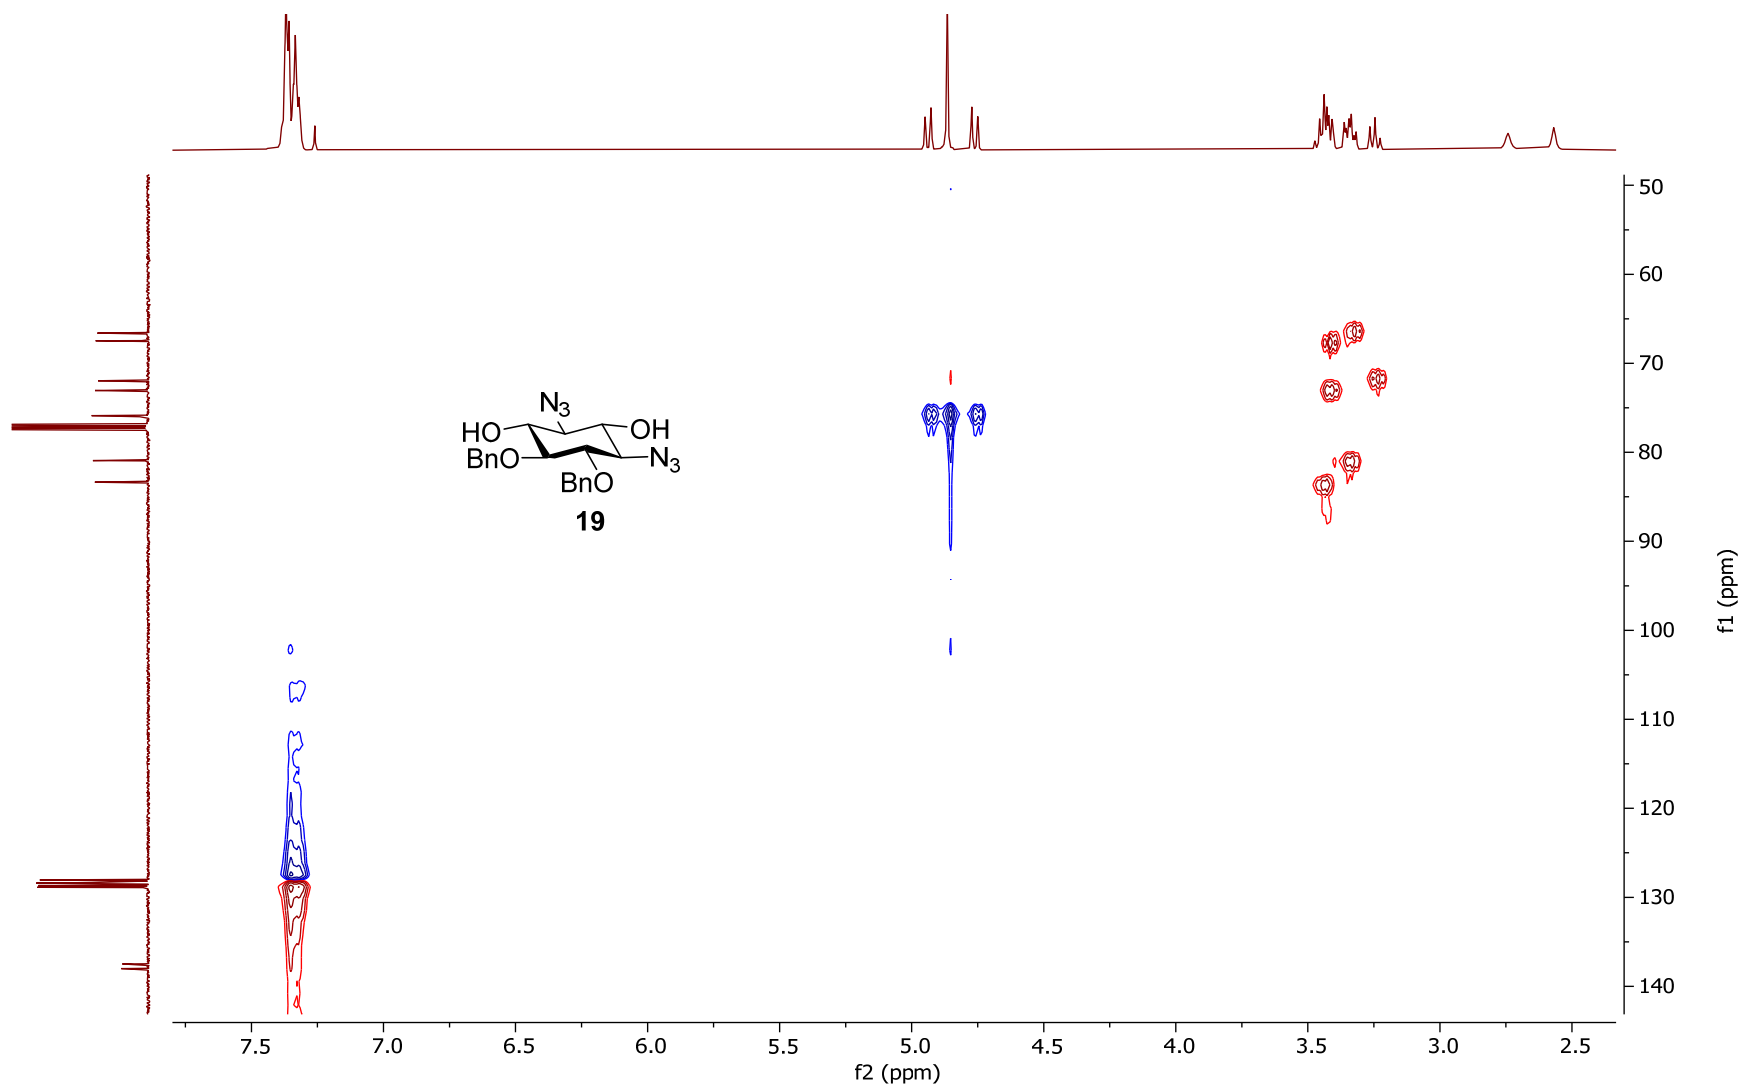

<sup>1</sup>H NMR Spectra (500 MHz, Benzene-d<sub>6</sub>) of 1,3-Di(deamino)-1,3-diazido-2,5-di-O-benzylstreptamine (**20**)

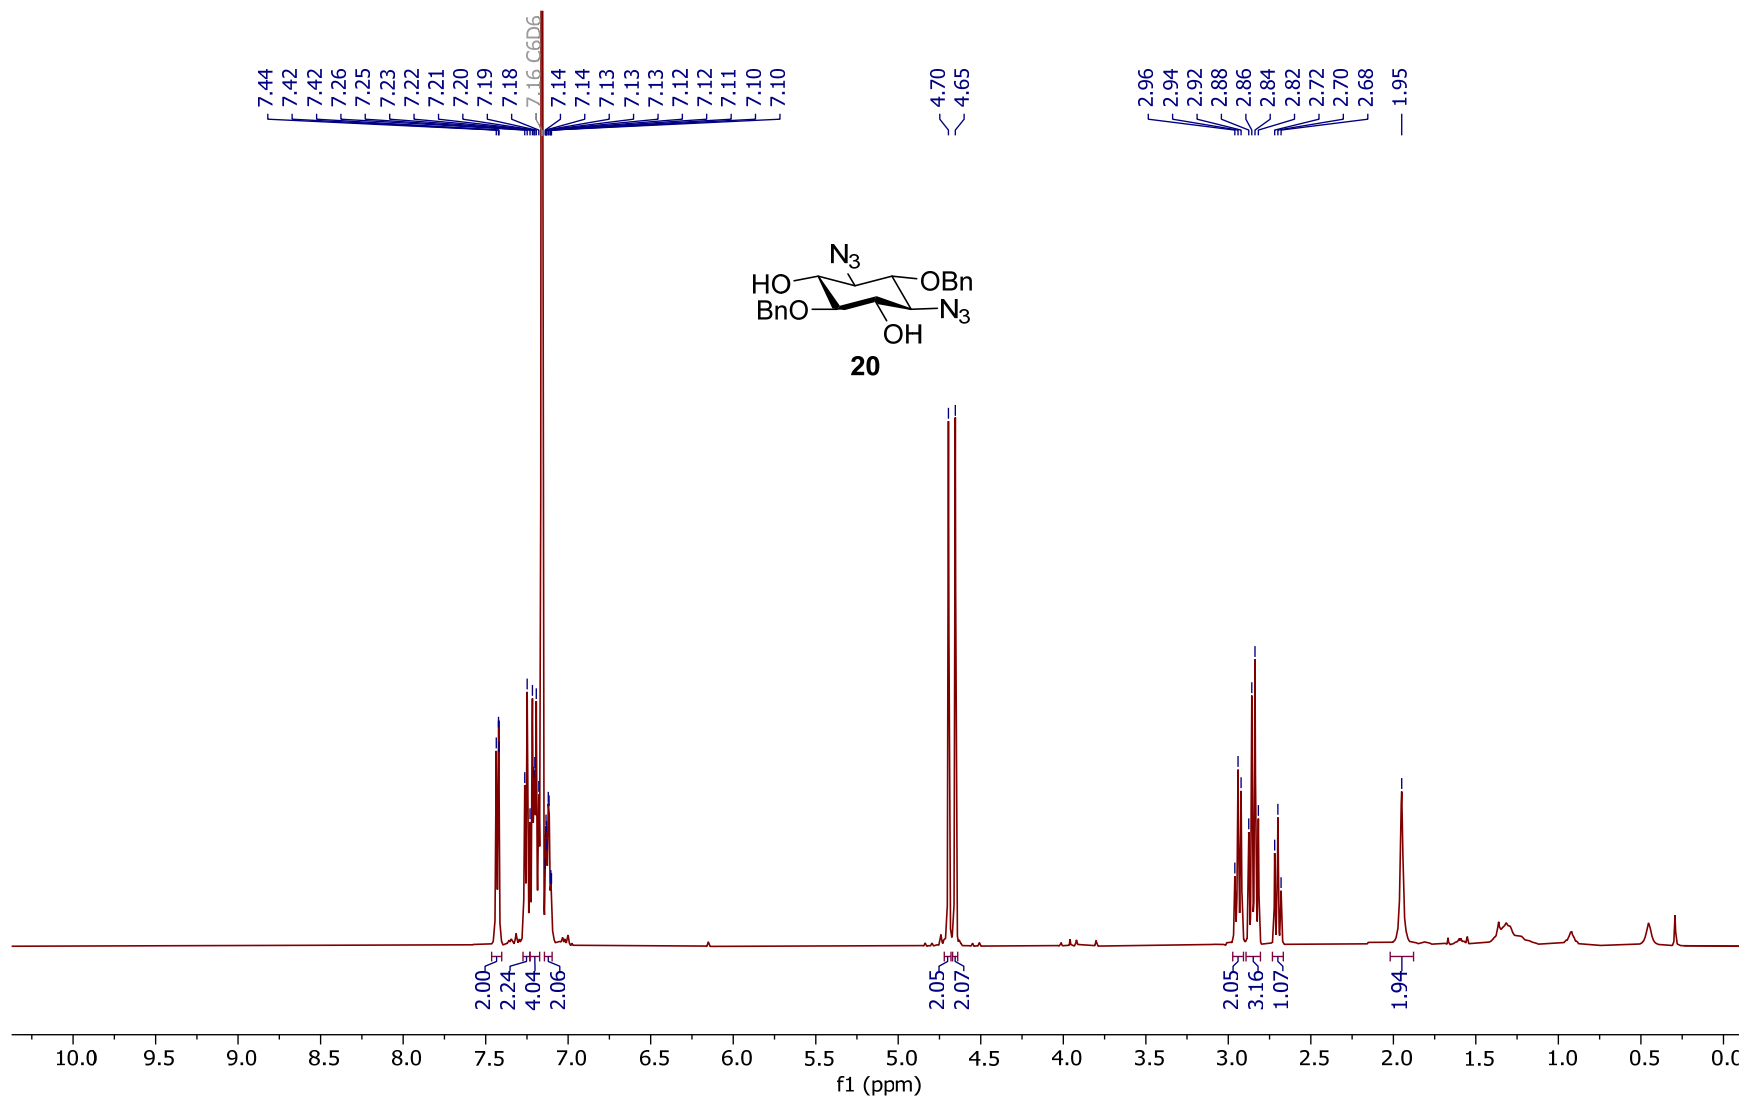



$^{13}\text{C}\{^1\text{H}\}$  NMR Spectra (126 MHz, Benzene- $d_6$ ) of 1,3-Di(deamino)-1,3-diazo-2,5-di-O-benzylstreptamine (**20**)

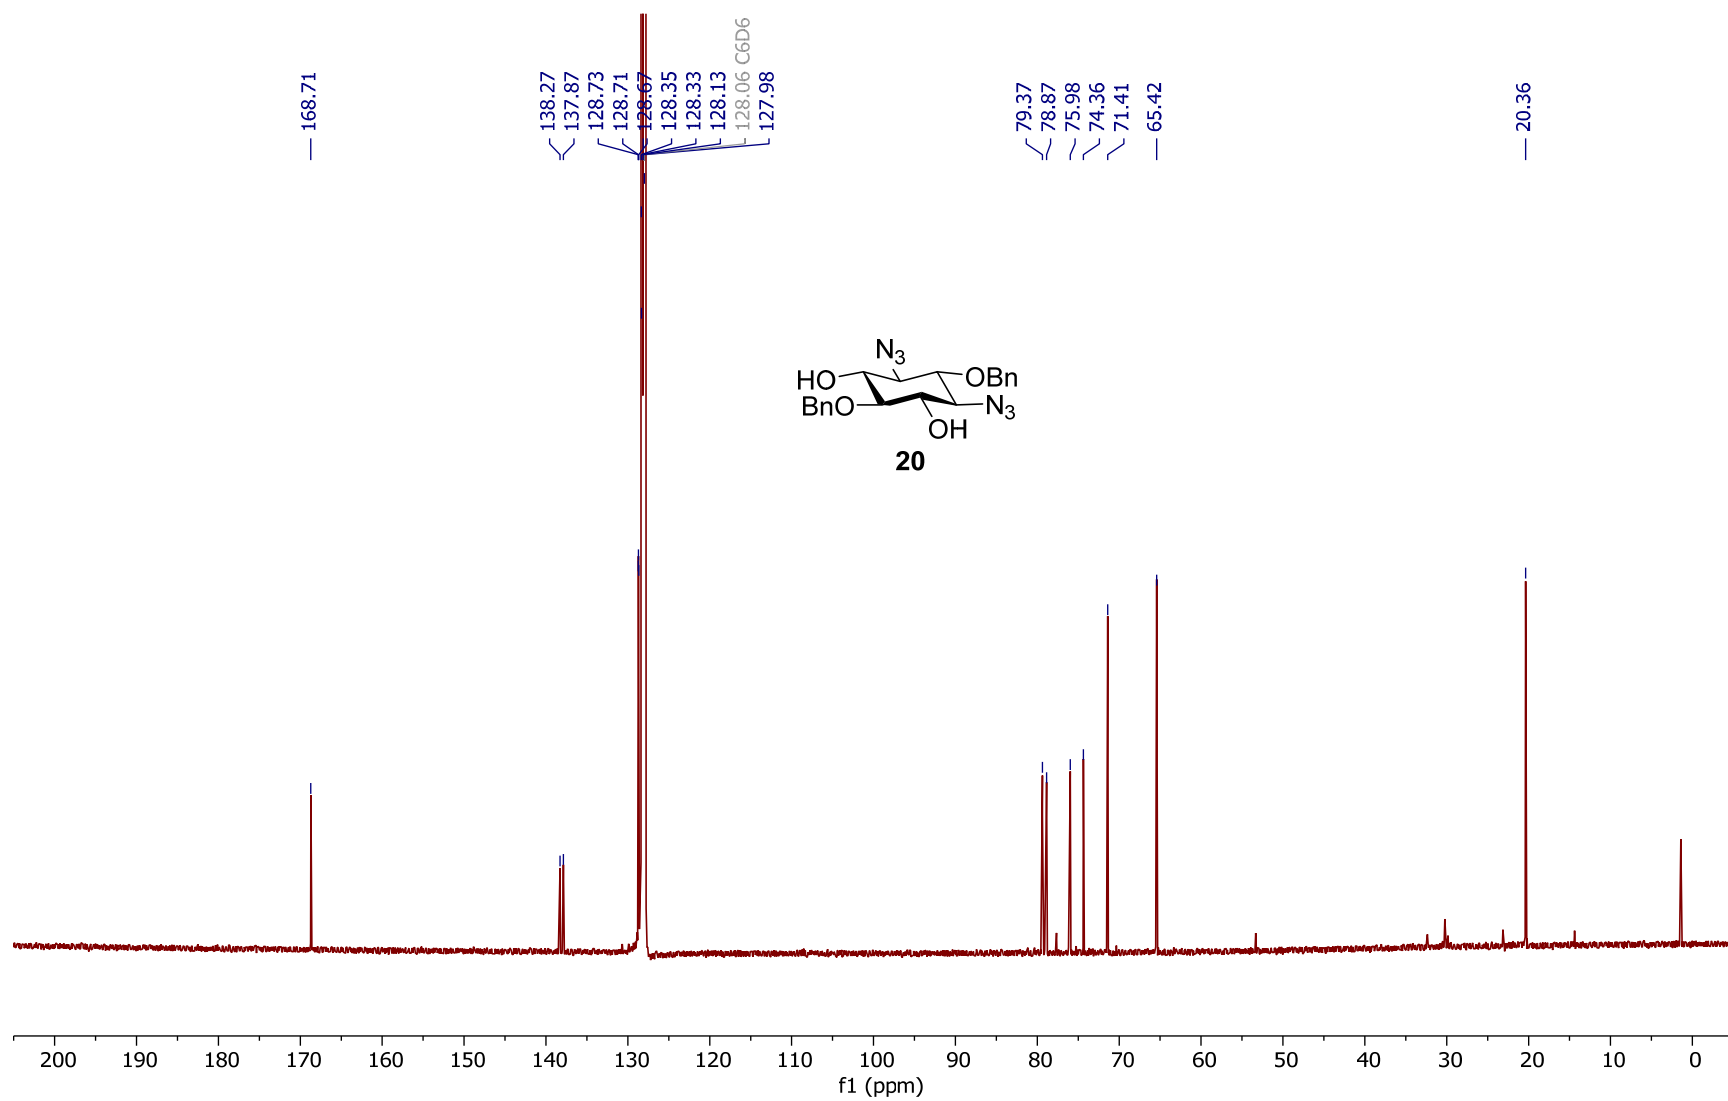

$^1\text{H}$ - $^1\text{H}$  COSY NMR Spectra (500 MHz, Benzene- $d_6$ ) of 1,3-Di(deamino)-1,3-diazido-2,5-di-O-benzylstreptamine (**20**)

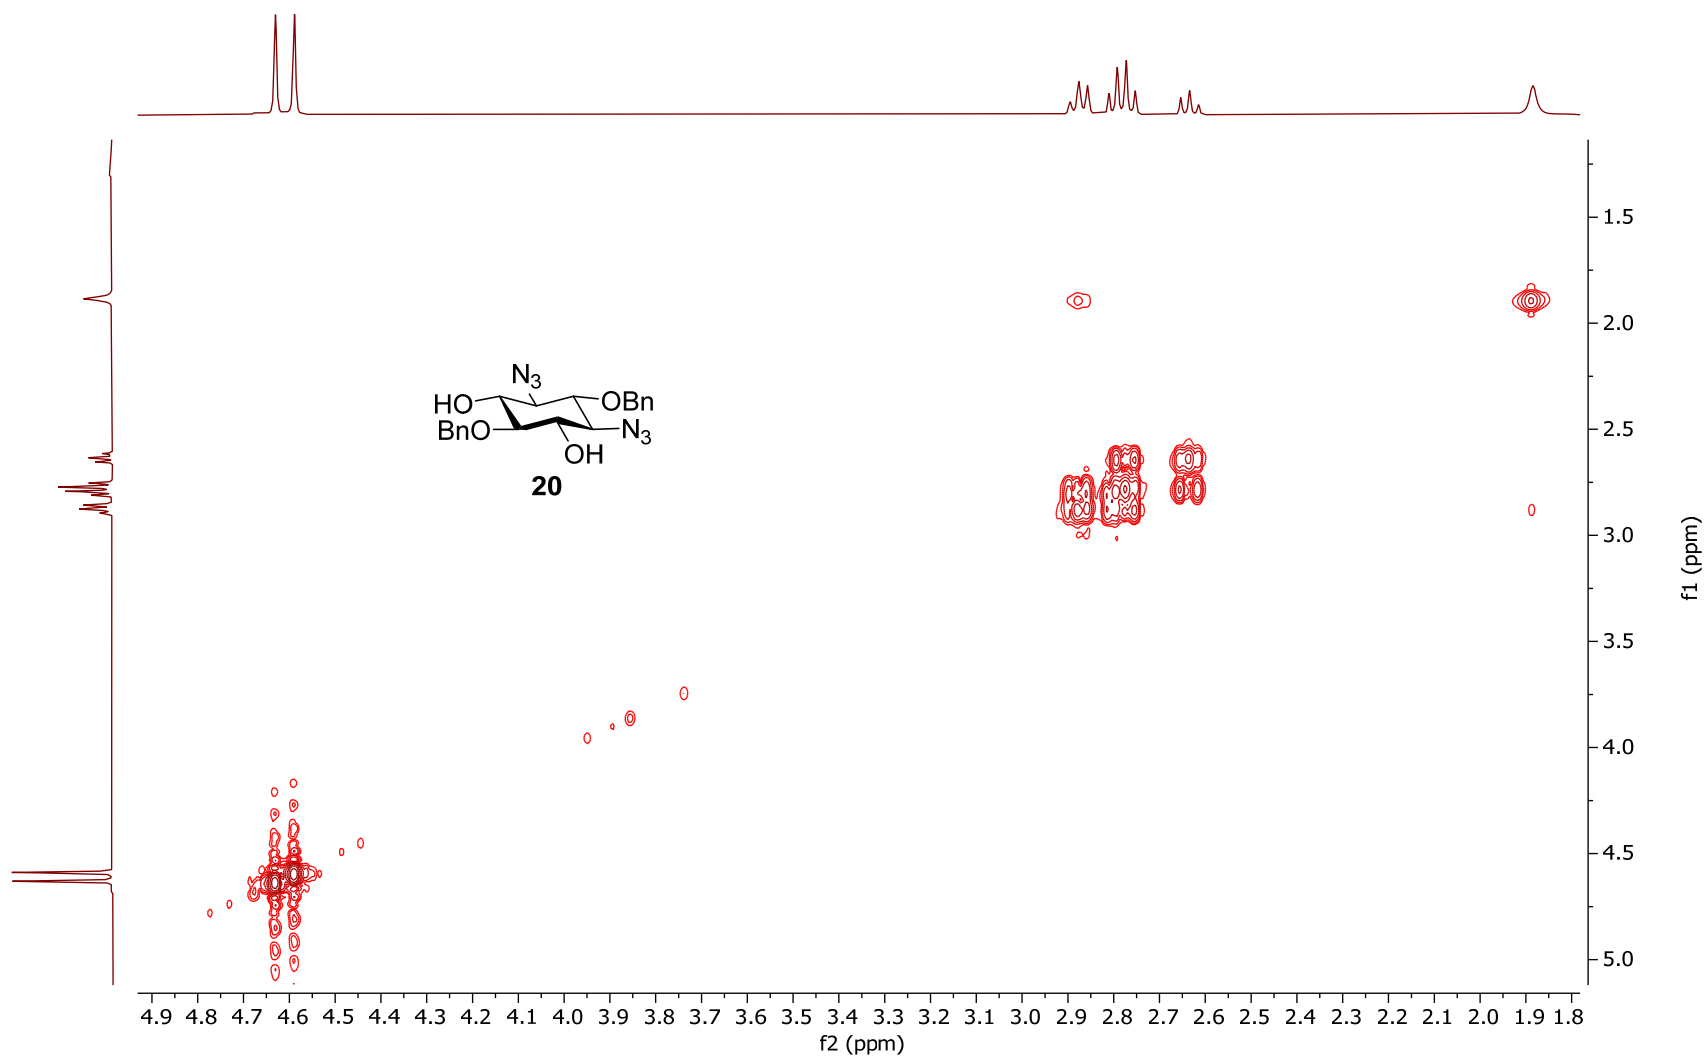

HSQC NMR Spectra (500 MHz, Benzene- $d_6$ ) of 1,3-Di(deamino)-1,3-diazido-2,5-di-O-benzylstreptamine (**20**)

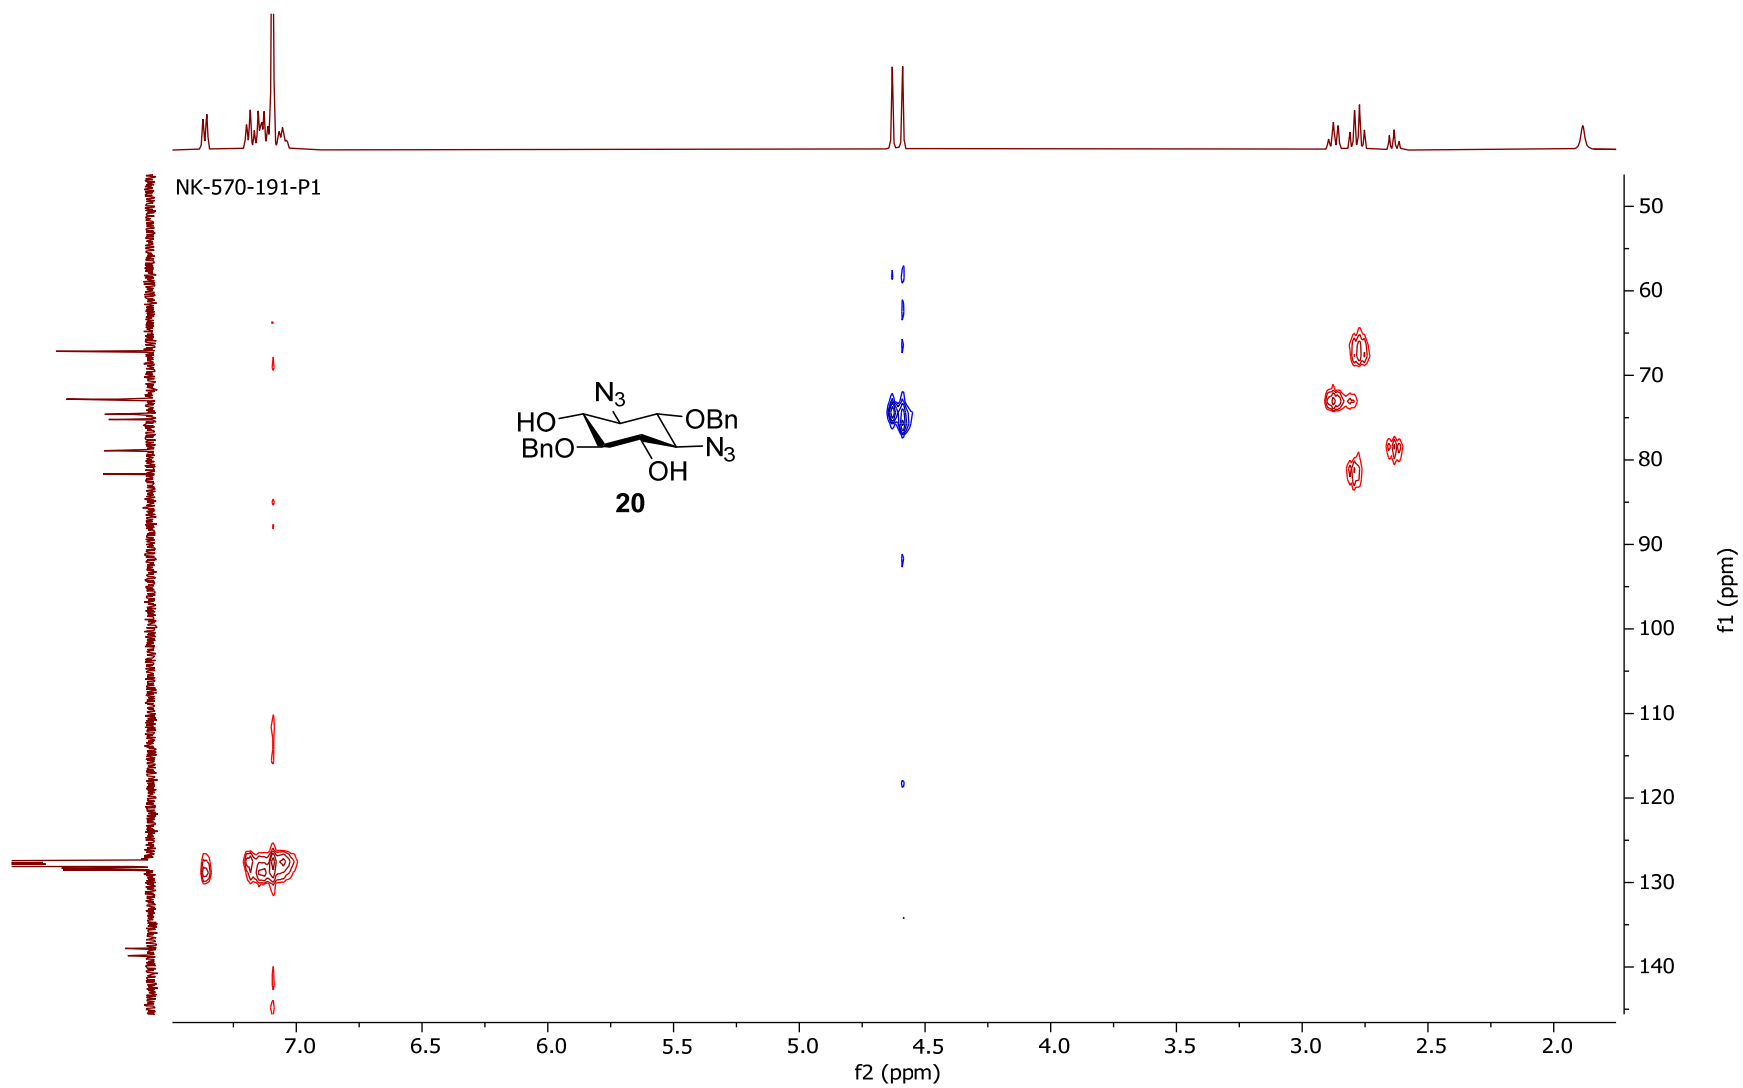

<sup>1</sup>H NMR Spectra (500 MHz, Benzene-d<sub>6</sub>) of 2,4-Di-O-acetyl-1,3-di(deamino)-1,3-diazido-5,6-di-O-benzylstreptamine (**21**)

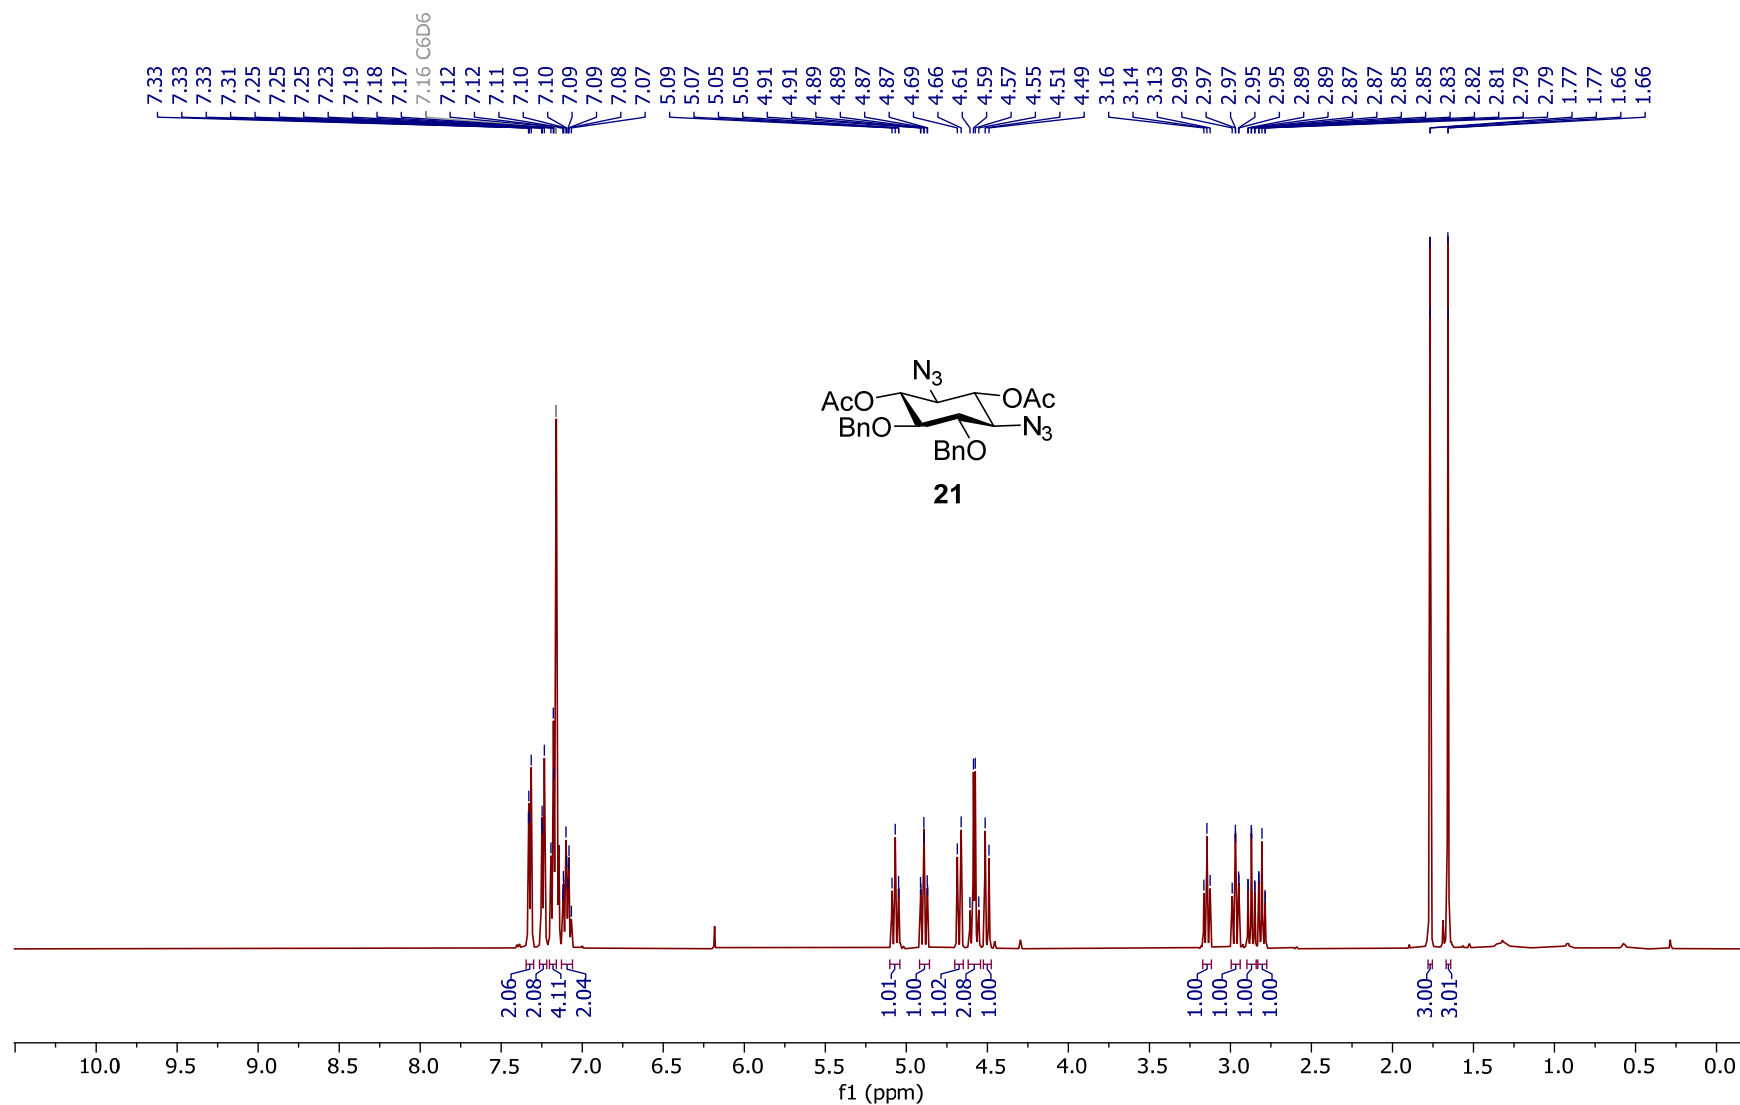

$^{13}\text{C}\{^1\text{H}\}$  NMR Spectra (126 MHz, Benzene- $d_6$ ) of 2,4-Di-O-acetyl-1,3-di(deamino)-1,3-diazido-5,6-di-O-benzylstreptamine (**21**)

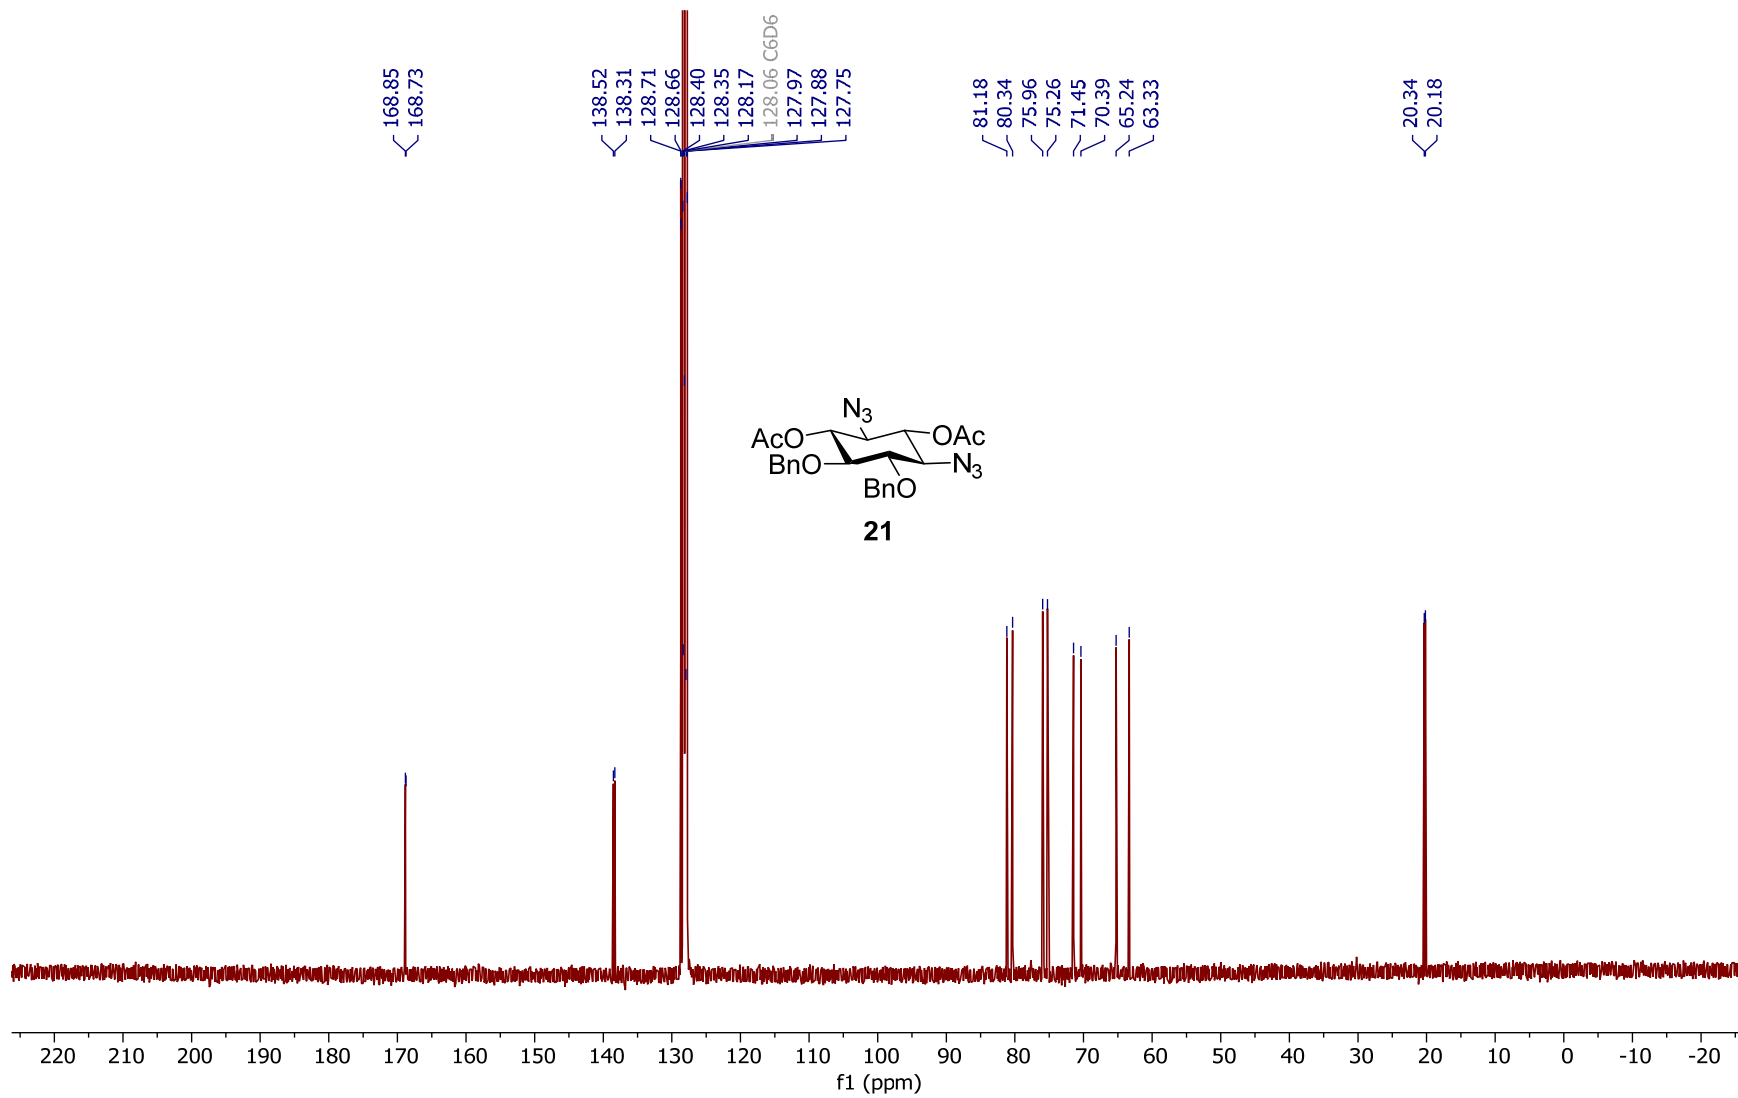

$^1\text{H}$ - $^1\text{H}$  COSY NMR Spectra (500 MHz, Benzene- $d_6$ ) of 2,4-Di-O-acetyl-1,3-di(deamino)-1,3-diazido-5,6-di-O-benzylstreptamine (**21**)

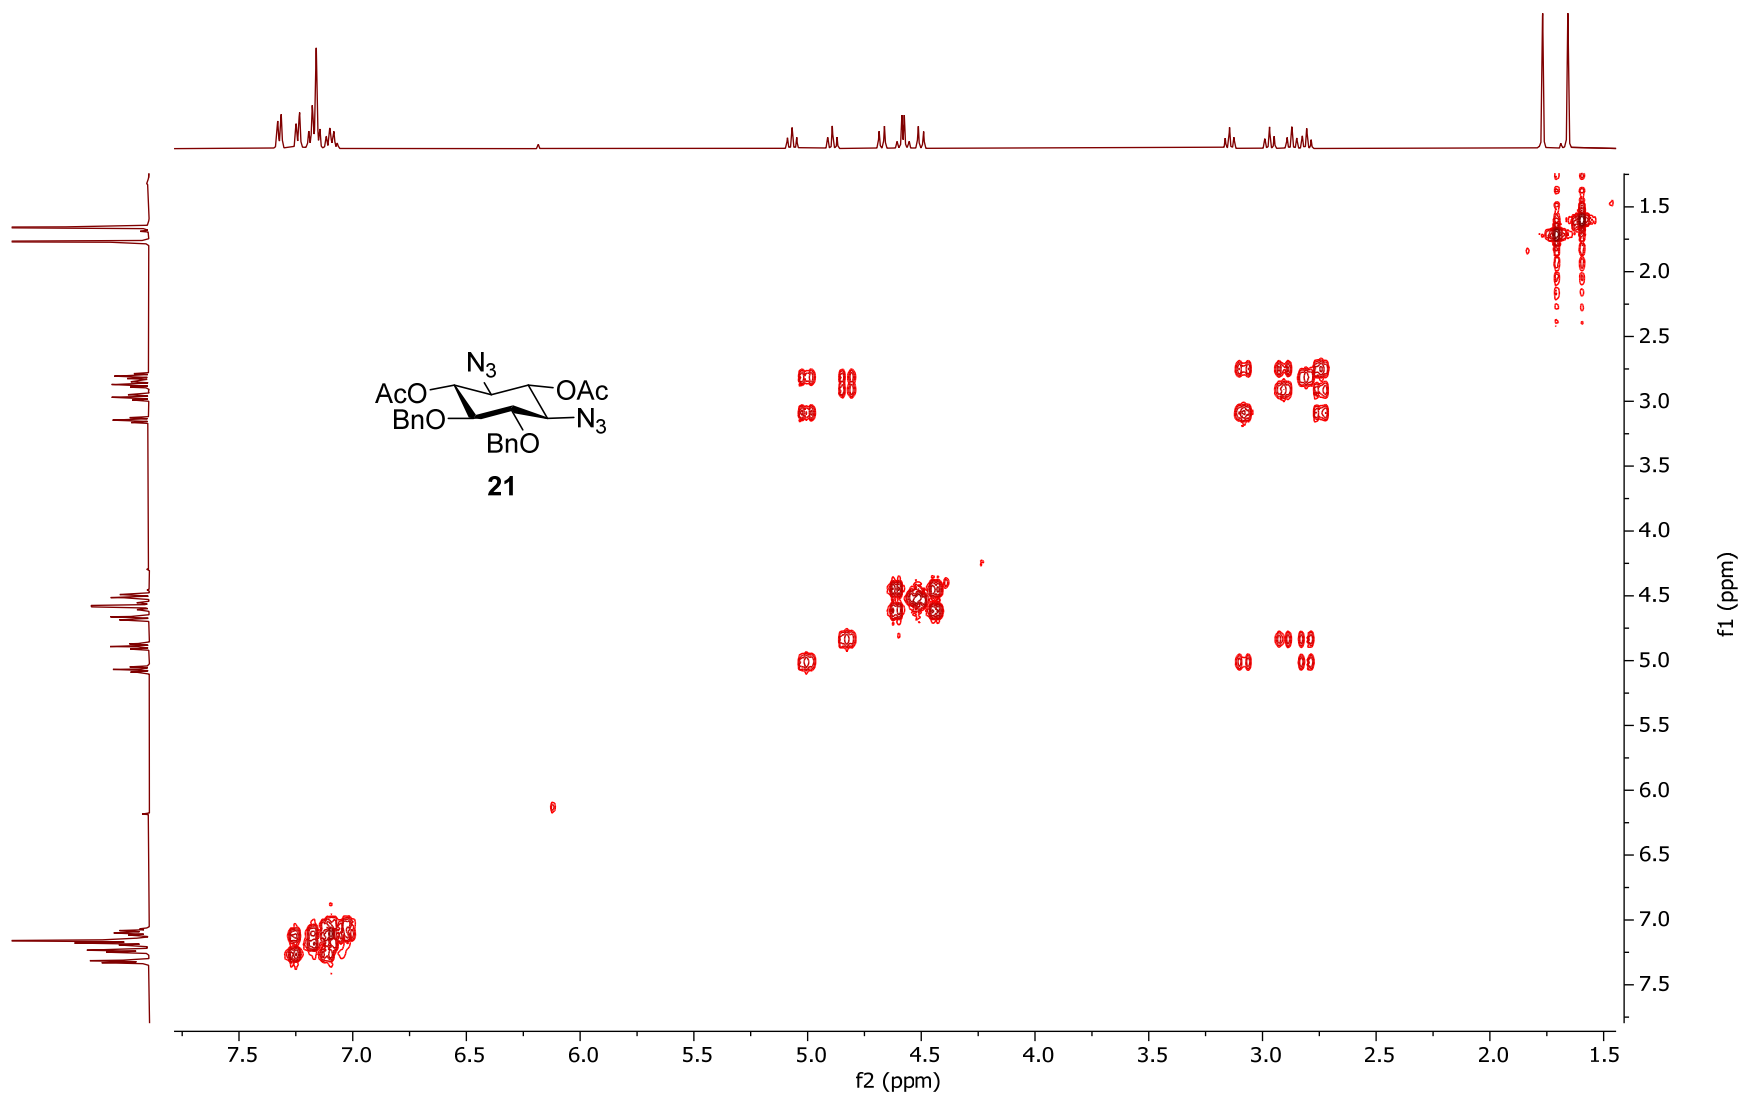

HSQC NMR Spectra (500 MHz, Benzene-*d*<sub>6</sub>) of 2,4-Di-O-acetyl-1,3-di(deamino)-1,3-diazido-5,6-di-O-benzylstreptamine (**21**)

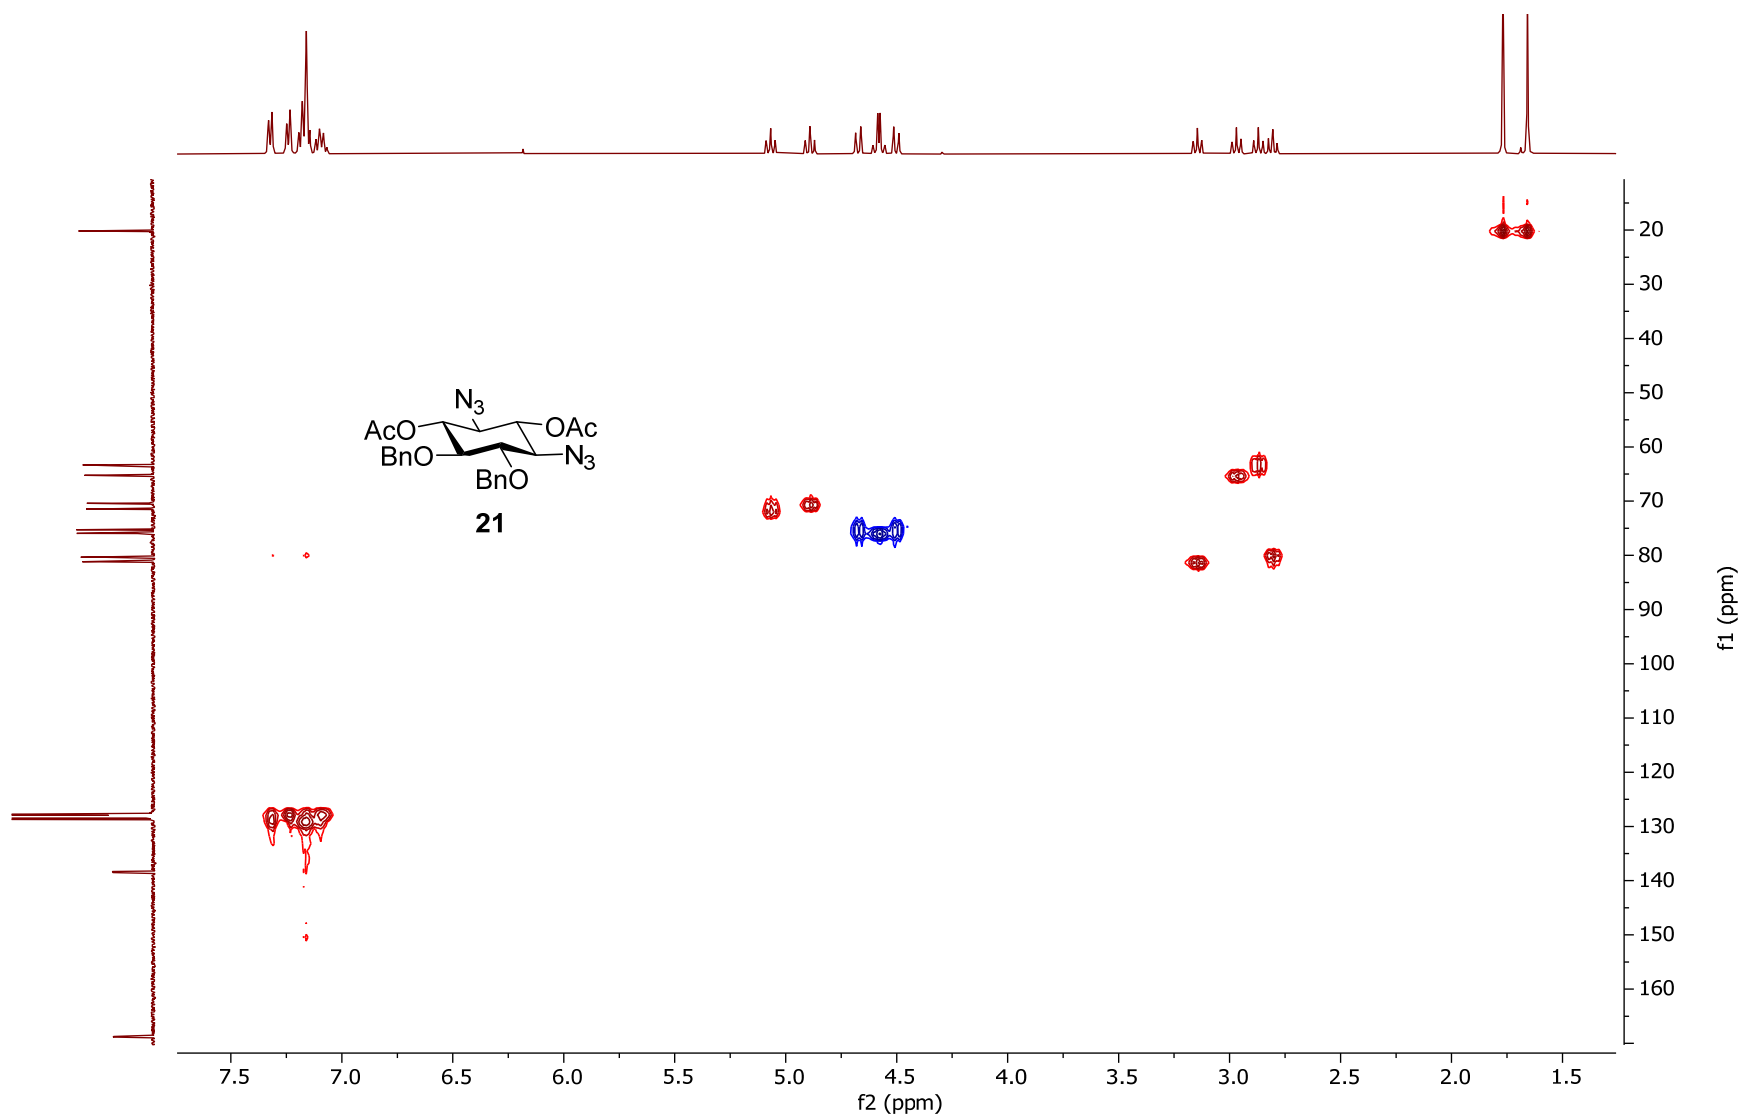

$^1\text{H}$  NMR Spectra (500 MHz, Benzene- $d_6$ ) of 4,6-Di-O-acetyl-1,3-di(deamino)-1,3-diazido-2,5-di-O-benzylstreptamine (**22**)

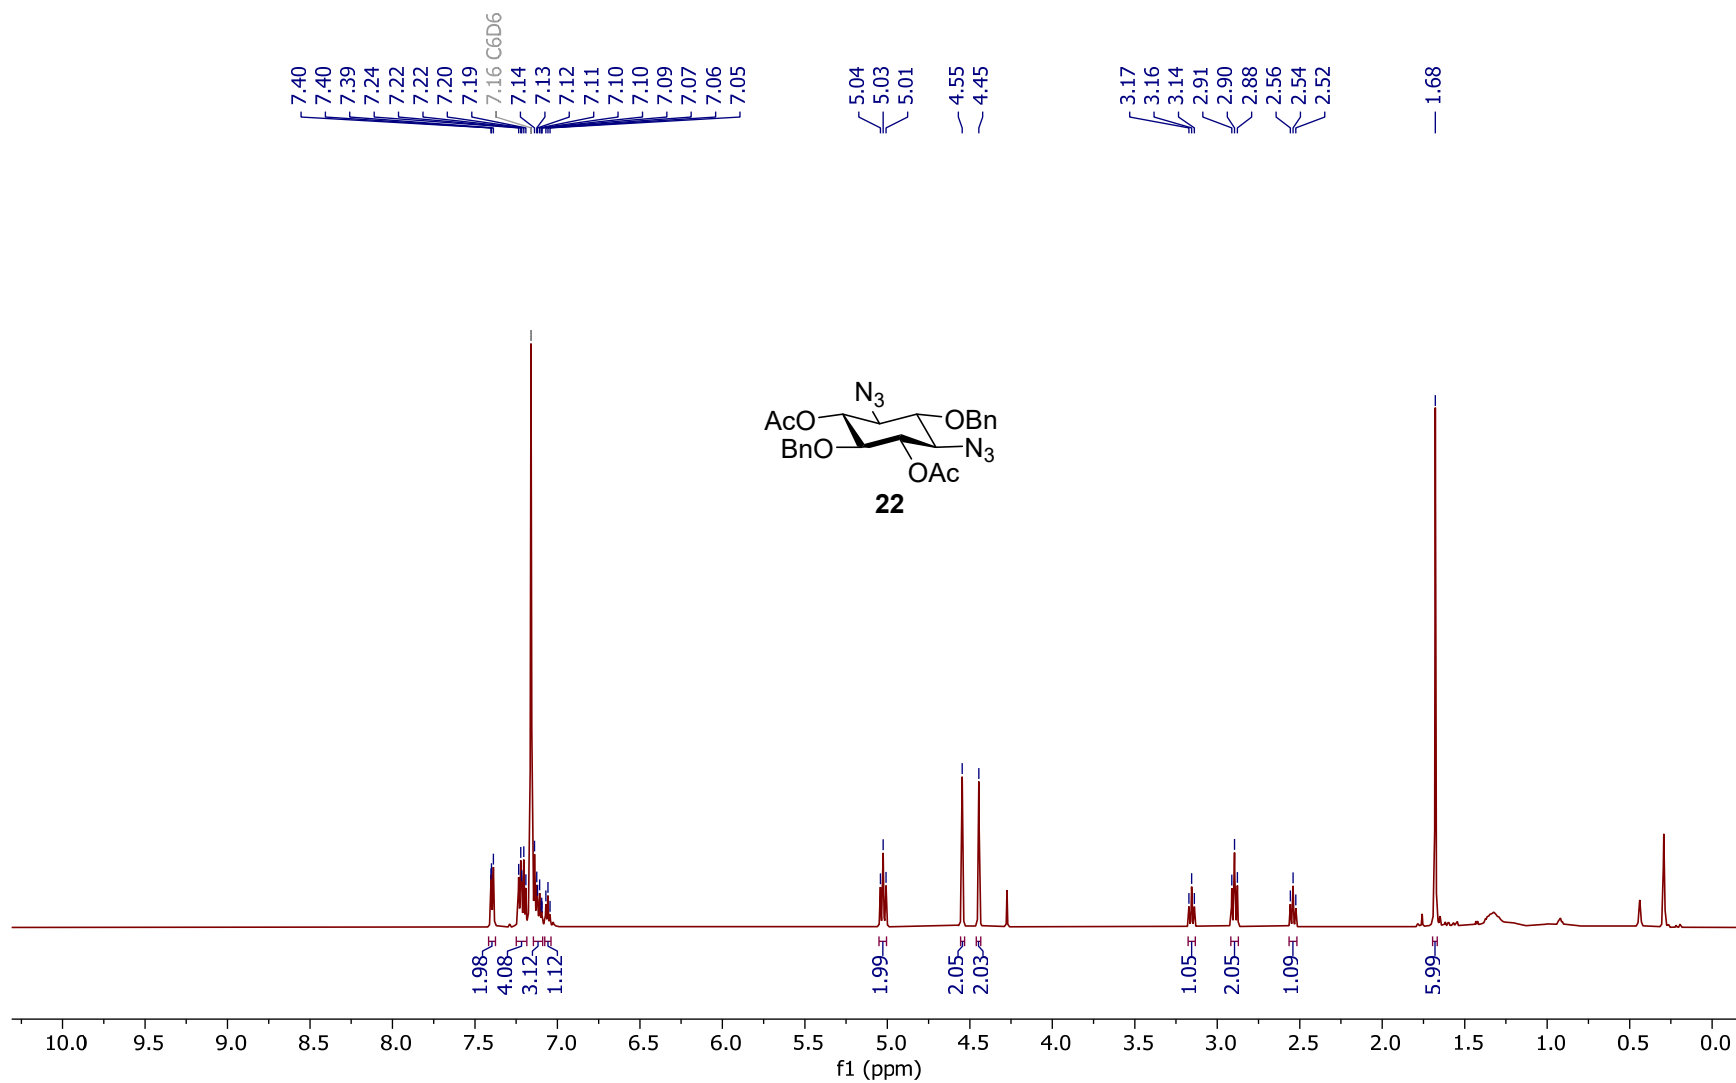



$^{13}\text{C}\{^1\text{H}\}$  NMR Spectra (500 MHz, Benzene- $d_6$ ) of 4,6-Di-O-acetyl-1,3-di(deamino)-1,3-diazido-2,5-di-O-benzylstreptamine (**22**)

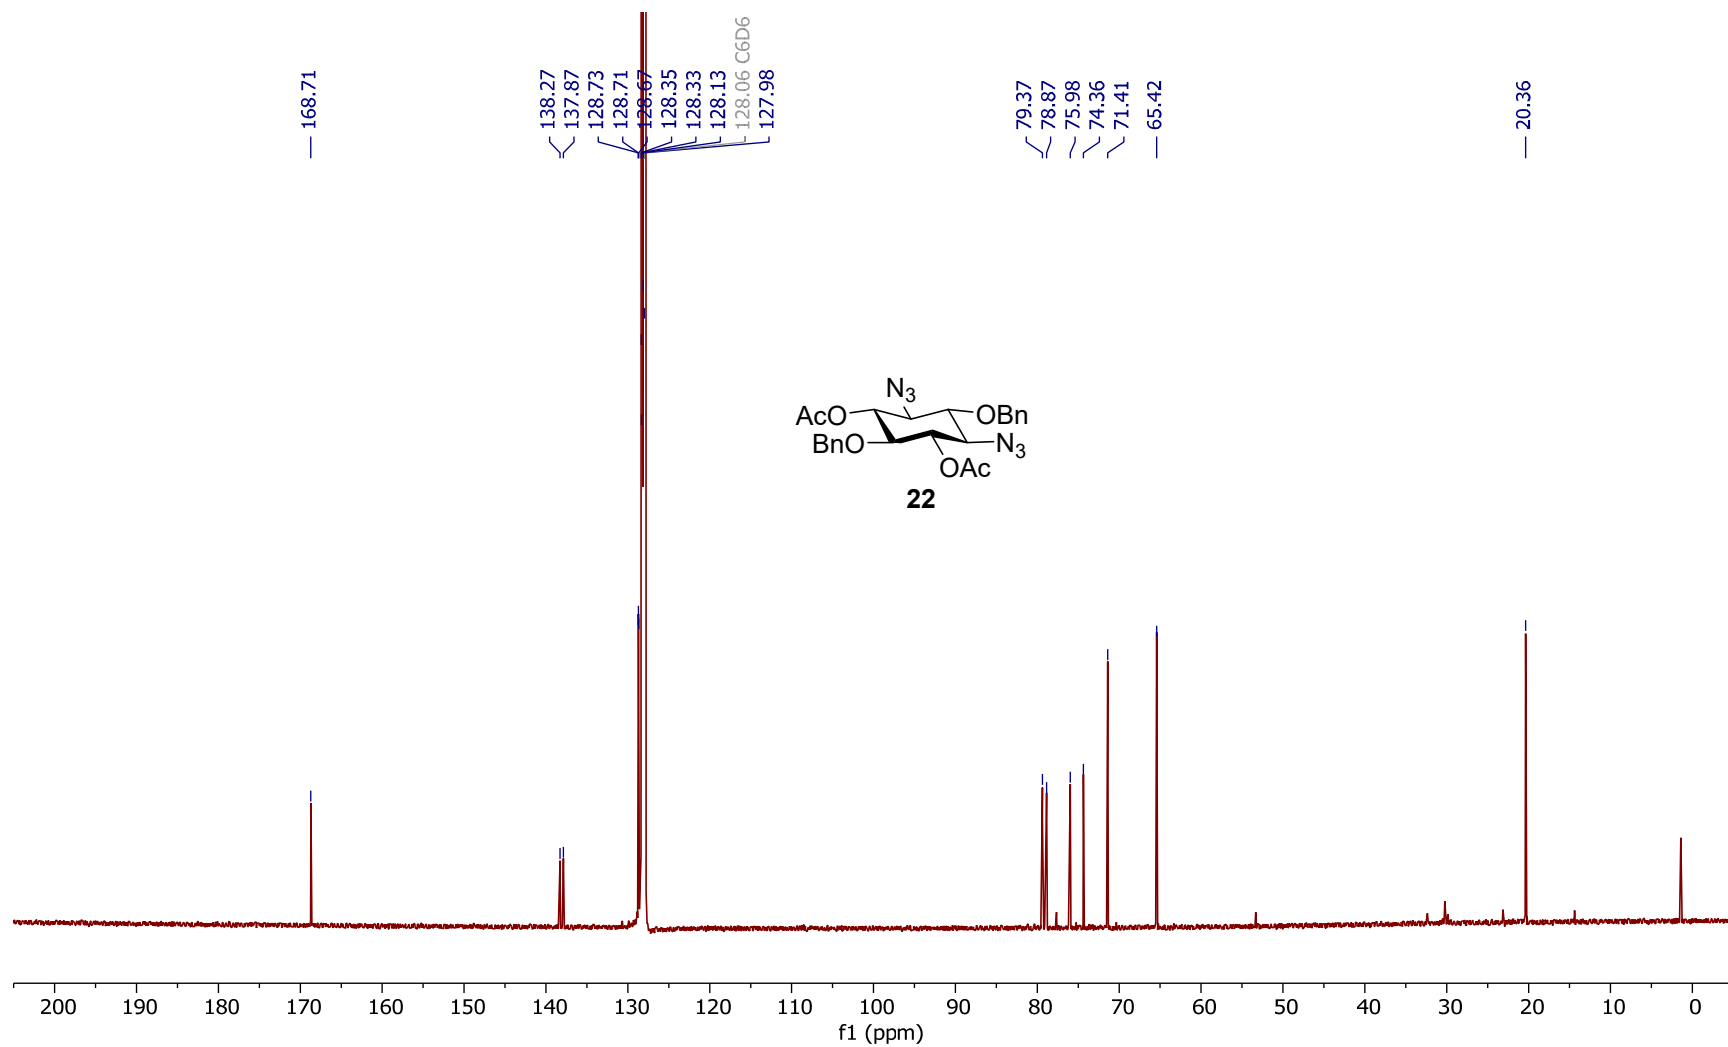

$^1\text{H}$ - $^1\text{H}$  COSY NMR Spectra (126 MHz, Benzene- $d_6$ ) of 4,6-Di-O-acetyl-1,3-di(deamino)-1,3-diazido-2,5-di-O-benzylstreptamine (**22**)

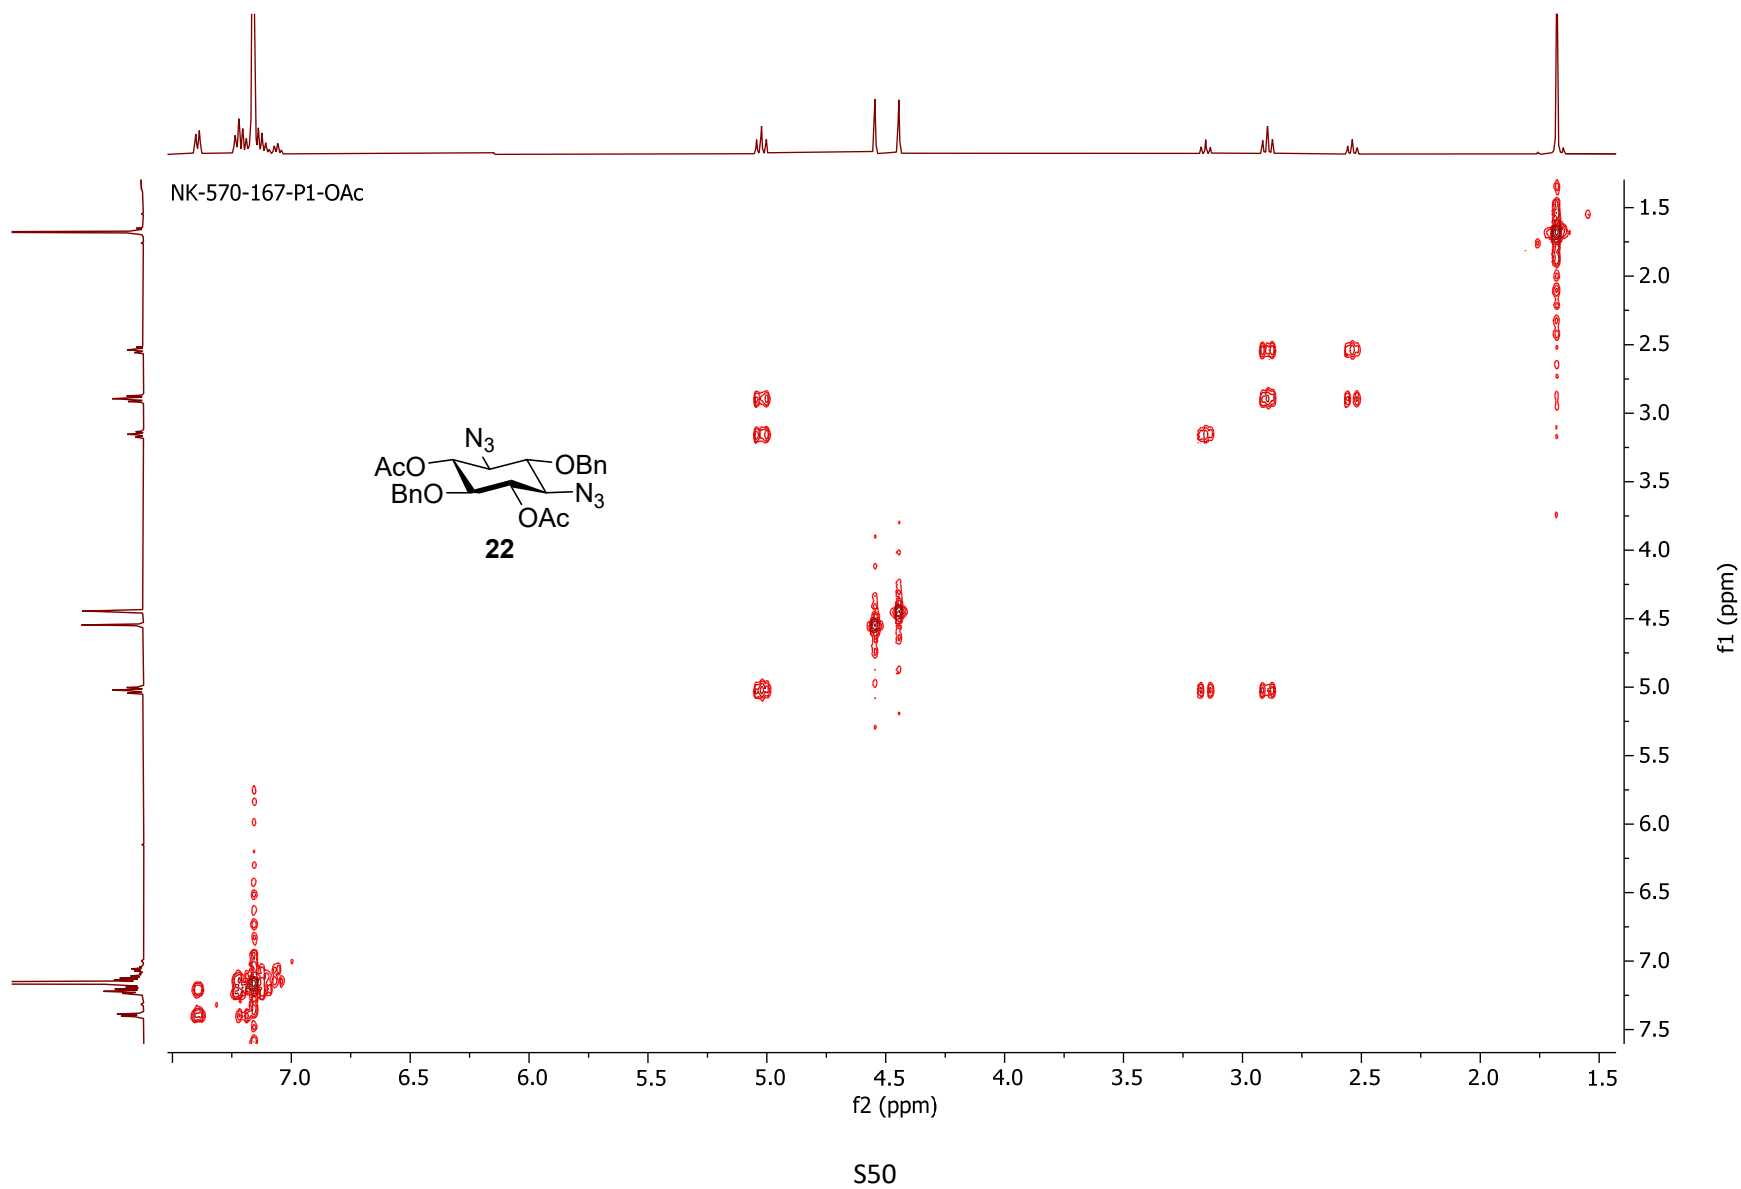

HSQC NMR Spectra (500 MHz, Benzene- $d_6$ ) of 4,6-Di-O-acetyl-1,3-di(deamino)-1,3-diazido-2,5-di-O-benzylstreptamine (**22**)

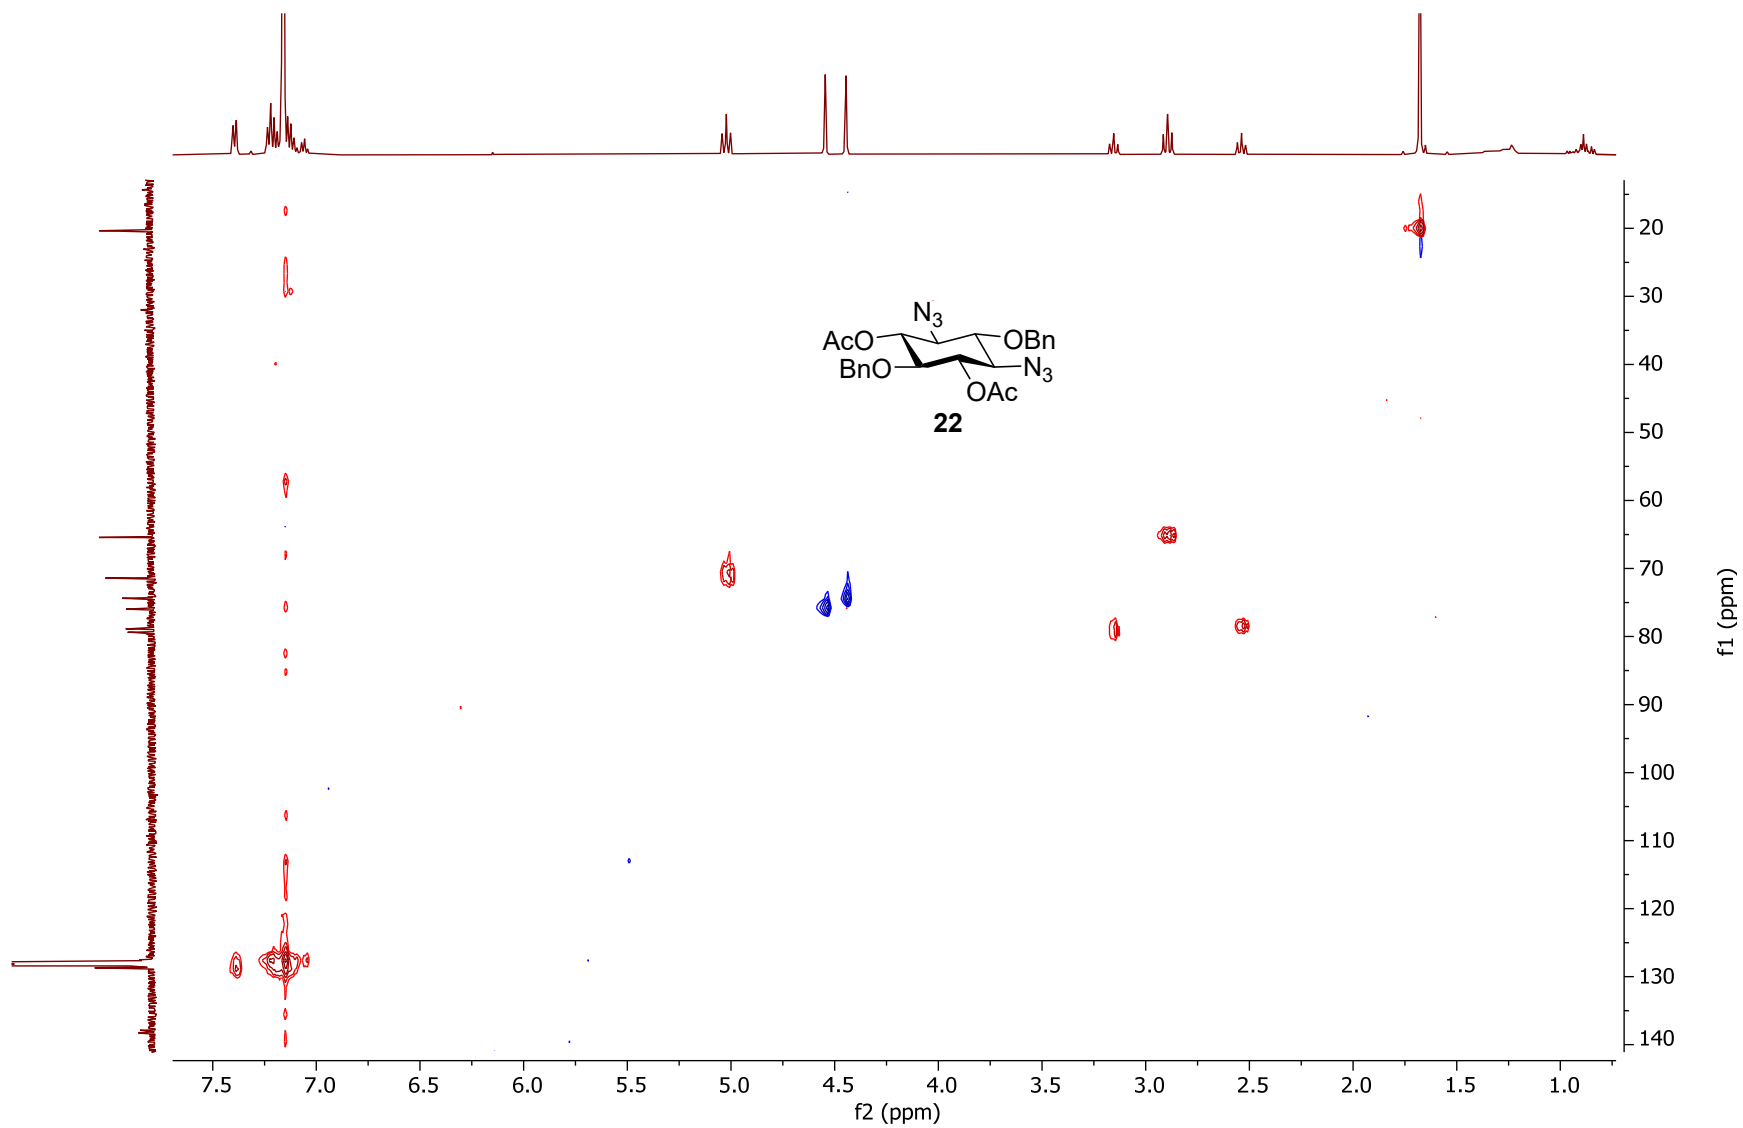



$^{13}\text{C}\{^1\text{H}\}$  NMR Spectra (126 MHz, Benzene- $d_6$ ) of 1,3-Di(deamino)-1-azido-3-*N*-tert-butylcarboxy-2,5,6-tri-*O*-benzyl-3,4-oxazolidino-streptamine (**23**)

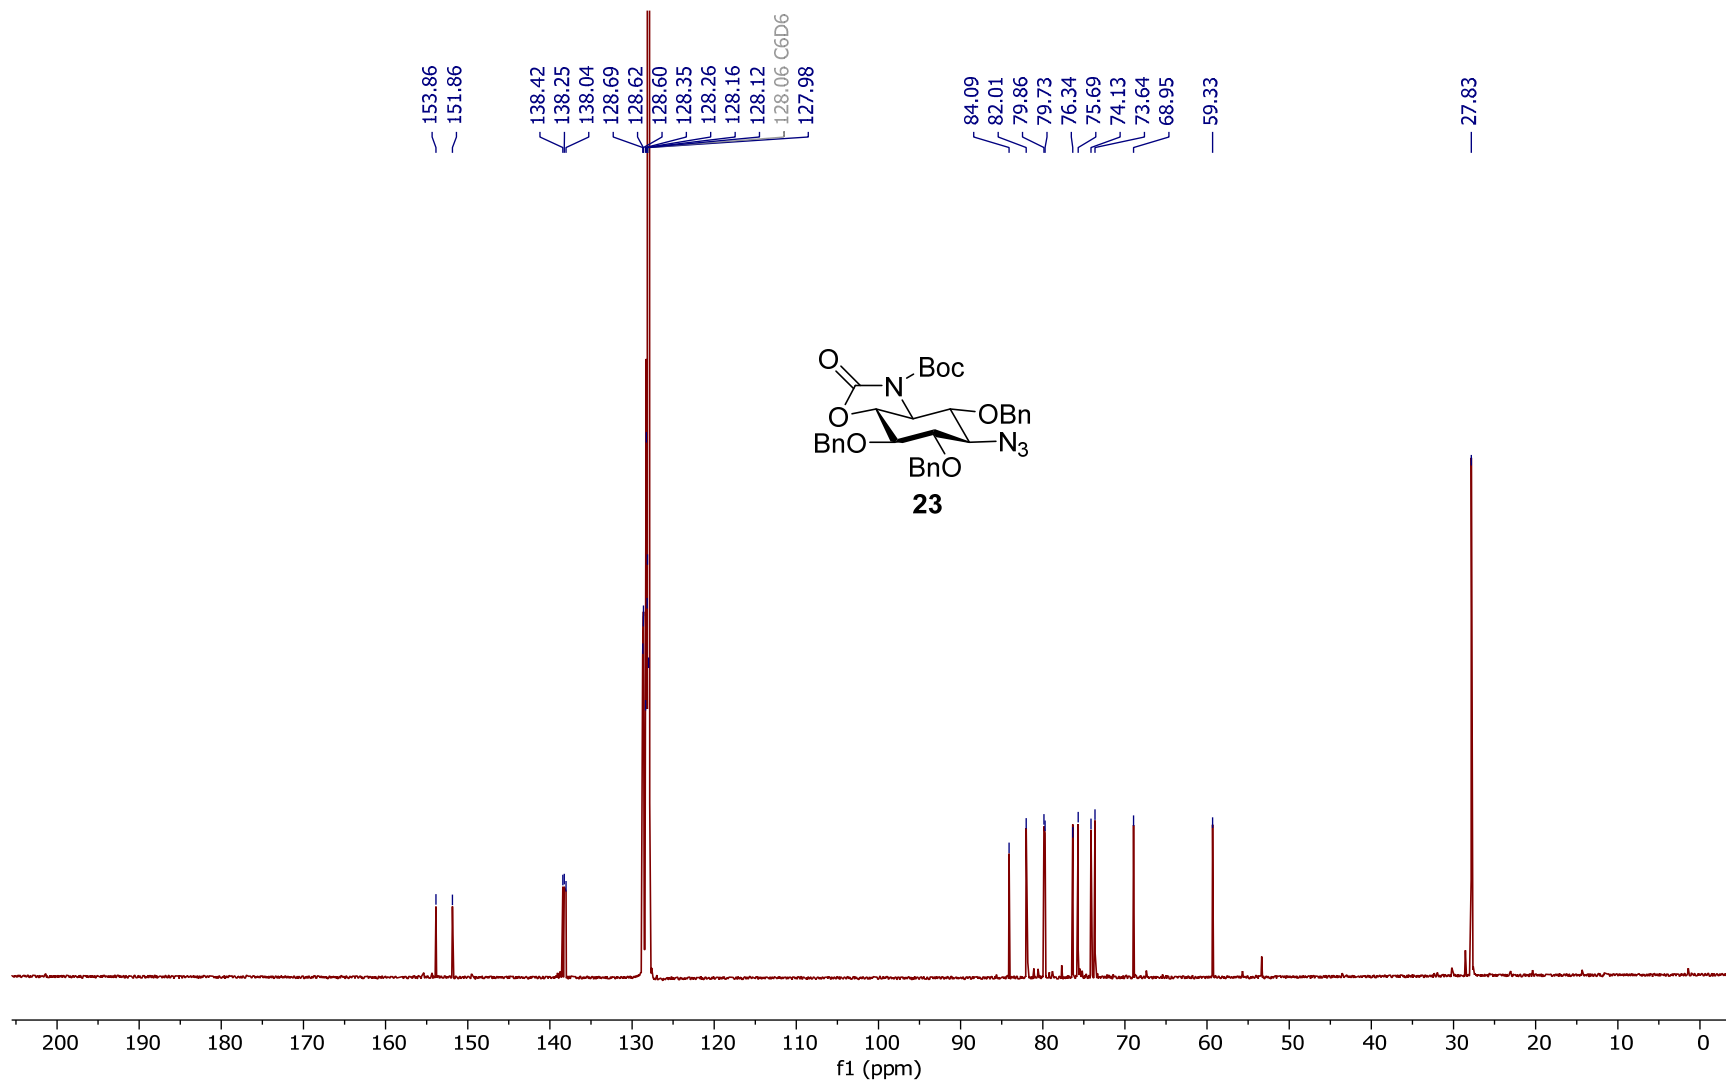

<sup>1</sup>H-<sup>1</sup>H COSY NMR Spectra (500 MHz, Benzene-d<sub>6</sub>) of 1,3-Di(deamino)-1-azido-3-*N*-tert-butylcarboxy-2,5,6-tri-*O*-benzyl-3,4-oxazolidino-streptamine (**23**)

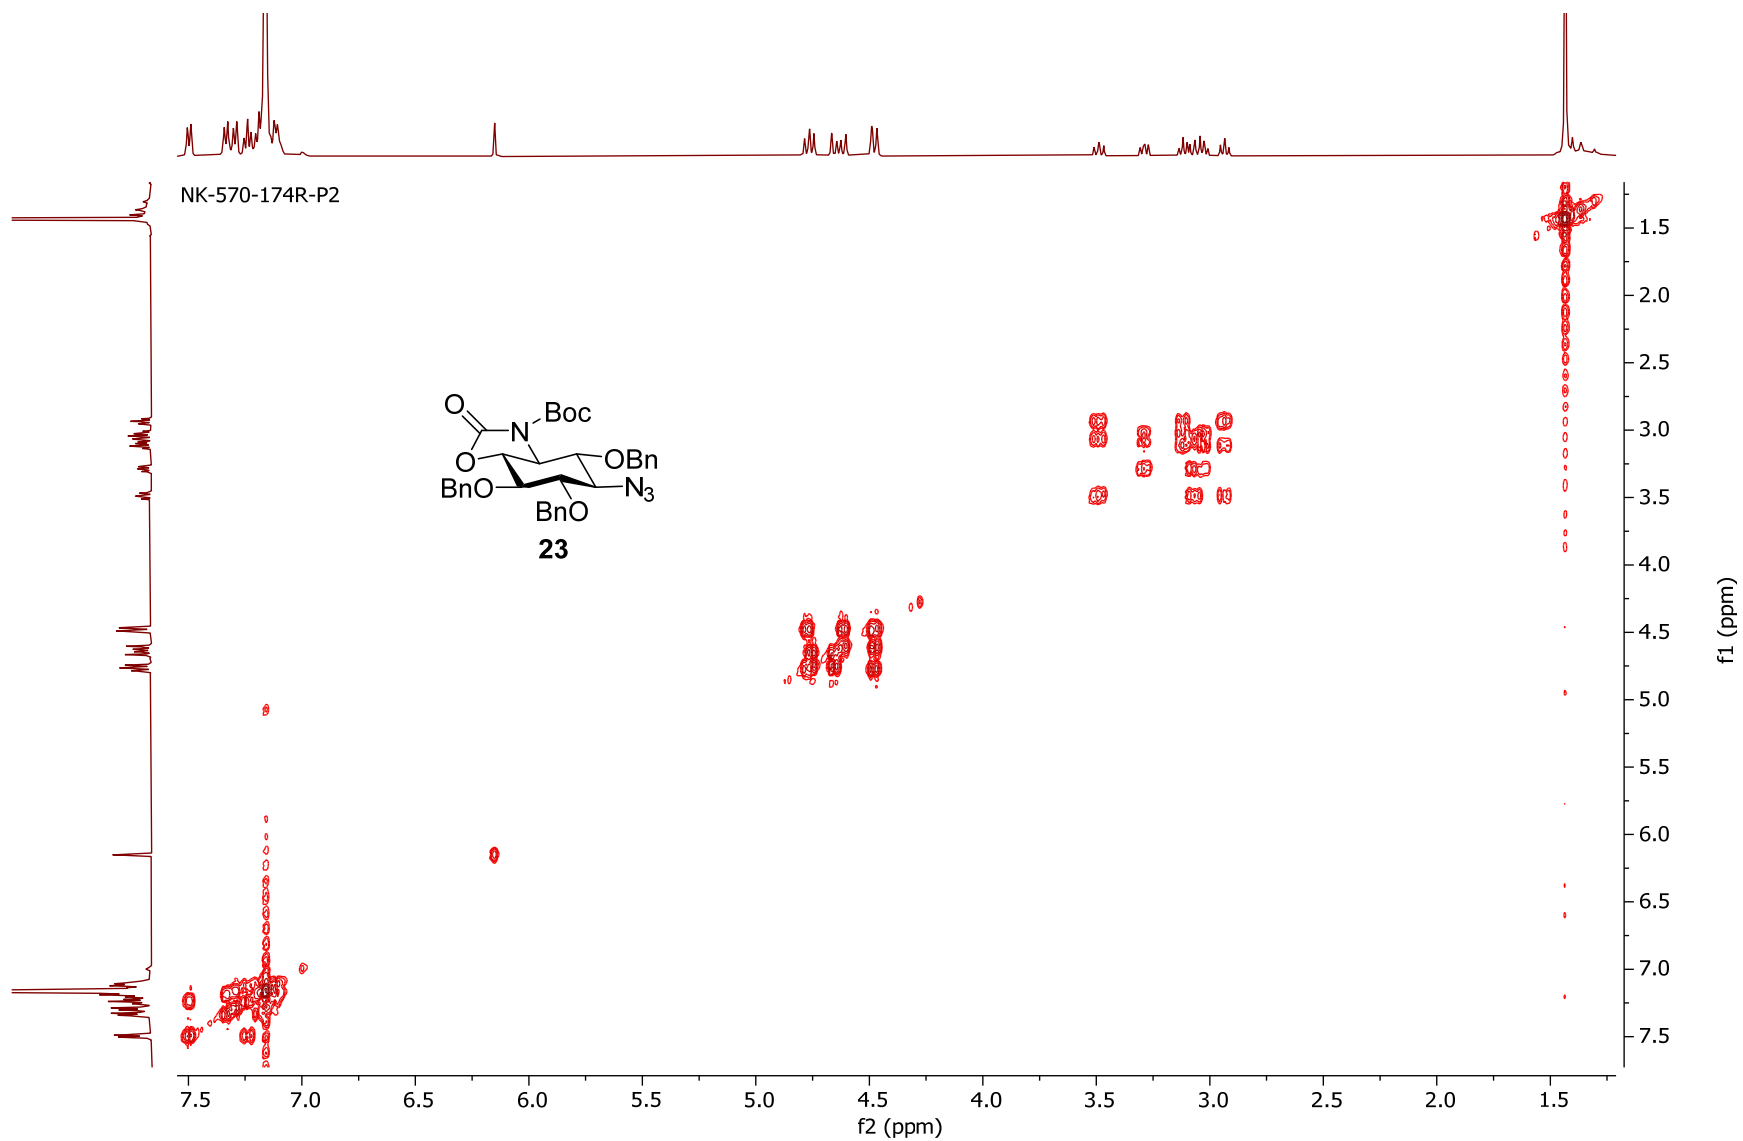

HSQC NMR Spectra (500 MHz, Benzene- $d_6$ ) of 1,3-Di(deamino)-1-azido-3-*N*-tert-butylcarboxy-2,5,6-tri-*O*-benzyl-3,4-oxazolidino-streptamine (**23**)

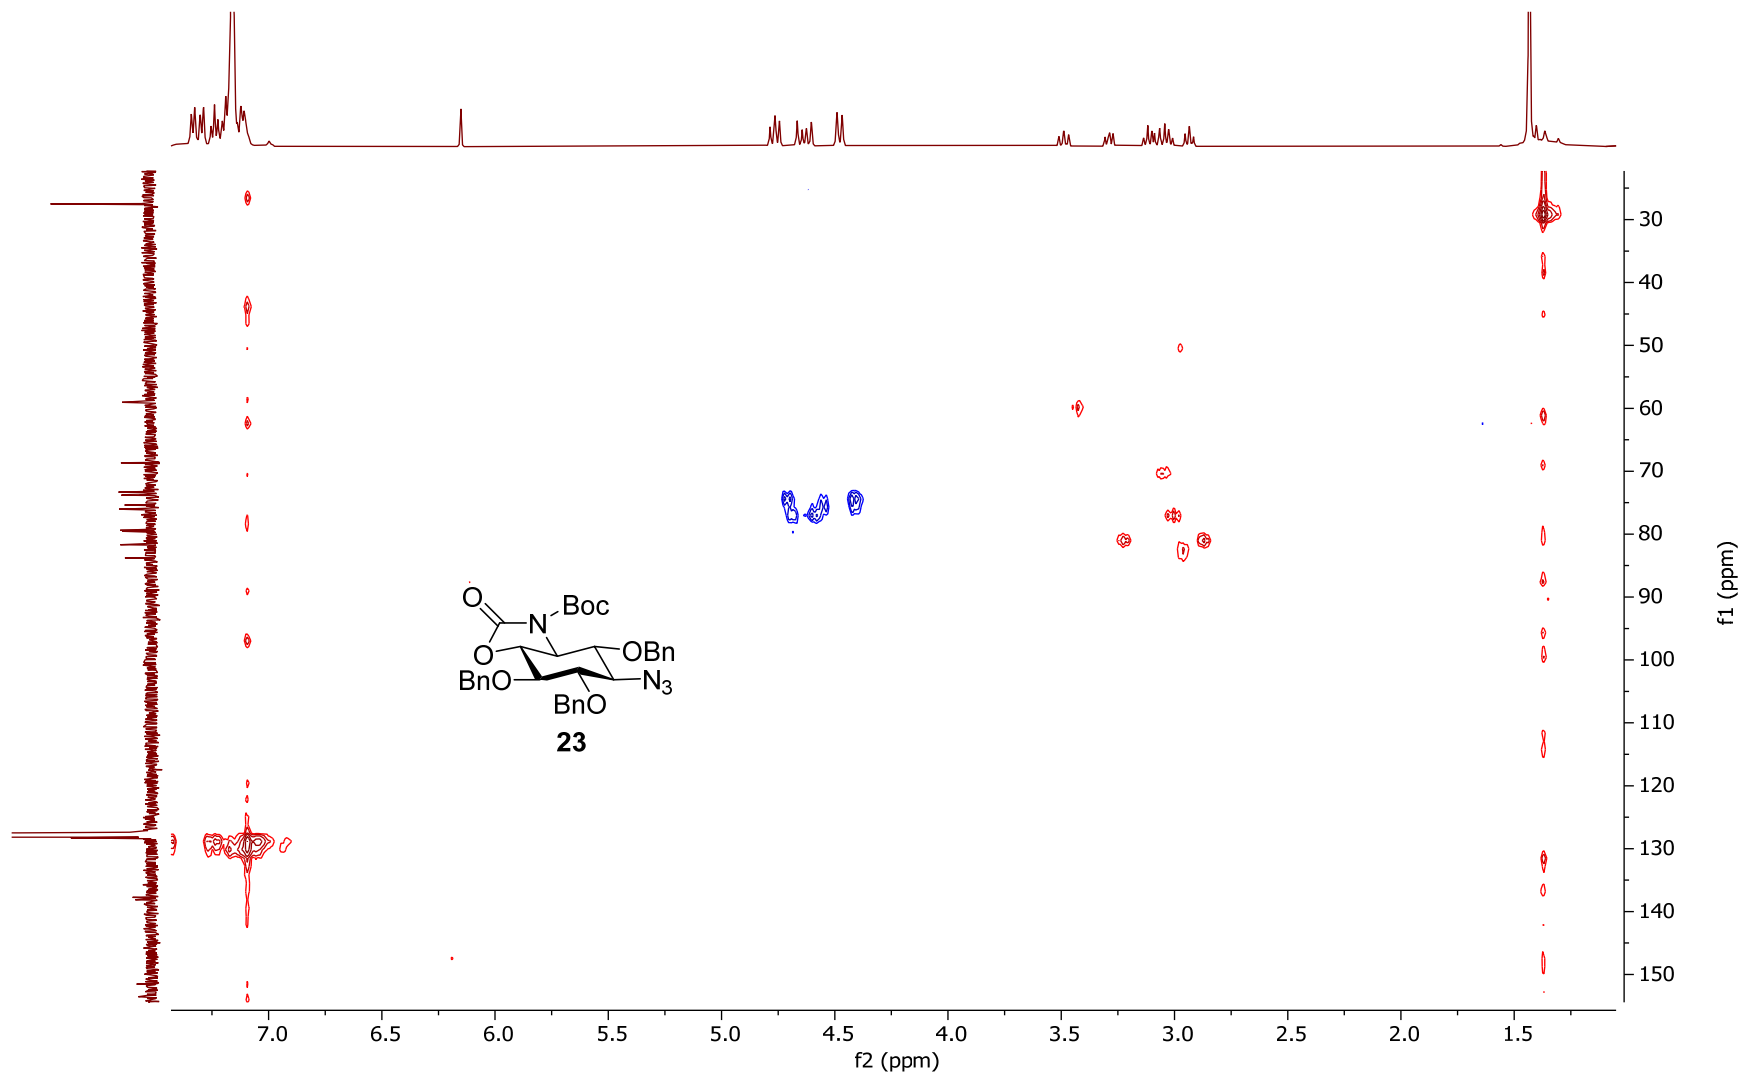

Supplement: jo3c02922_si_001.pdf [file jo3c02922_si_001.pdf]
